# Supplementary material for: Comparison between articular chondrocytes and mesenchymal stromal cells for the production of articular cartilage implants
Source: Front Bioeng Biotechnol. 2023 Feb 21;11:1116513. doi: 10.3389/fbioe.2023.1116513 (PMC9989206; doi:10.3389/fbioe.2023.1116513)
Supplement: Supplementary file 1 [file Table2.XLSX]

## Sheet: Content description
	sheet		description
	FDR ≤ 0.05		45 significantly differentially expressed proteins after applying Student's t-test with permutation-based FDR (FDR ≤ 0.05) and setting a fold change cut-off of "2".
	Targeted p ≤ 0.05		14 differentially expressed proteins were identified using targeted proteomics applying t-test with p ≤ 0.05
	On Off		111 proteins expressed in only one of the cell types were identified.
	Merged		Differentially expressed proteins merged from FDR, targeted, On/Off data and presented as "higher expressed" in the according disc type.
			13 proteins of the "on/off" list overlapped with the FDR list and another protein overlapped with those of the targeted list. For this reason, we identified in total 156 differentially expressed proteins.

## Sheet: FDR ≤ 0.05
Gene symbol	Protein name	FDR (q-value)	Fold Change
OGN	Mimecan	0.0512453	1205.18
CILP2	Cartilage intermediate layer protein 2;Cartilage intermediate layer protein 2 C1;Cartilage intermediate layer protein 2 C2	0.01925	332.523
FABP4	Fatty acid-binding protein, adipocyte	0.0306667	248.51
ABI3BP	Target of Nesh-SH3	0.0208	134.439
MXRA5	Matrix-remodeling-associated protein 5	0.018087	43.2267
DPT	Dermatopontin	0.0141538	41.9426
CD44	CD44 antigen	0.0171111	31.9251
PTN	Pleiotrophin	0.0443158	24.3483
SEPT4	Septin-4	0.0184	19.5777
COL7A1	Collagen alpha-1(VII) chain	0.0455135	15.2152
TM9SF4	Transmembrane 9 superfamily member 4	0.0218947	14.9273
RUNX1	Runt-related transcription factor 1	0.0421	13.587
TNC	Tenascin	0.02032	13.178
ENPP2	Ectonucleotide pyrophosphatase/phosphodiesterase family member 2	0.0403636	12.3303
PACSIN3	Protein kinase C and casein kinase substrate in neurons protein 3	0.022	11.583
SLC9A3R1	Na(+)/H(+) exchange regulatory cofactor NHE-RF1	0.0481143	7.78511
ANXA13	Annexin A13	0.041625	7.78423
COL16A1	Collagen alpha-1(XVI) chain	0.0410732	6.86188
TAGLN	Transgelin	0.0232308	4.41537
MGP	Matrix Gla protein	0.0377333	3.59342
RBPMS	RNA-binding protein with multiple splicing	0.046	3.49679
DDAH1	N(G),N(G)-dimethylarginine dimethylaminohydrolase 1	0.0487347	2.84387
NFIX;NFIA	Nuclear factor 1 X-type;Nuclear factor 1 A-type	0.0181176	2.69892
CALD1	Caldesmon	0.0470833	2.22796
SPTBN1	Spectrin beta chain, non-erythrocytic 1	0.0493818	2.19675
SPTAN1	Spectrin alpha chain, non-erythrocytic 1	0.0391628	1.99685
HSP90B1	Endoplasmin	0.0507451	1.95437
SLC30A7	Zinc transporter 7	0.023	-1.97735
ATP2B1	Plasma membrane calcium-transporting ATPase 1	0.044	-2.00673
QPRT	Nicotinate-nucleotide pyrophosphorylase [carboxylating]	0.0467778	-2.07042
MRPS22	28S ribosomal protein S22, mitochondrial	0.0457647	-2.10586
CNDP2	Cytosolic non-specific dipeptidase	0.0153333	-2.27843
MRPS27	28S ribosomal protein S27, mitochondrial	0.0262857	-2.54226
PRCP	Lysosomal Pro-X carboxypeptidase	0.0368	-2.73194
PLA2G4A	Cytosolic phospholipase A2;Phospholipase A2;Lysophospholipase	0.0400952	-2.95022
CYB5R1	NADH-cytochrome b5 reductase 1	0.04776	-2.98843
PDLIM1	PDZ and LIM domain protein 1	0.0394667	-3.23524
DCN	Decorin	0.0382727	-3.58579
CSK	Tyrosine-protein kinase CSK	0.0198095	-8.43595
MDN1	Midasin	0.0390345	-18.3025
SLC25A20	Mitochondrial carnitine/acylcarnitine carrier protein	0.023	-18.5852
CD97	CD97 antigen;CD97 antigen subunit alpha;CD97 antigen subunit beta	0.0189091	-21.5314
S100P	Protein S100-P	0.036	-21.8931
SDSL	Serine dehydratase-like	0.0205333	-23.2303
TMEM119	Transmembrane protein 119	0.0365161	-43.1438

## Sheet: Targeted p ≤ 0.05
Peptide	Protein	Gene symbol	AVG AC	AVG MSC	Fold Change	P-value
LGPQVSLDPMK	sp|Q9Y4K0|LOXL2_HUMAN	LOXL2	2.27667e+08	2.93333e+07	7.76136	0.00162847
VEVLVER	sp|Q9Y4K0|LOXL2_HUMAN	LOXL2	1.91667e+08	26600000	7.20551	0.00425872
VVCGMFGFPGER	sp|Q9Y4K0|LOXL2_HUMAN	LOXL2	211000000	34700000	6.08069	0.00499322
AVWSPEPCTTCLCSDGR	sp|O94769|ECM2_HUMAN	ECM2	7900000	1.38267e+06	5.7136	0.0167575
EIPSYTFSCIR	sp|O94769|ECM2_HUMAN	ECM2	2.10333e+07	4.23333e+06	4.9685	0.0207198
LQFSEVGTDWDAK	sp|Q86Y38|XYLT1_HUMAN	XYLT1	26700000	7.01333e+06	3.80703	0.000356836
ELEAFIADLDK	sp|Q9H4X1|RGCC_HUMAN	RGCC	18400000	5.79667e+06	3.17424	0.033104
AEDNADTLALVFEAPNQEK	sp|P12004|PCNA_HUMAN	PCNA	2.24667e+07	8930000	2.51586	0.0190567
LNSPTDSTPALLSATVTPQK	sp|Q9H4X1|RGCC_HUMAN	RGCC	24500000	10580000	2.31569	0.0132473
FDAGELITQR	sp|P35232|PHB_HUMAN	PHB	1.27667e+08	254000000	-1.98956	0.00579444
ALDTNYCFSSTEK	sp|P01137|TGFB1_HUMAN	TGFB1	2390000	5.00667e+06	-2.09484	0.00491144
VAGESAEPEPEPEADYYAK	sp|P01137|TGFB1_HUMAN	TGFB1	3720000	7.96667e+06	-2.14158	0.0181587
ISVTQPDSIVGIVAVDK	sp|Q6YHK3|CD109_HUMAN	CD109	138000000	3.84667e+08	-2.78744	0.0373973
IEFPILEDSSELQLK	sp|Q6YHK3|CD109_HUMAN	CD109	1.84333e+08	5.62333e+08	-3.05063	0.039008
EGLLAIFK	sp|P35222|CTNB1_HUMAN	CTNNB1	1.20067e+07	3.80667e+07	-3.17046	0.00456896
VAAGVLCELAQDK	sp|P35222|CTNB1_HUMAN	CTNNB1	1.25733e+07	45600000	-3.62672	0.000945522
ASVVPWETAADVR	sp|Q8TCT1|PHOP1_HUMAN	PHOSPHO1	1.17067e+08	469000000	-4.00626	0.015157
VGLGLPLSPR	sp|Q03431|PTH1R_HUMAN	PTH1R	2.10033e+07	96700000	-4.60403	0.00473838
VLSDYLR	sp|Q8TCT1|PHOP1_HUMAN	PHOSPHO1	25390000	1.68667e+08	-6.64304	0.00646076
ILSNPSGPDAR	sp|Q8TCT1|PHOP1_HUMAN	PHOSPHO1	2.08333e+07	1.69333e+08	-8.128	0.00793399
AYEDEYSYFK	sp|P21815|SIAL_HUMAN	IBSP	2.40847e+06	2.15667e+07	-8.95452	0.0110525
LELPLDR	sp|Q96QZ0|PANX3_HUMAN	PANX3	5880000	9.09333e+07	-15.4649	0.0373969
SSDPYVFWNELEK	sp|Q96QZ0|PANX3_HUMAN	PANX3	2.90933e+06	4.61667e+07	-15.8685	0.00105327
AYPAIGTPIPFDK	sp|Q03692|COAA1_HUMAN	COL10A1	9.17967e+07	1.90667e+09	-20.7705	0.0387828
TTTSPNGGFEPTTPPQVYR	sp|P21815|SIAL_HUMAN	IBSP	4460000	144700000	-32.4439	0.00544499

## Sheet: On Off
Gene symbol	AVG AC	AVG MSC
FABP4	8.36936	n.d.
LTBP2	7.83616	n.d.
MXRA5	7.82945	n.d.
GLUL	7.5221	n.d.
SERPINA5	7.50966	n.d.
PTN	7.33032	n.d.
DNM1	7.30239	n.d.
TM9SF4	7.30019	n.d.
SEPT4	7.23846	n.d.
MFAP2	7.17791	n.d.
RAB6C	7.13447	n.d.
PACSIN3	7.02008	n.d.
FIBIN	7.01261	n.d.
METTL7A	6.99961	n.d.
AOX1	6.97117	n.d.
MFAP4	6.91775	n.d.
FRZB	6.89223	n.d.
ANXA13	6.87343	n.d.
GREM1	6.85673	n.d.
CDKN2C	6.85613	n.d.
SORBS1	6.82314	n.d.
GDF10	6.80685	n.d.
MCM6	6.74564	n.d.
RBPMS	6.73018	n.d.
TBC1D1	6.70681	n.d.
HAAO	6.69762	n.d.
UBXN7	6.54582	n.d.
HS1BP3	6.54561	n.d.
GATSL3	6.54413	n.d.
PLXDC2	6.5376	n.d.
SARM1	6.4299	n.d.
GGT5	6.40924	n.d.
SUGP2	6.23346	n.d.
LOXL1	6.22822	n.d.
TEKT1	6.22264	n.d.
PCBP3	6.05153	n.d.
PPP1R14C	5.97658	n.d.
EIF4E2	5.95245	n.d.
ATP6V1D	5.92254	n.d.
MCM3	5.86727	n.d.
RSF1	5.85824	n.d.
LPL	5.84176	n.d.
EXOSC9	5.81972	n.d.
MCM2	5.68494	n.d.
FCGRT	5.67881	n.d.
C2orf40	5.5904	n.d.
ITIH5	5.51842	n.d.
CCDC50	5.4032	n.d.
PPP2R5E	n.d.	4.9585
PGPEP1	n.d.	5.32206
MRPS9	n.d.	5.51357
IFIT5	n.d.	5.51844
NPR3	n.d.	5.53398
GNAI1	n.d.	5.54435
GPR107	n.d.	5.54572
SLC38A5	n.d.	5.55248
DHRS11	n.d.	5.56887
DIP2B	n.d.	5.58981
FADS2	n.d.	5.68356
SUMF1	n.d.	5.73098
SDHAF2	n.d.	5.75469
SESN2	n.d.	5.75841
SH3BGR	n.d.	5.76027
ICAM2	n.d.	5.77011
NDUFAF2	n.d.	5.77671
NOC2L	n.d.	5.78277
LPCAT3	n.d.	5.7902
MPZL1	n.d.	5.8266
UQCRQ	n.d.	5.83372
TFCP2	n.d.	5.84078
YIPF4	n.d.	5.84338
GPSM2	n.d.	5.93505
PNPT1	n.d.	5.9416
GCDH	n.d.	6.00257
TBC1D15	n.d.	6.02359
SPRYD4	n.d.	6.02801
RSPRY1	n.d.	6.07147
SH3BP4	n.d.	6.13302
CA12	n.d.	6.1381
OSBPL2	n.d.	6.15596
PPM1L	n.d.	6.22348
MED4	n.d.	6.26795
GRSF1	n.d.	6.26916
C2orf43	n.d.	6.2944
MICU1	n.d.	6.29674
LARP7	n.d.	6.39578
PLCB3	n.d.	6.48808
MRPL20	n.d.	6.49241
FYTTD1	n.d.	6.50391
PAWR	n.d.	6.54142
BCS1L	n.d.	6.54548
AOC3	n.d.	6.5832
MRAS	n.d.	6.63305
EEF1A2	n.d.	6.65617
TEX10	n.d.	6.70309
FBN2	n.d.	6.71086
MRPL28	n.d.	6.78697
CSK	n.d.	6.85382
FAM45A;FAM45B	n.d.	6.8944
APBB2	n.d.	6.94758
MAP2	n.d.	6.98793
TSPAN13	n.d.	7.05492
CD97	n.d.	7.15051
SLC25A20	n.d.	7.25277
CXCL14	n.d.	7.29135
MDN1	n.d.	7.34195
GALNT3	n.d.	7.34468
SPP1	n.d.	7.41371
SDSL	n.d.	7.4747
SERPINF1	n.d.	7.50037
IBSP	n.d.	7.77203

## Sheet: Merged
Up in AC	Up in MSC
ABI3BP	AOC3
ANXA13	APBB2
AOX1	ATP2B1
ATP6V1D	BCS1L
C2orf40	C2orf43
CALD1	CA12
CCDC50	CD109
CD44	CD97
CDKN2C	CNDP2
CILP2	COL10A1
COL16A1	CSK
COL7A1	CTNNB1
DDAH1	CXCL14
DNM1	CYB5R1
DPT	DCN
ECM2	DHRS11
EIF4E2	DIP2B
ENPP2	EEF1A2
EXOSC9	FADS2
FABP4	FAM45A;FAM45B
FCGRT	FBN2
FIBIN	FYTTD1
FRZB	GALNT3
GATSL3	GCDH
GDF10	GNAI1
GGT5	GPR107
GLUL	GPSM2
GREM1	GRSF1
HAAO	IBSP
HS1BP3	ICAM2
HSP90B1	IFIT5
ITIH5	LARP7
LOXL1	LPCAT3
LOXL2	MAP2
LPL	MDN1
LTBP2	MED4
MCM2	MICU1
MCM3	MPZL1
MCM6	MRAS
METTL7A	MRPL20
MFAP2	MRPL28
MFAP4	MRPS22
MGP	MRPS27
MXRA5	MRPS9
NFIX;NFIA	NDUFAF2
OGN	NOC2L
PACSIN3	NPR3
PCBP3	OSBPL2
PCNA	PANX3
PLXDC2	PAWR
PPP1R14C	PDLIM1
PTN	PGPEP1
RAB6C	PHB
RBPMS	PHOSPHO1
RGCC	PLA2G4A
RSF1	PLCB3
RUNX1	PNPT1
SARM1	PPM1L
SEPT4	PPP2R5E
SERPINA5	PRCP
SLC9A3R1	PTH1R
SORBS1	QPRT
SPTAN1	RSPRY1
SPTBN1	S100P
SUGP2	SDHAF2
TAGLN	SDSL
TBC1D1	SERPINF1
TEKT1	SESN2
TM9SF4	SH3BGR
TNC	SH3BP4
UBXN7	SLC25A20
XYLT1	SLC30A7
	SLC38A5
	SPP1
	SPRYD4
	SUMF1
	TBC1D15
	TEX10
	TFCP2
	TGFB1
	TMEM119
	TSPAN13
	UQCRQ
	YIPF4
