# Supplementary material for: Comparison between articular chondrocytes and mesenchymal stromal cells for the production of articular cartilage implants
Source: Front Bioeng Biotechnol. 2023 Feb 21;11:1116513. doi: 10.3389/fbioe.2023.1116513 (PMC9989206; doi:10.3389/fbioe.2023.1116513)
Supplement: Supplementary file 2 [file Table3.XLSX]

## Sheet: Content description
	Content description
	156 differentially expressed proteins were uploaded into the analysis program Enrichr.The following analyses are presented (categories were sorted by significance for each cell type):
	BioPlanet	Analysis of pathways where proteins are involved
	GO Biological Process	Gene ontology analysis of biological processes where proteins are involved
	GO Cellular Component	Gene ontology analysis of cellular components where proteins are involved
	GO Molecular Function	Gene ontology analysis of molecular functions of the proteins

## Sheet: BioPlanet
Upregulated in articular chondrocytes
Term	P-value	Adjusted P-value	Proteins
G1 to S cell cycle control	4.26332e-06	0.000532491	PCNA;CDKN2C;MCM3;MCM6;MCM2
DNA strand elongation	4.51263e-06	0.000532491	PCNA;MCM3;MCM6;MCM2
Unwinding of DNA	7.2297e-06	0.000568736	MCM3;MCM6;MCM2
CDK regulation of DNA replication	3.5113e-05	0.00207166	MCM3;MCM6;MCM2
Mitotic G1-G1/S phases	0.000126644	0.00597757	PCNA;CDKN2C;MCM3;MCM6;MCM2
Activation of the pre-replicative complex	0.000169372	0.00633136	MCM3;MCM6;MCM2
TGF-beta regulation of extracellular matrix	0.000187795	0.00633136	ECM2;NFIA;COL7A1;OGN;TNC;AOX1;LPL;LTBP2;PTN
G2/M checkpoints	0.000497858	0.0146868	MCM3;MCM6;MCM2
S phase	0.000715191	0.0187539	PCNA;MCM3;MCM6;MCM2
Interleukin-1 regulation of extracellular matrix	0.00092571	0.0218468	GREM1;GDF10;PLXDC2;RUNX1
Upregulated in mesenchymal stromal cells
Term	P-value	Adjusted P-value	Proteins
Endochondral ossification	0.000171138	0.0633211	TGFB1;SPP1;COL10A1;PTH1R
Integrin cell surface interactions	0.000452575	0.0637789	IBSP;ICAM2;SPP1;CSK
G-protein-mediated events	0.000835906	0.0637789	PLCB3;PLA2G4A;GNAI1
Bone mineralization regulation	0.000935374	0.0637789	IBSP;SPP1
Metabolism	0.00100367	0.0637789	AOC3;CA12;GCDH;GALNT3;QPRT;PLA2G4A;MED4;DCN;GNAI1;CNDP2;FADS2;PHOSPHO1;PLCB3;UQCRQ;LPCAT3;CTNNB1
Lipid and lipoprotein metabolism	0.00103425	0.0637789	FADS2;PHOSPHO1;PPM1L;LPCAT3;PLA2G4A;SLC25A20;MED4;SUMF1
Osteoblast signaling	0.001535	0.0701579	IBSP;PTH1R
Phospholipid metabolism	0.00172673	0.0701579	PHOSPHO1;PPM1L;LPCAT3;PLA2G4A;SUMF1
Platelet sensitization by LDL	0.00227539	0.0701579	PPP2R5E;PLA2G4A
Acyl chain remodelling of phosphatidylserine	0.00227539	0.0701579	LPCAT3;PLA2G4A

## Sheet: GO Biological Process
Upregulated in articular chondrocytes
Term	P-value	Adjusted P-value	Proteins
extracellular matrix organization (GO:0030198)	1.17118e-07	0.00010283	GREM1;COL16A1;ECM2;COL7A1;MFAP2;TNC;DPT;LOXL1;CD44;LOXL2
collagen fibril organization (GO:0030199)	8.08008e-07	0.000354716	GREM1;COL16A1;COL7A1;DPT;LOXL1;LOXL2
pre-replicative complex assembly involved in nuclear cell cycle DNA replication (GO:0006267)	2.47282e-06	0.000723711	MCM3;MCM6;MCM2
mitotic DNA replication (GO:1902969)	5.27157e-06	0.00115711	MCM3;MCM6;MCM2
nuclear DNA replication (GO:0033260)	7.2297e-06	0.00126953	MCM3;MCM6;MCM2
double-strand break repair via break-induced replication (GO:0000727)	9.61471e-06	0.00140695	MCM3;MCM6;MCM2
extracellular structure organization (GO:0043062)	1.26321e-05	0.00142852	COL16A1;ECM2;COL7A1;MFAP2;TNC;LOXL1;CD44
external encapsulating structure organization (GO:0045229)	1.30161e-05	0.00142852	COL16A1;ECM2;COL7A1;MFAP2;TNC;LOXL1;CD44
supramolecular fiber organization (GO:0097435)	3.74095e-05	0.0036495	GREM1;MFAP4;COL16A1;COL7A1;DPT;LTBP2;LOXL1;LOXL2
pyridine-containing compound metabolic process (GO:0072524)	0.000126909	0.0101297	HAAO;AOX1
Upregulated in mesenchymal stromal cells
Term	P-value	Adjusted P-value	Proteins
negative regulation of cell growth (GO:0030308)	1.00886e-06	0.000955394	TGFB1;MAP2;SESN2;SH3BP4;APBB2;DIP2B;PHB
translational elongation (GO:0006414)	5.00287e-06	0.00236886	MRPL20;MRPS9;MRPS27;MRPS22;EEF1A2;MRPL28
negative regulation of growth (GO:0045926)	1.50886e-05	0.00364414	TGFB1;PNPT1;SESN2;SH3BP4;APBB2;PHB
positive regulation of bone mineralization (GO:0030501)	1.53924e-05	0.00364414	FBN2;TGFB1;TMEM119;ATP2B1
positive regulation of ossification (GO:0045778)	2.35777e-05	0.00411051	FBN2;TGFB1;TMEM119;ATP2B1
positive regulation of biomineral tissue development (GO:0070169)	2.60434e-05	0.00411051	FBN2;TGFB1;TMEM119;ATP2B1
mitochondrial translational elongation (GO:0070125)	3.64651e-05	0.00431655	MRPL20;MRPS9;MRPS27;MRPS22;MRPL28
mitochondrial translational termination (GO:0070126)	3.64651e-05	0.00431655	MRPL20;MRPS9;MRPS27;MRPS22;MRPL28
translational termination (GO:0006415)	5.24789e-05	0.00552195	MRPL20;MRPS9;MRPS27;MRPS22;MRPL28
mitochondrial translation (GO:0032543)	8.04919e-05	0.00762258	MRPL20;MRPS9;MRPS27;MRPS22;MRPL28

## Sheet: GO Cellular Component
Upregulated in articular chondrocytes
Term	P-value	Adjusted P-value	Proteins
collagen-containing extracellular matrix (GO:0062023)	1.13345e-15	9.06757e-14	ITIH5;GDF10;COL16A1;TNC;DPT;LTBP2;LOXL1;LOXL2;SERPINA5;HSP90B1;GREM1;MFAP4;ABI3BP;COL7A1;OGN;MGP;MFAP2;MXRA5
CMG complex (GO:0071162)	5.27157e-06	0.000210863	MCM3;MCM6;MCM2
nuclear chromosome (GO:0000228)	0.000228872	0.00610325	EXOSC9;MCM3;MCM6;MCM2
microfibril (GO:0001527)	0.000688306	0.0137661	MFAP4;MFAP2
supramolecular fiber (GO:0099512)	0.00210052	0.0336083	MFAP4;MFAP2
tertiary granule lumen (GO:1904724)	0.0167826	0.122337	METTL7A;SPTAN1
extracellular membrane-bounded organelle (GO:0065010)	0.0173642	0.122337	OGN;SPTAN1
alpha DNA polymerase:primase complex (GO:0005658)	0.0178725	0.122337	MCM3
elastic fiber (GO:0071953)	0.0178725	0.122337	MFAP4
microvillus (GO:0005902)	0.0179542	0.122337	SLC9A3R1;CD44
Upregulated in mesenchymal stromal cells
Term	P-value	Adjusted P-value	Proteins
mitochondrial inner membrane (GO:0005743)	1.2167e-08	9.89082e-07	MRPL20;MRPS9;MRPS27;UQCRQ;MRPS22;NDUFAF2;PLA2G4A;MRPL28;PHB;SLC25A20;BCS1L;MICU1
organelle inner membrane (GO:0019866)	2.19796e-08	9.89082e-07	MRPL20;MRPS9;MRPS27;UQCRQ;MRPS22;NDUFAF2;PLA2G4A;MRPL28;PHB;SLC25A20;BCS1L;MICU1
mitochondrial membrane (GO:0031966)	5.88453e-07	1.76536e-05	MRPL20;MRPS9;MRPS27;UQCRQ;MRPS22;NDUFAF2;PLA2G4A;MRPL28;PHB;SLC25A20;BCS1L;MICU1
mitochondrial ribosome (GO:0005761)	0.000119114	0.00268006	MRPL20;MRPS22;MRPL28
mitochondrial respiratory chain complex III (GO:0005750)	0.000615596	0.0110807	UQCRQ;BCS1L
cell cortex region (GO:0099738)	0.000935374	0.0140306	GPSM2;GNAI1
microvillus (GO:0005902)	0.00177571	0.0228306	AOC3;TGFB1;ICAM2
platelet alpha granule membrane (GO:0031092)	0.00227539	0.0255982	CYB5R1;CD109
preribosome, large subunit precursor (GO:0030687)	0.00416432	0.0416432	NOC2L;MDN1
actin-based cell projection (GO:0098858)	0.00515652	0.0464087	AOC3;TGFB1;ICAM2

## Sheet: GO Molecular Function
Upregulated in articular chondrocytes
Term	P-value	Adjusted P-value	Proteins
DNA replication origin binding (GO:0003688)	7.52289e-05	0.0106825	MCM3;MCM6;MCM2
3'-5' DNA helicase activity (GO:0043138)	0.00148437	0.0994246	MCM6;MCM2
single-stranded DNA helicase activity (GO:0017116)	0.00210052	0.0994246	MCM6;MCM2
protein phosphatase inhibitor activity (GO:0004864)	0.00487269	0.147056	PPP1R14C;PTN
single-stranded DNA binding (GO:0003697)	0.00517802	0.147056	MCM3;MCM6;MCM2
calcium ion binding (GO:0005509)	0.0083735	0.160931	ANXA13;ENPP2;LPL;LOXL2;HSP90B1
exonuclease activity (GO:0004527)	0.0134757	0.160931	EXOSC9;ENPP2
iron ion binding (GO:0005506)	0.0162097	0.160931	HAAO;AOX1
IgG binding (GO:0019864)	0.0178725	0.160931	FCGRT
acrosin binding (GO:0032190)	0.0178725	0.160931	SERPINA5
Upregulated in mesenchymal stromal cells
Term	P-value	Adjusted P-value	Proteins
GDP-dissociation inhibitor activity (GO:0005092)	0.00131931	0.152905	GPSM2;SH3BP4
poly(U) RNA binding (GO:0008266)	0.00381257	0.152905	PNPT1;IFIT5
poly-pyrimidine tract binding (GO:0008187)	0.00491116	0.152905	PNPT1;IFIT5
O-acyltransferase activity (GO:0008374)	0.00702513	0.152905	LPCAT3;PLA2G4A
copper ion binding (GO:0005507)	0.0153519	0.152905	AOC3;SUMF1
calcium ion binding (GO:0005509)	0.0156269	0.152905	AOC3;GALNT3;PLA2G4A;S100P;MICU1
tRNA binding (GO:0000049)	0.0180404	0.152905	MRPS27;IFIT5
complement component C3b binding (GO:0001851)	0.0208263	0.152905	PHB
acyl carnitine transmembrane transporter activity (GO:0015227)	0.0208263	0.152905	SLC25A20
L-histidine transmembrane transporter activity (GO:0005290)	0.0208263	0.152905	SLC38A5
