# Supplementary material for: Comparison between articular chondrocytes and mesenchymal stromal cells for the production of articular cartilage implants
Source: Front Bioeng Biotechnol. 2023 Feb 21;11:1116513. doi: 10.3389/fbioe.2023.1116513 (PMC9989206; doi:10.3389/fbioe.2023.1116513)
Supplement: Supplementary file 4 [file Table4.XLSX]

## Sheet: miRNA sequencing
Differentially expressed miRNAs and isomiRs sorted by highest fold change in AC discs
MiRNA/Seed sequence	Fold Change	FDR	Seed
MIMAT0004597:hsa-miR-140-3p|CCACAGG	34164.1	8.93522e-07	isomiR
MIMAT0000271:hsa-miR-214-3p|GTACAGC	914.766	2.36414e-16	isomiR
MIMAT0000087:hsa-miR-30a-5p|GTAAACA	856.11	1.3413e-05	isomiR
MIMAT0006790:hsa-miR-675-3p|CTGTATG	67.4088	2.23226e-16	Canonical
MIMAT0004563:hsa-miR-199b-3p|CAGTAGT	54.2878	0.0494479	isomiR
MIMAT0004284:hsa-miR-675-5p|TGGTGCG	47.9696	3.37247e-13	Canonical
MIMAT0000765:hsa-miR-335-5p|TCAAGAG	16.0888	5.1201e-07	Canonical
MIMAT0000441:hsa-miR-9-5p|TCTTTGG	9.64081	0.000224596	Canonical
MIMAT0022696:hsa-miR-301a-5p|GCTCTGA	5.62477	0.000460616	Canonical
MIMAT0000688:hsa-miR-301a-3p|CAGTGCA	5.31641	0.00021764	Canonical
MIMAT0003247:hsa-miR-582-5p|TTACAGT	4.68854	0.000716091	Canonical
MIMAT0004797:hsa-miR-582-3p|TAACTGG	4.62548	0.000541047	Canonical
MIMAT0022861:hsa-miR-376c-5p|GTGGATA	3.65377	0.00705732	isomiR
MIMAT0002172:hsa-miR-376b-3p|ATCATAG	3.58884	0.0217055	Canonical
MIMAT0002817:hsa-miR-495-3p|AAACAAA	3.49678	0.0130501	Canonical
MIMAT0003247:hsa-miR-582-5p|TACAGTT	3.35346	0.0113429	isomiR
MIMAT0003386:hsa-miR-376a-5p|GTAGATT	3.34655	0.0168289	Canonical
MIMAT0004606:hsa-miR-136-3p|CATCATC	3.31927	0.0177447	Canonical
MIMAT0000687:hsa-miR-299-3p|TATGTGG	3.29174	0.0168289	Canonical
MIMAT0000458:hsa-miR-190a-5p|TGATATG	3.24662	0.00914317	Canonical
MIMAT0001627:hsa-miR-433-3p|ATCATGA	3.13227	0.0221199	Canonical
MIMAT0003329:hsa-miR-411-5p|TAGTGGA	3.05588	0.0283935	isomiR
MIMAT0000646:hsa-miR-155-5p|TTAATGC	3.04403	0.0339075	Canonical
MIMAT0003329:hsa-miR-411-5p|ATAGTAG	3.04128	0.0177447	isomiR
MIMAT0004921:hsa-miR-889-3p|TTAATAT	2.98594	0.0283886	Canonical
MIMAT0026482:hsa-miR-190a-3p|ACTATAT	2.98204	0.0283886	isomiR
MIMAT0000263:hsa-miR-199b-5p|CCCAGTG	2.97718	0.027034	Canonical
MIMAT0004690:hsa-miR-379-3p|TATGTAA	2.85111	0.0299031	Canonical
MIMAT0004954:hsa-miR-543|AAACATT	2.81975	0.0460788	Canonical
MIMAT0000754:hsa-miR-337-3p|TCCTATA	2.81192	0.0420838	isomiR
MIMAT0004606:hsa-miR-136-3p|ATCATCG	2.79151	0.0373985	isomiR
MIMAT0003879:hsa-miR-758-3p|TTTGTGA	2.78883	0.0335178	Canonical
MIMAT0003885:hsa-miR-454-3p|TAGTGCA	2.73392	0.0331066	Canonical
MIMAT0000425:hsa-miR-130a-3p|CAGTGCA	2.72627	0.0420838	Canonical
MIMAT0001639:hsa-miR-409-3p|GAATGTT	2.64537	0.0488017	Canonical
MIMAT0004813:hsa-miR-411-3p|TATGTAA	2.63433	0.0434639	Canonical
MIMAT0000757:hsa-miR-151a-3p|TACTAGA	-2.67398	0.0494479	isomiR
MIMAT0004501:hsa-miR-27a-5p|AGGGCTT	-2.75218	0.0409562	Canonical
MIMAT0004697:hsa-miR-151a-5p|CTCGAGG	-2.88904	0.0223314	isomiR
MIMAT0011160:hsa-miR-2116-5p|GGTTCTT	-2.95212	0.027034	Canonical
MIMAT0000731:hsa-miR-378a-5p|CTCCTGA	-3.05671	0.0212343	Canonical
MIMAT0019805:hsa-miR-4705|TCAATCA	-3.13869	0.0401114	Canonical
MIMAT0015062:hsa-miR-3182|GTTTCCG	-3.17283	0.0340177	isomiR
MIMAT0022272:hsa-miR-664b-3p|TTCATTT	-3.42107	0.00705732	Canonical
MIMAT0000732:hsa-miR-378a-3p|CTGGACT	-3.56841	0.00657302	isomiR
MIMAT0004809:hsa-miR-628-5p|ATGCTGA	-3.70332	0.003466	Canonical
MIMAT0003218:hsa-miR-92b-3p|TATTGCA	-4.35012	0.000793477	Canonical
MIMAT0000732:hsa-miR-378a-3p|ACTGGAC	-4.4478	0.00202547	Canonical
MIMAT0000430_1:hsa-miR-138-5p|AGCTGGT	-4.56575	0.0048672	Canonical
MIMAT0019017:hsa-miR-4483|GGTGTGG	-4.67075	0.02293	isomiR
MIMAT0000104:hsa-miR-107|AGCAGCA	-4.71352	0.00516664	Canonical
MIMAT0018966:hsa-miR-4447|GGTGTGG	-4.73315	0.0299031	isomiR
MIMAT0003297:hsa-miR-628-3p|TTCTAGT	-4.80751	0.000577421	isomiR
MIMAT0018966:hsa-miR-4447|TGGTGTG	-5.35256	0.01495	isomiR
MIMAT0000259:hsa-miR-182-5p|TTTGGCA	-5.47612	0.000302872	Canonical
MIMAT0019017:hsa-miR-4483|TGGTGTG	-5.56839	0.00657302	isomiR
MIMAT0015062:hsa-miR-3182|GCTTCTG	-6.03599	0.000540026	Canonical
MIMAT0004607:hsa-miR-138-1-3p|GCTACTT	-6.26948	0.000161599	Canonical
MIMAT0000758:hsa-miR-135b-5p|TATGGCT	-6.38356	0.000103558	Canonical
MIMAT0022692:hsa-miR-181b-3p|CTCACTG	-6.90621	0.000274564	Canonical
MIMAT0000270:hsa-miR-181a-3p|ACCATCG	-7.89461	0.000101421	Canonical
MIMAT0015041:hsa-miR-1260b|ATCCCAC	-7.971	0.000231899	Canonical
MIMAT0014996:hsa-miR-3131|TCGAGGA	-7.97111	0.00206167	Canonical
MIMAT0000256:hsa-miR-181a-5p|AACATTC	-8.58878	0.000101421	Canonical
MIMAT0003266:hsa-miR-598-3p|TACGTCA	-9.19858	8.31218e-05	Canonical
MIMAT0000275:hsa-miR-218-5p|TTGTGCT	-9.38146	0.000433575	Canonical
MIMAT0000257:hsa-miR-181b-5p|AACATTC	-10.1055	3.43367e-05	Canonical
MIMAT0002875:hsa-miR-504-5p|AGACCCT	-12.1964	9.35541e-06	Canonical
MIMAT0000257:hsa-miR-181b-5p|CAACATT	-12.3627	1.2295e-07	isomiR
MIMAT0000257:hsa-miR-181b-5p|ACATTCA	-13.3105	1.80555e-07	isomiR
MIMAT0000449:hsa-miR-146a-5p|TGAGAAC	-27.6175	8.10436e-11	Canonical
MIMAT0015081_1:hsa-miR-548x-3p|TAAAAAC	-131.421	3.37247e-13	Canonical
MIMAT0000253:hsa-miR-10a-5p|TACCCTG	-176.481	5.25098e-27	Canonical
MIMAT0004555:hsa-miR-10a-3p|CAAATTC	-418.223	8.33959e-26	Canonical
MIMAT0000253:hsa-miR-10a-5p|ACCCTGT	-444.935	5.97698e-31	isomiR
MIMAT0000510:hsa-miR-320a-3p|AAAGCTG	-1516.68	8.00851e-06	isomiR
