# Supplementary material for: Comparison between articular chondrocytes and mesenchymal stromal cells for the production of articular cartilage implants
Source: Front Bioeng Biotechnol. 2023 Feb 21;11:1116513. doi: 10.3389/fbioe.2023.1116513 (PMC9989206; doi:10.3389/fbioe.2023.1116513)
Supplement: Supplementary file 5 [file Table1.XLSX]

## Sheet: IBAQ
Proteins identified in full proteome analysis and sorted by highest IBAQ expression levels for each disc type
Protein name	Gene symbol	IBAQ AVG AC			Protein name	Gene symbol	IBAQ AVG MSC
Vimentin	VIM	2.72247e+09			Protein S100-A1	S100A1	3942980000
Actin, cytoplasmic 2;Actin, cytoplasmic 2, N-terminally processed	ACTG1	2541700000			Fibromodulin	FMOD	2756500000
Biglycan	BGN	2430700000			Actin, cytoplasmic 2;Actin, cytoplasmic 2, N-terminally processed	ACTG1	2523500000
Protein S100-A1	S100A1	2249500000			Vimentin	VIM	2.41547e+09
Fibromodulin	FMOD	1880900000			Biglycan	BGN	2.33914e+09
Aggrecan core protein;Aggrecan core protein 2	ACAN	1.37337e+09			Aggrecan core protein;Aggrecan core protein 2	ACAN	1496190000
Tenascin	TNC	9.17263e+08			Glyceraldehyde-3-phosphate dehydrogenase	GAPDH	1.45011e+09
Annexin A2;Putative annexin A2-like protein	ANXA2;ANXA2P2	828270000			Annexin A5	ANXA5	1.19194e+09
Glyceraldehyde-3-phosphate dehydrogenase	GAPDH	8.20817e+08			Protein S100-P	S100P	1.19047e+09
Tubulin alpha-1A chain;Tubulin alpha-3E chain	TUBA1A;TUBA3E	7.14183e+08			Hyaluronan and proteoglycan link protein 1	HAPLN1	1088040000
Prolargin	PRELP	7.09547e+08			Annexin A2;Putative annexin A2-like protein	ANXA2;ANXA2P2	1.05097e+09
Hyaluronan and proteoglycan link protein 1	HAPLN1	6.50227e+08			Prolargin	PRELP	1032690000
Alpha-enolase	ENO1	618530000			Tubulin alpha-1A chain;Tubulin alpha-3E chain	TUBA1A;TUBA3E	9.45937e+08
Tubulin beta-4B chain	TUBB4B	609770000			Inorganic pyrophosphatase	PPA1	8.72633e+08
Calreticulin	CALR	5.59527e+08			Heat shock protein beta-1	HSPB1	8.26047e+08
60S acidic ribosomal protein P1	RPLP1	5.53307e+08			Tubulin beta-4B chain	TUBB4B	769440000
Annexin A5	ANXA5	5.36213e+08			Creatine kinase B-type	CKB	714420000
Creatine kinase B-type	CKB	5.29227e+08			Alpha-crystallin B chain	CRYAB	7.13217e+08
Thrombospondin-1	THBS1	524500000			Thymosin beta-10	TMSB10	707300000
Cartilage oligomeric matrix protein	COMP	511400000			Alpha-enolase	ENO1	6.41317e+08
Insulin;Insulin B chain;Insulin A chain;Insulin, isoform 2	INS;INS-IGF2	5.06277e+08			60S acidic ribosomal protein P1	RPLP1	6.34267e+08
Alpha-crystallin B chain	CRYAB	4.77213e+08			Serpin H1	SERPINH1	6.30987e+08
Thymosin beta-10	TMSB10	4.71587e+08			60S acidic ribosomal protein P2	RPLP2	624550000
60S acidic ribosomal protein P2	RPLP2	4.66227e+08			14-3-3 protein theta	YWHAQ	615870000
Histone H2B type 1-L;Histone H2B type 1-M;Histone H2B type 1-N;Histone H2B type 1-H;Histone H2B type 2-F;Histone H2B type 1-C/E/F/G/I;Histone H2B type 1-D;Histone H2B type F-S;Histone H2B type 1-K;Histone H2B type 1-A	HIST1H2BL;HIST1H2BM;HIST1H2BN;HIST1H2BH;HIST2H2BF;HIST1H2BC;HIST1H2BD;H2BFS;HIST1H2BK;HIST1H2BA	453860000			78 kDa glucose-regulated protein	HSPA5	583750000
Chondroadherin	CHAD	447330000			Calreticulin	CALR	559600000
Serpin H1	SERPINH1	4.40337e+08			Insulin;Insulin B chain;Insulin A chain;Insulin, isoform 2	INS;INS-IGF2	5.37573e+08
L-lactate dehydrogenase A chain	LDHA	418740000			Ubiquitin-40S ribosomal protein S27a;Ubiquitin;40S ribosomal protein S27a;Ubiquitin-60S ribosomal protein L40;Ubiquitin;60S ribosomal protein L40;Polyubiquitin-B;Ubiquitin;Polyubiquitin-C;Ubiquitin	RPS27A;UBA52;UBB;UBC	534500000
Collagen alpha-1(XII) chain	COL12A1	4.13853e+08			Decorin	DCN	5.30713e+08
Elongation factor 1-alpha 1;Putative elongation factor 1-alpha-like 3	EEF1A1;EEF1A1P5	4.01293e+08			Pyruvate kinase PKM	PKM	5.23153e+08
78 kDa glucose-regulated protein	HSPA5	3.99633e+08			Elongation factor 1-alpha 1;Putative elongation factor 1-alpha-like 3	EEF1A1;EEF1A1P5	5.08883e+08
SPARC	SPARC	3.97143e+08			L-lactate dehydrogenase A chain	LDHA	4.91963e+08
Protein disulfide-isomerase	P4HB	383510000			Triosephosphate isomerase	TPI1	469890000
Heat shock protein beta-1	HSPB1	3.74513e+08			Thrombospondin-1	THBS1	4.63077e+08
Galectin-1	LGALS1	3.62367e+08			Chondroadherin	CHAD	4.21847e+08
Matrilin-3	MATN3	3.58627e+08			Protein disulfide-isomerase	P4HB	4.20057e+08
Triosephosphate isomerase	TPI1	3.56323e+08			14-3-3 protein epsilon	YWHAE	407600000
Pyruvate kinase PKM	PKM	3.55603e+08			Histone H2B type 1-L;Histone H2B type 1-M;Histone H2B type 1-N;Histone H2B type 1-H;Histone H2B type 2-F;Histone H2B type 1-C/E/F/G/I;Histone H2B type 1-D;Histone H2B type F-S;Histone H2B type 1-K;Histone H2B type 1-A	HIST1H2BL;HIST1H2BM;HIST1H2BN;HIST1H2BH;HIST2H2BF;HIST1H2BC;HIST1H2BD;H2BFS;HIST1H2BK;HIST1H2BA	3.90227e+08
Protein disulfide-isomerase A3	PDIA3	355240000			Reticulocalbin-3	RCN3	3.84217e+08
Endoplasmin	HSP90B1	348510000			Serum albumin	ALB	3.81147e+08
14-3-3 protein theta	YWHAQ	3.47547e+08			Peptidyl-prolyl cis-trans isomerase A;Peptidyl-prolyl cis-trans isomerase A, N-terminally processed	PPIA	3.75503e+08
Ubiquitin-40S ribosomal protein S27a;Ubiquitin;40S ribosomal protein S27a;Ubiquitin-60S ribosomal protein L40;Ubiquitin;60S ribosomal protein L40;Polyubiquitin-B;Ubiquitin;Polyubiquitin-C;Ubiquitin	RPS27A;UBA52;UBB;UBC	3.40587e+08			Cathepsin D;Cathepsin D light chain;Cathepsin D heavy chain	CTSD	365720000
Reticulocalbin-3	RCN3	314580000			Annexin A1	ANXA1	3.46397e+08
Peptidyl-prolyl cis-trans isomerase A;Peptidyl-prolyl cis-trans isomerase A, N-terminally processed	PPIA	3.08833e+08			Histone H4	HIST1H4A	3.45317e+08
Serum albumin	ALB	3.05003e+08			Cofilin-1	CFL1	3.42573e+08
Periostin	POSTN	297910000			Eukaryotic translation initiation factor 5A-1;Eukaryotic translation initiation factor 5A-1-like	EIF5A;EIF5AL1	335440000
Cofilin-1	CFL1	2.89617e+08			Reticulocalbin-1	RCN1	3.32027e+08
14-3-3 protein epsilon	YWHAE	2.86683e+08			Matrilin-3	MATN3	3.26427e+08
Protein S100-B	S100B	285060000			Protein canopy homolog 2	CNPY2	3.25613e+08
Protein disulfide-isomerase A6	PDIA6	277350000			Destrin	DSTN	324830000
Histone H4	HIST1H4A	2.73767e+08			14-3-3 protein zeta/delta	YWHAZ	323610000
Thymosin beta-4;Hematopoietic system regulatory peptide	TMSB4X	2.73123e+08			Lactadherin;Lactadherin short form;Medin	MFGE8	306470000
Fatty acid-binding protein, epidermal	FABP5	2.70903e+08			Nucleoside diphosphate kinase B;Putative nucleoside diphosphate kinase	NME2;NME2P1	3.00677e+08
Histone H2A type 1-J;Histone H2A type 1-H;Histone H2A.J;Histone H2A type 2-C;Histone H2A type 1-C;Histone H2A type 3;Histone H2A type 2-A;Histone H2A type 1-D;Histone H2A type 1;Histone H2A type 1-B/E	HIST1H2AJ;HIST1H2AH;H2AFJ;HIST2H2AC;HIST1H2AC;HIST3H2A;HIST2H2AA3;HIST1H2AD;HIST1H2AG;HIST1H2AB	269220000			Elongation factor 1-delta	EEF1D	2.99453e+08
Actin, aortic smooth muscle;Actin, gamma-enteric smooth muscle	ACTA2;ACTG2	268670000			Protein disulfide-isomerase A3	PDIA3	295230000
Calumenin	CALU	2.60027e+08			Galectin-1	LGALS1	2.92687e+08
Destrin	DSTN	2.58283e+08			Histone H3.3	H3F3A	2.81497e+08
Histone H2A.V;Histone H2A.Z	H2AFV;H2AFZ	2.54817e+08			Protein disulfide-isomerase A6	PDIA6	2.78607e+08
Peptidyl-prolyl cis-trans isomerase B	PPIB	246750000			Collagen alpha-1(XII) chain	COL12A1	2.71537e+08
Phosphoglycerate kinase 1	PGK1	2.42573e+08			Profilin-1	PFN1	2.69937e+08
Phosphatidylethanolamine-binding protein 1;Hippocampal cholinergic neurostimulating peptide	PEBP1	2.29707e+08			Calumenin	CALU	2.67547e+08
Profilin-1	PFN1	224780000			Prolyl 4-hydroxylase subunit alpha-2	P4HA2	265930000
Macrophage migration inhibitory factor	MIF	210980000			Phosphoglycerate kinase 1	PGK1	261680000
Reticulocalbin-1	RCN1	209150000			Endoplasmin	HSP90B1	2.61377e+08
Annexin A1	ANXA1	1.99857e+08			Macrophage migration inhibitory factor	MIF	2.56259e+08
14-3-3 protein zeta/delta	YWHAZ	199770000			Gelsolin	GSN	256080000
Glutathione S-transferase P	GSTP1	198980000			UTP--glucose-1-phosphate uridylyltransferase	UGP2	2.50233e+08
Protein canopy homolog 2	CNPY2	195630000			Superoxide dismutase [Cu-Zn]	SOD1	250160000
40S ribosomal protein SA	RPSA	1.94793e+08			Phosphatidylethanolamine-binding protein 1;Hippocampal cholinergic neurostimulating peptide	PEBP1	2.43357e+08
Eukaryotic translation initiation factor 5A-1;Eukaryotic translation initiation factor 5A-1-like	EIF5A;EIF5AL1	1.94563e+08			Heat shock protein HSP 90-beta	HSP90AB1	241360000
Peroxiredoxin-4	PRDX4	1.91827e+08			Heat shock cognate 71 kDa protein	HSPA8	2.41123e+08
Superoxide dismutase [Cu-Zn]	SOD1	183070000			Fatty acid-binding protein, epidermal	FABP5	2.38087e+08
Nucleoside diphosphate kinase B;Putative nucleoside diphosphate kinase	NME2;NME2P1	1.81703e+08			L-lactate dehydrogenase B chain	LDHB	235250000
C-type lectin domain family 3 member A	CLEC3A	1.77127e+08			Actin, aortic smooth muscle;Actin, gamma-enteric smooth muscle	ACTA2;ACTG2	2.34997e+08
Gelsolin	GSN	1.72237e+08			ATP synthase subunit beta, mitochondrial	ATP5B	2.33693e+08
Myosin light polypeptide 6	MYL6	1.64437e+08			SPARC	SPARC	231785000
Spermidine synthase	SRM	1.63103e+08			Spermidine synthase	SRM	230165000
Rho GDP-dissociation inhibitor 1	ARHGDIA	1.62627e+08			Alkaline phosphatase, tissue-nonspecific isozyme	ALPL	227370000
Phosphoglycerate mutase 1	PGAM1	162109000			C-type lectin domain family 3 member A	CLEC3A	222803000
Heat shock protein HSP 90-beta	HSP90AB1	1.62037e+08			Rho GDP-dissociation inhibitor 1	ARHGDIA	2.16447e+08
Fructose-bisphosphate aldolase A	ALDOA	1.61133e+08			40S ribosomal protein SA	RPSA	211360000
Heat shock cognate 71 kDa protein	HSPA8	1.60467e+08			Elongation factor 2	EEF2	2.11327e+08
Tubulin beta-2A chain	TUBB2A	1.55977e+08			40S ribosomal protein S8	RPS8	208860000
Fibronectin;Anastellin;Ugl-Y1;Ugl-Y2;Ugl-Y3	FN1	153007000			Tubulin beta-2A chain	TUBB2A	2.08077e+08
Elongation factor 1-delta	EEF1D	1.52563e+08			Thioredoxin	TXN	2.06537e+08
Tropomyosin alpha-4 chain	TPM4	1.52107e+08			Phosphoglycerate mutase 1	PGAM1	2.05363e+08
Prolyl 4-hydroxylase subunit alpha-2	P4HA2	1.49673e+08			Peroxiredoxin-4	PRDX4	2.03445e+08
L-lactate dehydrogenase B chain	LDHB	1.45677e+08			Cartilage oligomeric matrix protein	COMP	200702000
40S ribosomal protein S14	RPS14	1.41567e+08			Elongation factor 1-beta	EEF1B2	2.00207e+08
Collagen alpha-1(II) chain;Collagen alpha-1(II) chain;Chondrocalcin	COL2A1	137958000			Myosin light polypeptide 6	MYL6	1.95543e+08
40S ribosomal protein S12	RPS12	1.35293e+08			40S ribosomal protein S12	RPS12	1.95493e+08
Tubulin beta chain	TUBB	1.34217e+08			Ribonuclease inhibitor	RNH1	1.94583e+08
Thioredoxin	TXN	132257000			Protein deglycase DJ-1	PARK7	1.94043e+08
Lactadherin;Lactadherin short form;Medin	MFGE8	1.29067e+08			Peptidyl-prolyl cis-trans isomerase B	PPIB	193750000
Alpha-actinin-4	ACTN4	128030000			Peroxiredoxin-1	PRDX1	1.89237e+08
60S ribosomal protein L22	RPL22	125090000			Fructose-bisphosphate aldolase A	ALDOA	1.88336e+08
Tropomyosin beta chain	TPM2	1.25001e+08			Tubulin beta chain	TUBB	1.85953e+08
Protein S100-A13	S100A13	122329000			Alpha-actinin-4	ACTN4	185510000
Prolyl 4-hydroxylase subunit alpha-1	P4HA1	121732000			Histone H2A type 1-J;Histone H2A type 1-H;Histone H2A.J;Histone H2A type 2-C;Histone H2A type 1-C;Histone H2A type 3;Histone H2A type 2-A;Histone H2A type 1-D;Histone H2A type 1;Histone H2A type 1-B/E	HIST1H2AJ;HIST1H2AH;H2AFJ;HIST2H2AC;HIST1H2AC;HIST3H2A;HIST2H2AA3;HIST1H2AD;HIST1H2AG;HIST1H2AB	183930000
Decorin	DCN	115112000			60S ribosomal protein L22	RPL22	1.77537e+08
Prelamin-A/C;Lamin-A/C	LMNA	1.15072e+08			Protein S100-B	S100B	1.75676e+08
Bifunctional 3-phosphoadenosine 5-phosphosulfate synthase 2;Sulfate adenylyltransferase;Adenylyl-sulfate kinase	PAPSS2	113517000			Histone H2A.V;Histone H2A.Z	H2AFV;H2AFZ	1.73477e+08
Angiopoietin-related protein 7	ANGPTL7	1.13515e+08			Protein S100-A13	S100A13	172829000
Cytoskeleton-associated protein 4	CKAP4	1.1337e+08			Nucleophosmin	NPM1	1.69937e+08
Histone H3.3	H3F3A	1.12687e+08			Prelamin-A/C;Lamin-A/C	LMNA	166460000
Nucleophosmin	NPM1	1.1213e+08			Protein S100-A11;Protein S100-A11, N-terminally processed	S100A11	166118000
Protein S100-A11;Protein S100-A11, N-terminally processed	S100A11	1.10068e+08			60S acidic ribosomal protein P0;60S acidic ribosomal protein P0-like	RPLP0;RPLP0P6	161130000
40S ribosomal protein S8	RPS8	1.09978e+08			Phosphoserine aminotransferase	PSAT1	1.59006e+08
ATP synthase subunit beta, mitochondrial	ATP5B	1.08807e+08			Peroxiredoxin-6	PRDX6	1.54575e+08
Acyl-CoA-binding protein	DBI	1.08097e+08			Glutathione S-transferase P	GSTP1	1.53149e+08
Peroxiredoxin-1	PRDX1	1.06755e+08			Elongation factor 1-gamma	EEF1G	1.52589e+08
Mimecan	OGN	1.04472e+08			Peroxiredoxin-5, mitochondrial	PRDX5	1.52078e+08
Elongation factor 1-beta	EEF1B2	1.04044e+08			Cytoskeleton-associated protein 4	CKAP4	1.5174e+08
Protein deglycase DJ-1	PARK7	1.03463e+08			60S ribosomal protein L7	RPL7	150985000
60S acidic ribosomal protein P0;60S acidic ribosomal protein P0-like	RPLP0;RPLP0P6	1.03316e+08			Fibronectin;Anastellin;Ugl-Y1;Ugl-Y2;Ugl-Y3	FN1	1.49207e+08
UTP--glucose-1-phosphate uridylyltransferase	UGP2	102812000			40S ribosomal protein S14	RPS14	1.47694e+08
Glucosidase 2 subunit beta	PRKCSH	1.01332e+08			ADP-ribosylation factor 1;ADP-ribosylation factor 3	ARF1;ARF3	1.43048e+08
Chloride intracellular channel protein 4	CLIC4	1.00327e+08			CD81 antigen	CD81	1.39149e+08
40S ribosomal protein S28	RPS28	9.91733e+07			Branched-chain-amino-acid aminotransferase, cytosolic	BCAT1	1.38197e+08
Transitional endoplasmic reticulum ATPase	VCP	9.84183e+07			Transitional endoplasmic reticulum ATPase	VCP	1.36685e+08
Elongation factor 2	EEF2	9.81833e+07			Voltage-dependent anion-selective channel protein 1	VDAC1	1.35452e+08
Dihydropyrimidinase-related protein 2	DPYSL2	9.68387e+07			60S ribosomal protein L7a	RPL7A	1.3384e+08
Metallothionein-1X	MT1X	9.62183e+07			ATP synthase subunit alpha, mitochondrial	ATP5A1	1.33569e+08
UMP-CMP kinase	CMPK1	9.54903e+07			60 kDa heat shock protein, mitochondrial	HSPD1	1.32787e+08
Ribonuclease inhibitor	RNH1	9.33523e+07			Moesin	MSN	1.32082e+08
Peroxiredoxin-6	PRDX6	93218000			60S ribosomal protein L4	RPL4	1.31963e+08
60S ribosomal protein L12	RPL12	9.22297e+07			Collagen alpha-1(II) chain;Collagen alpha-1(II) chain;Chondrocalcin	COL2A1	1.3035e+08
Peptidyl-prolyl cis-trans isomerase FKBP10	FKBP10	91828000			Translationally-controlled tumor protein	TPT1	1.29609e+08
Peroxiredoxin-2	PRDX2	9.13817e+07			14-3-3 protein beta/alpha;14-3-3 protein beta/alpha, N-terminally processed	YWHAB	1.28503e+08
SH3 domain-binding glutamic acid-rich-like protein 3	SH3BGRL3	9.02453e+07			Hyaluronan and proteoglycan link protein 3	HAPLN3	126759000
60S ribosomal protein L30	RPL30	8.91543e+07			Chloride intracellular channel protein 4	CLIC4	125684000
Thioredoxin domain-containing protein 5	TXNDC5	8.79407e+07			Transaldolase	TALDO1	1.2565e+08
Reticulocalbin-2	RCN2	8.67453e+07			SH3 domain-binding glutamic acid-rich-like protein 3	SH3BGRL3	1.2473e+08
ADP-ribosylation factor 1;ADP-ribosylation factor 3	ARF1;ARF3	86589000			Glucosidase 2 subunit beta	PRKCSH	123406000
Protein S100-A6	S100A6	8.64393e+07			Rab GDP dissociation inhibitor beta	GDI2	122635000
14-3-3 protein beta/alpha;14-3-3 protein beta/alpha, N-terminally processed	YWHAB	8.50043e+07			Prolyl 4-hydroxylase subunit alpha-1	P4HA1	1.21936e+08
Rab GDP dissociation inhibitor beta	GDI2	8.48553e+07			Malate dehydrogenase, cytoplasmic	MDH1	1.21552e+08
Myosin regulatory light chain 12A;Myosin regulatory light chain 12B	MYL12A;MYL12B	84073000			Bifunctional 3-phosphoadenosine 5-phosphosulfate synthase 2;Sulfate adenylyltransferase;Adenylyl-sulfate kinase	PAPSS2	1.20608e+08
SPARC-related modular calcium-binding protein 2	SMOC2	8.27127e+07			Adseverin	SCIN	120165000
Annexin A6	ANXA6	8.21923e+07			Peptidyl-prolyl cis-trans isomerase FKBP10	FKBP10	1.19339e+08
Peroxiredoxin-5, mitochondrial	PRDX5	78105000			60S ribosomal protein L30	RPL30	1.1926e+08
Cytokine-like protein 1	CYTL1	7.76607e+07			Tropomyosin alpha-4 chain	TPM4	116787000
Chloride intracellular channel protein 1	CLIC1	7.71203e+07			Galectin-3	LGALS3	1.15705e+08
Elongation factor 1-gamma	EEF1G	7.60183e+07			Peroxiredoxin-2	PRDX2	1.11048e+08
60S ribosomal protein L9	RPL9	7.59073e+07			Protein S100-A6	S100A6	110078000
Copper chaperone for superoxide dismutase	CCS	7.58343e+07			Tenascin	TNC	1.0967e+08
Adseverin	SCIN	7.57847e+07			NADH-cytochrome b5 reductase 3;NADH-cytochrome b5 reductase 3 membrane-bound form;NADH-cytochrome b5 reductase 3 soluble form	CYB5R3	1.07764e+08
Guanine nucleotide-binding protein subunit beta-2-like 1;Guanine nucleotide-binding protein subunit beta-2-like 1, N-terminally processed	GNB2L1	75225000			UMP-CMP kinase	CMPK1	1.06282e+08
UDP-glucose 6-dehydrogenase	UGDH	74027000			60S ribosomal protein L12	RPL12	105500000
Protein S100-A10	S100A10	7.32163e+07			60S ribosomal protein L23a	RPL23A	102923000
Moesin	MSN	7.26223e+07			60S ribosomal protein L36	RPL36	1.02443e+08
NADH-cytochrome b5 reductase 3;NADH-cytochrome b5 reductase 3 membrane-bound form;NADH-cytochrome b5 reductase 3 soluble form	CYB5R3	7.16127e+07			Thioredoxin domain-containing protein 5	TXNDC5	1.01884e+08
Putative 60S ribosomal protein L39-like 5;60S ribosomal protein L39	RPL39P5;RPL39	7.10537e+07			Chloride intracellular channel protein 1	CLIC1	1.01208e+08
Cathepsin D;Cathepsin D light chain;Cathepsin D heavy chain	CTSD	71049000			Acyl-CoA-binding protein	DBI	101024000
Actin, cytoplasmic 1;Actin, cytoplasmic 1, N-terminally processed	ACTB	70477000			Eukaryotic initiation factor 4A-I	EIF4A1	100777000
Myosin-9	MYH9	7.01743e+07			60S ribosomal protein L9	RPL9	9.89337e+07
Protein SET;Protein SETSIP	SET;SETSIP	6.89773e+07			60S ribosomal protein L27	RPL27	9.83253e+07
Hyaluronan and proteoglycan link protein 3	HAPLN3	68906000			Tropomyosin beta chain	TPM2	9.61187e+07
Neutral alpha-glucosidase AB	GANAB	68507000			40S ribosomal protein S28	RPS28	9.54437e+07
Galectin-3	LGALS3	6.73433e+07			Beta-actin-like protein 2	ACTBL2	9.49307e+07
Nuclease-sensitive element-binding protein 1	YBX1	65868000			CD109 antigen	CD109	9.42597e+07
Prolyl 3-hydroxylase 1	LEPRE1	6.58457e+07			Cystatin-B	CSTB	93306000
Translationally-controlled tumor protein	TPT1	6.57237e+07			Guanine nucleotide-binding protein subunit beta-2-like 1;Guanine nucleotide-binding protein subunit beta-2-like 1, N-terminally processed	GNB2L1	9.26187e+07
Inorganic pyrophosphatase	PPA1	65209000			Putative 60S ribosomal protein L39-like 5;60S ribosomal protein L39	RPL39P5;RPL39	92292000
Heat shock protein beta-6	HSPB6	6.51473e+07			Neutral alpha-glucosidase AB	GANAB	9.13717e+07
60S ribosomal protein L27a	RPL27A	6.26327e+07			Translocon-associated protein subunit delta	SSR4	9.01197e+07
Translocon-associated protein subunit delta	SSR4	6.20873e+07			Multiple coagulation factor deficiency protein 2	MCFD2	8.87603e+07
60S ribosomal protein L7	RPL7	6.15603e+07			Endoplasmic reticulum resident protein 29	ERP29	8.84253e+07
CD99 antigen	CD99	6.15257e+07			Protein SET;Protein SETSIP	SET;SETSIP	8.83277e+07
60S ribosomal protein L36	RPL36	6.10547e+07			60S ribosomal protein L27a	RPL27A	88300000
60 kDa heat shock protein, mitochondrial	HSPD1	6.06783e+07			Ezrin	EZR	8.77303e+07
60S ribosomal protein L23a	RPL23A	6.04333e+07			Matrilin-4	MATN4	87404000
40S ribosomal protein S25	RPS25	6.03937e+07			Leucine-rich repeat-containing protein 59	LRRC59	8.64213e+07
Prothymosin alpha;Prothymosin alpha, N-terminally processed;Thymosin alpha-1	PTMA	6.01933e+07			Reticulocalbin-2	RCN2	8.61883e+07
Alkaline phosphatase, tissue-nonspecific isozyme	ALPL	60015000			Thymosin beta-4;Hematopoietic system regulatory peptide	TMSB4X	8.48997e+07
Heterogeneous nuclear ribonucleoprotein K	HNRNPK	5.93547e+07			ADP-ribosylation factor 4	ARF4	84807000
Cystatin-B	CSTB	59308000			60S ribosomal protein L13	RPL13	84126000
Phosphoserine aminotransferase	PSAT1	5.87933e+07			Myosin regulatory light chain 12A;Myosin regulatory light chain 12B	MYL12A;MYL12B	8.30233e+07
Eukaryotic initiation factor 4A-I	EIF4A1	5.83223e+07			Nicotinamide N-methyltransferase	NNMT	82898000
Complement component 1 Q subcomponent-binding protein, mitochondrial	C1QBP	5.68747e+07			EF-hand domain-containing protein D1	EFHD1	8.20563e+07
40S ribosomal protein S20	RPS20	56308000			Dolichyl-diphosphooligosaccharide--protein glycosyltransferase subunit 2	RPN2	81993000
Leucine-rich repeat-containing protein 59	LRRC59	5.61563e+07			Malate dehydrogenase, mitochondrial	MDH2	8.09467e+07
Acidic leucine-rich nuclear phosphoprotein 32 family member A	ANP32A	5.61263e+07			Nascent polypeptide-associated complex subunit alpha;Nascent polypeptide-associated complex subunit alpha, muscle-specific form	NACA	8.00747e+07
60S ribosomal protein L4	RPL4	5.60157e+07			Myotrophin	MTPN	7.99807e+07
ATP synthase subunit alpha, mitochondrial	ATP5A1	55797000			Nuclease-sensitive element-binding protein 1	YBX1	7.96613e+07
14-3-3 protein gamma;14-3-3 protein gamma, N-terminally processed	YWHAG	55689000			Bone morphogenetic protein 2	BMP2	7.95187e+07
60S ribosomal protein L27	RPL27	5.49027e+07			60S ribosomal protein L18	RPL18	7.92957e+07
60S ribosomal protein L7a	RPL7A	54853000			Dihydropyrimidinase-related protein 2	DPYSL2	7.81527e+07
Gamma-enolase	ENO2	5.47293e+07			40S ribosomal protein S7	RPS7	7.74367e+07
Transforming growth factor-beta-induced protein ig-h3	TGFBI	5.46717e+07			Copper transport protein ATOX1	ATOX1	77083000
Protein disulfide-isomerase A4	PDIA4	54578000			F-actin-capping protein subunit alpha-1	CAPZA1	7.60133e+07
F-actin-capping protein subunit alpha-1	CAPZA1	5.40323e+07			Myosin-9	MYH9	7.58003e+07
Nuclear transport factor 2	NUTF2	5.38753e+07			Tryptophan--tRNA ligase, cytoplasmic;T1-TrpRS;T2-TrpRS	WARS	7.54613e+07
D-3-phosphoglycerate dehydrogenase	PHGDH	5.38187e+07			Protein S100-A10	S100A10	7.51637e+07
Transaldolase	TALDO1	5.35137e+07			Clathrin heavy chain 1	CLTC	7.43337e+07
Plastin-3	PLS3	5.30867e+07			Prosaposin;Saposin-A;Saposin-B-Val;Saposin-B;Saposin-C;Saposin-D	PSAP	73649000
Filamin-A	FLNA	52713000			60S ribosomal protein L8	RPL8	73060000
Collagen alpha-3(VI) chain	COL6A3	52276000			Perilipin-3	PLIN3	73051000
Nicotinamide N-methyltransferase	NNMT	51690000			Actin, cytoplasmic 1;Actin, cytoplasmic 1, N-terminally processed	ACTB	7.25627e+07
40S ribosomal protein S7	RPS7	5.15927e+07			40S ribosomal protein S25	RPS25	7.24147e+07
Voltage-dependent anion-selective channel protein 1	VDAC1	5.11603e+07			Acidic leucine-rich nuclear phosphoprotein 32 family member A	ANP32A	72413000
Collagen alpha-1(VI) chain	COL6A1	50115000			60S ribosomal protein L17	RPL17	72351000
Malate dehydrogenase, cytoplasmic	MDH1	49990000			40S ribosomal protein S26;Putative 40S ribosomal protein S26-like 1	RPS26;RPS26P11	71559000
Myotrophin	MTPN	49751000			Nucleoside diphosphate kinase A	NME1	71480000
Dermatopontin	DPT	49745000			Copper chaperone for superoxide dismutase	CCS	7.11027e+07
Endoplasmic reticulum resident protein 29	ERP29	4.96777e+07			Glycogen phosphorylase, brain form	PYGB	7.00333e+07
40S ribosomal protein S3	RPS3	49375000			60S ribosomal protein L6	RPL6	6.98723e+07
40S ribosomal protein S21	RPS21	4.91757e+07			40S ribosomal protein S6	RPS6	6.96273e+07
Chondroitin sulfate proteoglycan 4	CSPG4	4.87503e+07			60S ribosomal protein L5	RPL5	69033000
Proteasome subunit alpha type-5	PSMA5	4.86023e+07			6-phosphogluconolactonase	PGLS	6.90313e+07
Protein S100-P	S100P	4.83037e+07			Heat shock protein HSP 90-alpha	HSP90AA1	68923000
Dolichyl-diphosphooligosaccharide--protein glycosyltransferase subunit 2	RPN2	48103000			Proteasome subunit beta type-6	PSMB6	6.86907e+07
Plectin	PLEC	4.79907e+07			Prolyl 3-hydroxylase 1	LEPRE1	6.83197e+07
Nascent polypeptide-associated complex subunit alpha;Nascent polypeptide-associated complex subunit alpha, muscle-specific form	NACA	4.79607e+07			40S ribosomal protein S30	FAU	6.80667e+07
Transgelin-2	TAGLN2	4.73883e+07			4F2 cell-surface antigen heavy chain	SLC3A2	6.79593e+07
Heterogeneous nuclear ribonucleoproteins A2/B1	HNRNPA2B1	4.70857e+07			Plastin-3	PLS3	6.78897e+07
Basement membrane-specific heparan sulfate proteoglycan core protein;Endorepellin;LG3 peptide	HSPG2	4.65473e+07			Actin-related protein 3	ACTR3	6.72083e+07
ADP-ribosylation factor 4	ARF4	46071000			Transforming protein RhoA;Rho-related GTP-binding protein RhoC	RHOA;RHOC	6.71753e+07
Histone H3.1;Histone H3.1t	HIST1H3A;HIST3H3	46042000			CD99 antigen	CD99	6.70877e+07
Tumor protein D54	TPD52L2	45980000			Procollagen-lysine,2-oxoglutarate 5-dioxygenase 2	PLOD2	6.66973e+07
Coatomer subunit epsilon	COPE	4.59683e+07			Protein SEC13 homolog	SEC13	66216000
Alpha-actinin-1	ACTN1	4.56633e+07			40S ribosomal protein S18	RPS18	66028000
Branched-chain-amino-acid aminotransferase, cytosolic	BCAT1	45225000			Peptidyl-prolyl cis-trans isomerase FKBP1A	FKBP1A	6.59557e+07
Poly(rC)-binding protein 1	PCBP1	45023000			Proteasome subunit alpha type-5	PSMA5	6.53993e+07
Clathrin heavy chain 1	CLTC	45003000			Angiopoietin-related protein 7	ANGPTL7	6.53657e+07
Histone H2B type 2-E;Histone H2B type 1-B;Histone H2B type 1-O;Histone H2B type 1-J;Histone H2B type 3-B	HIST2H2BE;HIST1H2BB;HIST1H2BO;HIST1H2BJ;HIST3H2BB	4.47943e+07			Coatomer subunit epsilon	COPE	6.49763e+07
40S ribosomal protein S26;Putative 40S ribosomal protein S26-like 1	RPS26;RPS26P11	4.45143e+07			UDP-glucose 6-dehydrogenase	UGDH	6.46177e+07
40S ribosomal protein S30	FAU	44109000			14-3-3 protein gamma;14-3-3 protein gamma, N-terminally processed	YWHAG	64576000
Actin-related protein 3	ACTR3	4.35933e+07			40S ribosomal protein S21	RPS21	6.45387e+07
40S ribosomal protein S17	RPS17	4.35083e+07			Complement component 1 Q subcomponent-binding protein, mitochondrial	C1QBP	6.35273e+07
Dolichyl-diphosphooligosaccharide--protein glycosyltransferase 48 kDa subunit	DDOST	43417000			Adenylate kinase isoenzyme 1	AK1	6.34397e+07
Malate dehydrogenase, mitochondrial	MDH2	4.31243e+07			Lumican	LUM	6.33537e+07
Tubulin alpha-4A chain	TUBA4A	4.24683e+07			Stress-70 protein, mitochondrial	HSPA9	63244000
6-phosphogluconolactonase	PGLS	4.23237e+07			Prohibitin	PHB	63225000
60S ribosomal protein L3	RPL3	41957000			Histone H3.1;Histone H3.1t	HIST1H3A;HIST3H3	6.30517e+07
Ribosome-binding protein 1	RRBP1	4.18287e+07			Annexin A6	ANXA6	6.29937e+07
Heat shock protein HSP 90-alpha	HSP90AA1	41517000			60S ribosomal protein L3	RPL3	6.25177e+07
Fatty acid-binding protein, adipocyte	FABP4	4.11043e+07			Tumor protein D54	TPD52L2	6.23007e+07
Protein SEC13 homolog	SEC13	4.07547e+07			Histone H3.2	HIST2H3A	6.22007e+07
CD81 antigen	CD81	4.05163e+07			Metallothionein-1X	MT1X	62055000
Adenylyl cyclase-associated protein 1	CAP1	4.02477e+07			40S ribosomal protein S20	RPS20	6.16917e+07
SH3 domain-binding glutamic acid-rich-like protein	SH3BGRL	4.00663e+07			Collagen alpha-1(X) chain	COL10A1	61413000
Collagen alpha-2(XI) chain	COL11A2	4.00517e+07			D-3-phosphoglycerate dehydrogenase	PHGDH	6.10793e+07
40S ribosomal protein S16	RPS16	3.97777e+07			Coatomer subunit zeta-1	COPZ1	6.09933e+07
60S ribosomal protein L13	RPL13	3.96787e+07			Protein CutA	CUTA	5.94987e+07
Proteasome subunit beta type-6	PSMB6	3.96483e+07			60S ribosomal protein L13a;Putative 60S ribosomal protein L13a protein RPL13AP3	RPL13A;RPL13AP3	59333000
Peptidyl-prolyl cis-trans isomerase FKBP1A	FKBP1A	3.93927e+07			60S ribosomal protein L29	RPL29	5.90827e+07
Cartilage-associated protein	CRTAP	39372000			60S ribosomal protein L10a	RPL10A	58649000
60S ribosomal protein L17	RPL17	3.93643e+07			Prothymosin alpha;Prothymosin alpha, N-terminally processed;Thymosin alpha-1	PTMA	5.78417e+07
Coatomer subunit zeta-1	COPZ1	3.93343e+07			Ras GTPase-activating-like protein IQGAP1	IQGAP1	5.78107e+07
Lysyl oxidase homolog 2	LOXL2	3.92853e+07			Eukaryotic translation initiation factor 6	EIF6	56998000
60S ribosomal protein L10a	RPL10A	39167000			Filamin-A	FLNA	5.66523e+07
Transketolase	TKT	39014000			Platelet-activating factor acetylhydrolase IB subunit beta	PAFAH1B2	5.66387e+07
Perilipin-3	PLIN3	38958000			Ribosome-binding protein 1	RRBP1	56456000
1-phosphatidylinositol 4,5-bisphosphate phosphodiesterase delta-1	PLCD1	3.88817e+07			60S ribosomal protein L14	RPL14	5.63573e+07
Aminopeptidase N	ANPEP	3.85707e+07			WD repeat-containing protein 1	WDR1	5.59427e+07
Caldesmon	CALD1	3.84933e+07			Guanine nucleotide-binding protein G(I)/G(S)/G(T) subunit beta-1	GNB1	5.54753e+07
Myeloid-derived growth factor	MYDGF	3.84403e+07			40S ribosomal protein S9	RPS9	55298000
Connective tissue growth factor	CTGF	3.81387e+07			Quinone oxidoreductase	CRYZ	5.48583e+07
Heterogeneous nuclear ribonucleoprotein D0	HNRNPD	3.80487e+07			Poly(rC)-binding protein 1	PCBP1	5.48443e+07
40S ribosomal protein S6	RPS6	3.80273e+07			Adenylyl cyclase-associated protein 1	CAP1	5.47687e+07
MAPK-interacting and spindle-stabilizing protein-like	MAPK1IP1L	3.80097e+07			ATP-citrate synthase	ACLY	54403000
Histone H3.2	HIST2H3A	3.79482e+07			3-hydroxyacyl-CoA dehydrogenase type-2	HSD17B10	54320000
Urotensin-2	UTS2	3.77053e+07			Glycine--tRNA ligase	GARS	5.39463e+07
Tubulin beta-8 chain	TUBB8	3.76343e+07			40S ribosomal protein S13	RPS13	5.35593e+07
F-actin-capping protein subunit beta	CAPZB	3.73753e+07			Heterogeneous nuclear ribonucleoprotein K	HNRNPK	53379000
Parathymosin	PTMS	37234000			40S ribosomal protein S3	RPS3	53214000
Adenylate kinase isoenzyme 1	AK1	37221000			Histidine triad nucleotide-binding protein 1	HINT1	5.31803e+07
Phosphoglucomutase-1	PGM1	36612000			Catechol O-methyltransferase	COMT	5.27687e+07
60S ribosomal protein L5	RPL5	3.60577e+07			1-phosphatidylinositol 4,5-bisphosphate phosphodiesterase delta-1	PLCD1	5.27293e+07
Fascin	FSCN1	3.59807e+07			ATP synthase subunit delta, mitochondrial	ATP5D	5.23943e+07
Bone morphogenetic protein 2	BMP2	3.58993e+07			GTP-binding protein SAR1a	SAR1A	5.23383e+07
Septin-11	SEPT11	3.58107e+07			Dihydropyrimidinase-related protein 3	DPYSL3	5.22817e+07
F-box only protein 2	FBXO2	3.57433e+07			40S ribosomal protein S4, X isoform	RPS4X	52216000
Staphylococcal nuclease domain-containing protein 1	SND1	3.57197e+07			60S ribosomal protein L32	RPL32	5.21733e+07
Serine/arginine-rich splicing factor 3	SRSF3	3.55853e+07			Myeloid-derived growth factor	MYDGF	5.20027e+07
Alcohol dehydrogenase class-3	ADH5	3.54887e+07			Phosphoglucomutase-1	PGM1	51994000
Proteasome subunit alpha type-7	PSMA7	35482000			Ubiquitin-fold modifier 1	UFM1	5.17267e+07
40S ribosomal protein S18	RPS18	3.54593e+07			Chondroitin sulfate proteoglycan 4	CSPG4	5.14013e+07
Procollagen C-endopeptidase enhancer 1	PCOLCE	3.53633e+07			Collagen alpha-3(VI) chain	COL6A3	51386000
Vitamin K epoxide reductase complex subunit 1	VKORC1	3.53437e+07			Proteasome subunit alpha type-7	PSMA7	5.08017e+07
Eukaryotic translation initiation factor 6	EIF6	35209000			40S ribosomal protein S17	RPS17	5.07413e+07
60S ribosomal protein L38	RPL38	3.47797e+07			Alpha-actinin-1	ACTN1	50625000
40S ribosomal protein S9	RPS9	3.44313e+07			10 kDa heat shock protein, mitochondrial	HSPE1	4.99717e+07
Collagen alpha-1(XIV) chain	COL14A1	3.43897e+07			Translocon-associated protein subunit alpha	SSR1	4.99353e+07
Cysteine-rich protein 2	CRIP2	3.43253e+07			Urotensin-2	UTS2	4.98247e+07
Hsc70-interacting protein;Putative protein FAM10A4;Putative protein FAM10A5	ST13;ST13P4;ST13P5	34160000			Tubulin beta-8 chain	TUBB8	4.97447e+07
Nucleobindin-2;Nesfatin-1	NUCB2	33970000			Dolichyl-diphosphooligosaccharide--protein glycosyltransferase subunit 1	RPN1	4.96813e+07
Multiple coagulation factor deficiency protein 2	MCFD2	3.38757e+07			40S ribosomal protein S16	RPS16	49426000
Procollagen C-endopeptidase enhancer 2	PCOLCE2	33764000			60S ribosomal protein L10	RPL10	4.92517e+07
Platelet-activating factor acetylhydrolase IB subunit beta	PAFAH1B2	3.36797e+07			60S ribosomal protein L19	RPL19	4.91257e+07
Enhancer of rudimentary homolog	ERH	3.36667e+07			Protein phosphatase 1 regulatory subunit 14B	PPP1R14B	49054000
40S ribosomal protein S13	RPS13	3.35957e+07			Protein disulfide-isomerase A4	PDIA4	48510000
GTP-binding protein SAR1a	SAR1A	3.35807e+07			Annexin A4	ANXA4	4.83373e+07
Transforming protein RhoA;Rho-related GTP-binding protein RhoC	RHOA;RHOC	33333000			SH3 domain-binding glutamic acid-rich-like protein	SH3BGRL	48264000
Polymerase I and transcript release factor	PTRF	3.31497e+07			Ferritin light chain	FTL	4.82183e+07
Annexin A4	ANXA4	33120000			F-actin-capping protein subunit beta	CAPZB	47573000
Thy-1 membrane glycoprotein	THY1	32976000			Tubulin alpha-4A chain	TUBA4A	47075000
Actin-related protein 2	ACTR2	3.28913e+07			Dolichyl-diphosphooligosaccharide--protein glycosyltransferase 48 kDa subunit	DDOST	4.67303e+07
Calnexin	CANX	32806000			Nuclear transport factor 2	NUTF2	4.67177e+07
Ubiquitin-fold modifier 1	UFM1	32608000			Dynein light chain 1, cytoplasmic	DYNLL1	4.61223e+07
Transmembrane protein 263	TMEM263	3.23023e+07			Proteasome subunit beta type-3	PSMB3	46075000
Dolichyl-diphosphooligosaccharide--protein glycosyltransferase subunit 1	RPN1	3.22583e+07			ATP synthase subunit d, mitochondrial	ATP5H	45753000
60S ribosomal protein L23	RPL23	32190000			Collagen alpha-1(VI) chain	COL6A1	4.56077e+07
Heterogeneous nuclear ribonucleoprotein H;Heterogeneous nuclear ribonucleoprotein H, N-terminally processed	HNRNPH1	31987000			Calnexin	CANX	45562000
Heterogeneous nuclear ribonucleoprotein A1;Heterogeneous nuclear ribonucleoprotein A1, N-terminally processed;Heterogeneous nuclear ribonucleoprotein A1-like 2	HNRNPA1;HNRNPA1L2	31938000			Hsc70-interacting protein;Putative protein FAM10A4;Putative protein FAM10A5	ST13;ST13P4;ST13P5	45527000
Endoplasmic reticulum resident protein 44	ERP44	3.17023e+07			Actin-related protein 2/3 complex subunit 4	ARPC4	4.55137e+07
Dynein light chain 1, cytoplasmic	DYNLL1	3.14067e+07			Transketolase	TKT	4.54993e+07
Translocon-associated protein subunit alpha	SSR1	3.13913e+07			Plectin	PLEC	4.54063e+07
Sorcin	SRI	3.11527e+07			Staphylococcal nuclease domain-containing protein 1	SND1	4.53723e+07
Mesencephalic astrocyte-derived neurotrophic factor	MANF	3.11147e+07			Ubiquitin-conjugating enzyme E2 N	UBE2N	4.52717e+07
Collagen triple helix repeat-containing protein 1	CTHRC1	30635000			Fibroblast growth factor-binding protein 2	FGFBP2	45162000
Actin-related protein 2/3 complex subunit 4	ARPC4	30593000			60S ribosomal protein L24	RPL24	4.50033e+07
Adenosine kinase	ADK	30504000			Cartilage-associated protein	CRTAP	4.49877e+07
Small nuclear ribonucleoprotein Sm D1	SNRPD1	30496000			Transgelin-2	TAGLN2	44869000
Nucleoside diphosphate kinase A	NME1	3.04867e+07			60S ribosomal protein L35	RPL35	44621000
40S ribosomal protein S4, X isoform	RPS4X	3.04533e+07			Cytochrome b-c1 complex subunit 6, mitochondrial	UQCRH	4.45353e+07
40S ribosomal protein S5;40S ribosomal protein S5, N-terminally processed	RPS5	3.04493e+07			Collagen alpha-1(I) chain	COL1A1	4.42973e+07
S-phase kinase-associated protein 1	SKP1	30101000			Proteasome subunit alpha type-4	PSMA4	4.42077e+07
60S ribosomal protein L14	RPL14	2.97297e+07			Actin-related protein 2	ACTR2	4.35963e+07
Collagen alpha-2(I) chain	COL1A2	29580000			Aminopeptidase N	ANPEP	4.35823e+07
Heterogeneous nuclear ribonucleoproteins C1/C2;Heterogeneous nuclear ribonucleoprotein C-like 4;Heterogeneous nuclear ribonucleoprotein C-like 1;Heterogeneous nuclear ribonucleoprotein C-like 3;Heterogeneous nuclear ribonucleoprotein C-like 2	HNRNPC;HNRNPCL4;HNRNPCL1;HNRNPCL3;HNRNPCL2	2.95753e+07			60S ribosomal protein L21	RPL21	4.35793e+07
ADP-sugar pyrophosphatase	NUDT5	29553000			40S ribosomal protein S5;40S ribosomal protein S5, N-terminally processed	RPS5	4.33727e+07
Ubiquitin-like modifier-activating enzyme 1	UBA1	29428000			Endoplasmic reticulum resident protein 44	ERP44	43285000
S-formylglutathione hydrolase	ESD	2.92517e+07			40S ribosomal protein S3a	RPS3A	43232000
Tropomyosin alpha-3 chain	TPM3	2.90983e+07			CD59 glycoprotein	CD59	43030000
Peptidyl-prolyl cis-trans isomerase C	PPIC	29062000			Coatomer subunit gamma-1	COPG1	4.27373e+07
40S ribosomal protein S10	RPS10	2.89437e+07			60S ribosomal protein L15	RPL15	4.26633e+07
10 kDa heat shock protein, mitochondrial	HSPE1	2.87973e+07			NADH dehydrogenase [ubiquinone] 1 alpha subcomplex subunit 5	NDUFA5	42126400
Ubiquitin-conjugating enzyme E2 N	UBE2N	2.86973e+07			Voltage-dependent anion-selective channel protein 2	VDAC2	42112000
GTP-binding nuclear protein Ran	RAN	2.82053e+07			60S ribosomal protein L23	RPL23	4.18587e+07
Ran-specific GTPase-activating protein	RANBP1	27885000			Serine/threonine-protein phosphatase PP1-beta catalytic subunit	PPP1CB	4.14053e+07
Protein ERGIC-53	LMAN1	2.76077e+07			Heat shock 70 kDa protein 1B;Heat shock 70 kDa protein 1A	HSPA1B;HSPA1A	41142000
60S ribosomal protein L13a;Putative 60S ribosomal protein L13a protein RPL13AP3	RPL13A;RPL13AP3	27453000			ADP-sugar pyrophosphatase	NUDT5	4.10047e+07
F-actin-capping protein subunit alpha-2	CAPZA2	2.72717e+07			Coactosin-like protein	COTL1	40245000
Lactoylglutathione lyase	GLO1	27233000			60S ribosomal protein L18a	RPL18A	4.01967e+07
Inositol monophosphatase 1	IMPA1	27199000			Eukaryotic translation initiation factor 1	EIF1	3.94637e+07
40S ribosomal protein S15a	RPS15A	2.71607e+07			Cytochrome c oxidase subunit 5A, mitochondrial	COX5A	3.93163e+07
Glycogen phosphorylase, brain form	PYGB	27105000			Proteasome subunit beta type-1	PSMB1	3.92687e+07
Guanine nucleotide-binding protein G(I)/G(S)/G(T) subunit beta-1	GNB1	27087000			Fatty acid synthase;[Acyl-carrier-protein] S-acetyltransferase;[Acyl-carrier-protein] S-malonyltransferase;3-oxoacyl-[acyl-carrier-protein] synthase;3-oxoacyl-[acyl-carrier-protein] reductase;3-hydroxyacyl-[acyl-carrier-protein] dehydratase;Enoyl-[acyl-carrier-protein] reductase;Oleoyl-[acyl-carrier-protein] hydrolase	FASN	3.85893e+07
60S ribosomal protein L8	RPL8	2.70847e+07			Histone H1.2;Histone H1.4;Histone H1.3	HIST1H1C;HIST1H1E;HIST1H1D	3.82687e+07
WD repeat-containing protein 1	WDR1	27041000			Peptidyl-prolyl cis-trans isomerase FKBP11	FKBP11	3.81393e+07
ATP synthase subunit delta, mitochondrial	ATP5D	2.70367e+07			PDZ and LIM domain protein 4	PDLIM4	3.79507e+07
Glycine--tRNA ligase	GARS	2.70267e+07			Heterogeneous nuclear ribonucleoprotein D0	HNRNPD	3.79393e+07
Actin-related protein 2/3 complex subunit 2	ARPC2	26886000			UV excision repair protein RAD23 homolog B	RAD23B	37651000
Ras-related protein Rab-6A;Ras-related protein Rab-6B	RAB6A;RAB6B	2.68277e+07			Apolipoprotein D	APOD	3.75352e+07
Eukaryotic translation initiation factor 4H	EIF4H	2.67563e+07			40S ribosomal protein S10	RPS10	37441000
Calpain small subunit 1	CAPNS1	2.66943e+07			Barrier-to-autointegration factor;Barrier-to-autointegration factor, N-terminally processed	BANF1	3.71617e+07
Peptidyl-prolyl cis-trans isomerase FKBP9	FKBP9	26681000			Coatomer subunit zeta-2	COPZ2	3.71327e+07
40S ribosomal protein S2	RPS2	2.66093e+07			60S ribosomal protein L37a	RPL37A	3.70847e+07
Prostaglandin E synthase 3	PTGES3	2.65727e+07			GTP-binding nuclear protein Ran	RAN	3.69667e+07
Catechol O-methyltransferase	COMT	26525000			Serine/threonine-protein phosphatase 2A 65 kDa regulatory subunit A alpha isoform	PPP2R1A	3.69647e+07
Coatomer subunit gamma-1	COPG1	26518000			Proteasome subunit alpha type-2	PSMA2	3.69617e+07
Microtubule-associated protein 4	MAP4	26505000			Transmembrane emp24 domain-containing protein 10	TMED10	3.69173e+07
Fructose-bisphosphate aldolase C	ALDOC	26482000			Enhancer of rudimentary homolog	ERH	3.69157e+07
Ras-related protein Rab-1A	RAB1A	2.64497e+07			Proteasome subunit alpha type-3	PSMA3	3.68557e+07
Proteasome subunit alpha type-4	PSMA4	26344000			ADP/ATP translocase 3;ADP/ATP translocase 3, N-terminally processed	SLC25A6	3.68503e+07
Glutathione S-transferase omega-1	GSTO1	2.63367e+07			Lactoylglutathione lyase	GLO1	3.67563e+07
Poly(rC)-binding protein 2	PCBP2	2.62097e+07			T-complex protein 1 subunit zeta	CCT6A	3.66767e+07
CD59 glycoprotein	CD59	2.61693e+07			ATP synthase subunit gamma, mitochondrial	ATP5C1	3.65463e+07
Transmembrane emp24 domain-containing protein 7	TMED7	26152000			Adenosine kinase	ADK	3.64163e+07
CD109 antigen	CD109	2.60157e+07			Coatomer subunit beta	COPB2	36275000
T-complex protein 1 subunit beta	CCT2	2.59747e+07			Vitamin K epoxide reductase complex subunit 1	VKORC1	3.62677e+07
Copper transport protein ATOX1	ATOX1	2.58707e+07			Transmembrane emp24 domain-containing protein 7	TMED7	3.61293e+07
Cathepsin B;Cathepsin B light chain;Cathepsin B heavy chain	CTSB	2.58567e+07			Collagen alpha-2(I) chain	COL1A2	36102000
Proteasome subunit beta type-3	PSMB3	25838000			Enoyl-CoA hydratase, mitochondrial	ECHS1	36070000
Ras-related protein Rab-2A	RAB2A	2.58363e+07			60S ribosomal protein L38	RPL38	36049000
Peptidyl-prolyl cis-trans isomerase FKBP11	FKBP11	2.58127e+07			Transmembrane protein 263	TMEM263	35931000
Eukaryotic translation initiation factor 1	EIF1	25761000			Cathepsin B;Cathepsin B light chain;Cathepsin B heavy chain	CTSB	3.59087e+07
EF-hand domain-containing protein D1	EFHD1	25758000			Ran-specific GTPase-activating protein	RANBP1	3.58743e+07
60S ribosomal protein L21	RPL21	2.57277e+07			Heterogeneous nuclear ribonucleoprotein H;Heterogeneous nuclear ribonucleoprotein H, N-terminally processed	HNRNPH1	35815000
Proteasome subunit alpha type-2	PSMA2	2.54123e+07			Ras-related protein Rab-7a	RAB7A	3.57473e+07
UV excision repair protein RAD23 homolog B	RAD23B	25401000			Ubiquitin-conjugating enzyme E2 D2;Ubiquitin-conjugating enzyme E2 D3	UBE2D2;UBE2D3	3.57363e+07
Vinculin	VCL	2.51463e+07			Peptidyl-prolyl cis-trans isomerase FKBP9	FKBP9	3.57177e+07
Proteasome subunit alpha type-3	PSMA3	2.51307e+07			Actin-related protein 2/3 complex subunit 2	ARPC2	3.56627e+07
Protein TFG	TFG	2.50603e+07			Heterogeneous nuclear ribonucleoproteins A2/B1	HNRNPA2B1	3.56533e+07
Procollagen-lysine,2-oxoglutarate 5-dioxygenase 2	PLOD2	25004000			Electron transfer flavoprotein subunit beta	ETFB	3.55213e+07
Heat shock 70 kDa protein 1B;Heat shock 70 kDa protein 1A	HSPA1B;HSPA1A	2.49703e+07			Prostaglandin E synthase 3	PTGES3	3.54163e+07
Talin-1	TLN1	24854000			T-complex protein 1 subunit gamma	CCT3	3.53863e+07
High mobility group protein B1;Putative high mobility group protein B1-like 1	HMGB1;HMGB1P1	2.48393e+07			Poly(rC)-binding protein 2	PCBP2	35350000
Protein CutA	CUTA	2.47873e+07			40S ribosomal protein S24	RPS24	3.52243e+07
Scrapie-responsive protein 1	SCRG1	24749000			Coatomer subunit beta	COPB1	35131000
Protein NOXP20	FAM114A1	2.47137e+07			BolA-like protein 2	BOLA2	3.49097e+07
Lumican	LUM	24492000			Ubiquitin-like modifier-activating enzyme 1	UBA1	3.48627e+07
14-3-3 protein eta	YWHAH	2.44427e+07			Proteasome subunit alpha type-6	PSMA6	3.47837e+07
Collagen alpha-1(XI) chain	COL11A1	2.44263e+07			Protein ERGIC-53	LMAN1	3.46643e+07
40S ribosomal protein S11	RPS11	2.42753e+07			Thioredoxin domain-containing protein 17	TXNDC17	34483000
Ras GTPase-activating-like protein IQGAP1	IQGAP1	2.42267e+07			Serine/arginine-rich splicing factor 3	SRSF3	3.43743e+07
Protein phosphatase 1 regulatory subunit 14B	PPP1R14B	24198000			Basement membrane-specific heparan sulfate proteoglycan core protein;Endorepellin;LG3 peptide	HSPG2	3.43477e+07
Transmembrane emp24 domain-containing protein 10	TMED10	2.39767e+07			Calpain small subunit 1	CAPNS1	3.43227e+07
Serine/threonine-protein phosphatase 2A 65 kDa regulatory subunit A alpha isoform	PPP2R1A	2.39367e+07			Ras-related protein Rab-6A;Ras-related protein Rab-6B	RAB6A;RAB6B	3.40147e+07
Prohibitin	PHB	2.37757e+07			Surfeit locus protein 4	SURF4	3.38967e+07
40S ribosomal protein S3a	RPS3A	2.37473e+07			MAPK-interacting and spindle-stabilizing protein-like	MAPK1IP1L	3.37753e+07
T-complex protein 1 subunit zeta	CCT6A	2.36003e+07			Protein TFG	TFG	33677000
Coatomer subunit zeta-2	COPZ2	2.35987e+07			Microtubule-associated protein 4	MAP4	3.36647e+07
Protein PRRC1	PRRC1	2.35317e+07			40S ribosomal protein S23	RPS23	33649000
Ubiquitin-conjugating enzyme E2 L3	UBE2L3	2.35153e+07			Heat shock protein beta-6	HSPB6	3.35933e+07
60S ribosomal protein L32	RPL32	2.33967e+07			Fascin	FSCN1	33516000
Ezrin	EZR	23347000			Thioredoxin-dependent peroxide reductase, mitochondrial	PRDX3	33469000
Serine/threonine-protein phosphatase PP1-beta catalytic subunit	PPP1CB	2.33363e+07			Protein PRRC1	PRRC1	3.34323e+07
Stathmin	STMN1	2.32333e+07			40S ribosomal protein S11	RPS11	3.33953e+07
Coatomer subunit beta	COPB1	2.31973e+07			Heterogeneous nuclear ribonucleoproteins C1/C2;Heterogeneous nuclear ribonucleoprotein C-like 4;Heterogeneous nuclear ribonucleoprotein C-like 1;Heterogeneous nuclear ribonucleoprotein C-like 3;Heterogeneous nuclear ribonucleoprotein C-like 2	HNRNPC;HNRNPCL4;HNRNPCL1;HNRNPCL3;HNRNPCL2	3.33373e+07
60S ribosomal protein L10	RPL10	23185000			T-complex protein 1 subunit beta	CCT2	3.33003e+07
Collagen alpha-2(VI) chain	COL6A2	2.31597e+07			SPARC-related modular calcium-binding protein 2	SMOC2	33230800
Barrier-to-autointegration factor;Barrier-to-autointegration factor, N-terminally processed	BANF1	2.31133e+07			Sorcin	SRI	3.31577e+07
Prosaposin;Saposin-A;Saposin-B-Val;Saposin-B;Saposin-C;Saposin-D	PSAP	22934000			F-actin-capping protein subunit alpha-2	CAPZA2	3.31463e+07
T-complex protein 1 subunit gamma	CCT3	2.25833e+07			Costars family protein ABRACL	ABRACL	3.29438e+07
Thioredoxin-dependent peroxide reductase, mitochondrial	PRDX3	2.25713e+07			Tubulin alpha-1C chain	TUBA1C	32913000
Multifunctional protein ADE2;Phosphoribosylaminoimidazole-succinocarboxamide synthase;Phosphoribosylaminoimidazole carboxylase	PAICS	2.24943e+07			Ubiquitin carboxyl-terminal hydrolase isozyme L1	UCHL1	32845000
Spliceosome RNA helicase DDX39B;ATP-dependent RNA helicase DDX39A	DDX39B;DDX39A	22466000			Cytosolic non-specific dipeptidase	CNDP2	3.27267e+07
Heterogeneous nuclear ribonucleoprotein U	HNRNPU	2.24547e+07			Adenosylhomocysteinase	AHCY	3.26843e+07
La-related protein 1	LARP1	22440300			40S ribosomal protein S15a	RPS15A	3.26453e+07
Ras-related protein Rab-7a	RAB7A	2.22577e+07			Inositol monophosphatase 1	IMPA1	32617000
ATP-citrate synthase	ACLY	22211000			Coagulation factor XIII A chain	F13A1	32579000
Peptidyl-prolyl cis-trans isomerase FKBP5;Peptidyl-prolyl cis-trans isomerase FKBP5, N-terminally processed	FKBP5	22205000			Arylsulfatase A;Arylsulfatase A component B;Arylsulfatase A component C	ARSA	32456000
40S ribosomal protein S19	RPS19	2.20743e+07			Nucleobindin-2;Nesfatin-1	NUCB2	3.23033e+07
Carbonyl reductase [NADPH] 1	CBR1	22061000			Serine protease HTRA1	HTRA1	3.22837e+07
Proteasome subunit alpha type-6	PSMA6	2.18713e+07			Prefoldin subunit 4	PFDN4	3.22603e+07
Procollagen-lysine,2-oxoglutarate 5-dioxygenase 3	PLOD3	2.18017e+07			40S ribosomal protein S2	RPS2	3.22417e+07
Versican core protein	VCAN	21772000			Ubiquitin-conjugating enzyme E2 L3	UBE2L3	3.21467e+07
45 kDa calcium-binding protein	SDF4	2.16433e+07			Ras-related protein Rab-1A	RAB1A	32091000
Coactosin-like protein	COTL1	21639000			Delta-1-pyrroline-5-carboxylate synthase;Glutamate 5-kinase;Gamma-glutamyl phosphate reductase	ALDH18A1	3.20503e+07
Stress-70 protein, mitochondrial	HSPA9	2.15463e+07			Pyrroline-5-carboxylate reductase 1, mitochondrial	PYCR1	3.16903e+07
Heterogeneous nuclear ribonucleoprotein Q	SYNCRIP	2.14857e+07			Phosphoethanolamine/phosphocholine phosphatase	PHOSPHO1	31614000
60S ribosomal protein L29	RPL29	2.14603e+07			Aspartate aminotransferase, cytoplasmic	GOT1	31446000
Nucleosome assembly protein 1-like 1	NAP1L1	21454000			60S ribosomal protein L26;60S ribosomal protein L26-like 1	RPL26;RPL26L1	3.13607e+07
Glutamine--fructose-6-phosphate aminotransferase [isomerizing] 1	GFPT1	2.14247e+07			Coiled-coil domain-containing protein 80	CCDC80	31290000
Quinone oxidoreductase	CRYZ	21213000			14-3-3 protein eta	YWHAH	3.11437e+07
Tryptophan--tRNA ligase, cytoplasmic;T1-TrpRS;T2-TrpRS	WARS	2.10303e+07			Sushi repeat-containing protein SRPX2	SRPX2	31129000
Coatomer subunit beta	COPB2	2.10297e+07			Proteasome subunit beta type-5	PSMB5	3.11283e+07
T-complex protein 1 subunit theta	CCT8	2.09753e+07			Ras-related protein Rap-1A	RAP1A	3.08867e+07
Glutathione peroxidase 7	GPX7	20861000			Eukaryotic translation initiation factor 4H	EIF4H	3.08037e+07
Carbonic anhydrase 2	CA2	20673800			Peptidyl-prolyl cis-trans isomerase C	PPIC	30696000
ADP-ribosylation factor-like protein 3	ARL3	20669000			Small nuclear ribonucleoprotein Sm D1	SNRPD1	3.06737e+07
Proteasome subunit beta type-1	PSMB1	2.05417e+07			CD9 antigen	CD9	3.06364e+07
60S ribosomal protein L18	RPL18	20476600			Serine--tRNA ligase, cytoplasmic	SARS	3.06357e+07
Thioredoxin domain-containing protein 12	TXNDC12	2.03453e+07			T-complex protein 1 subunit theta	CCT8	3.04977e+07
Ornithine aminotransferase, mitochondrial;Ornithine aminotransferase, hepatic form;Ornithine aminotransferase, renal form	OAT	2.03327e+07			Coatomer subunit delta	ARCN1	3.04023e+07
Histone H1.2;Histone H1.4;Histone H1.3	HIST1H1C;HIST1H1E;HIST1H1D	20072000			Heterogeneous nuclear ribonucleoprotein Q	SYNCRIP	3.02603e+07
40S ribosomal protein S24	RPS24	1.99103e+07			S-formylglutathione hydrolase	ESD	3.00897e+07
60S ribosomal protein L15	RPL15	1.98954e+07			Collagen alpha-2(XI) chain	COL11A2	3.00757e+07
Myristoylated alanine-rich C-kinase substrate	MARCKS	19876000			Alpha/beta hydrolase domain-containing protein 14B	ABHD14B	2.99777e+07
Surfeit locus protein 4	SURF4	19812000			Protein NOXP20	FAM114A1	2.99557e+07
Actin-related protein 2/3 complex subunit 1B	ARPC1B	1.97583e+07			Eukaryotic translation initiation factor 2 subunit 1	EIF2S1	2.99533e+07
Transmembrane emp24 domain-containing protein 9	TMED9	1.97453e+07			Ubiquitin carboxyl-terminal hydrolase isozyme L3	UCHL3	29658000
Serine protease HTRA1	HTRA1	1.96715e+07			Alcohol dehydrogenase class-3	ADH5	2.95557e+07
Transcription factor BTF3 homolog 4	BTF3L4	1.96697e+07			Ferritin heavy chain;Ferritin heavy chain, N-terminally processed	FTH1	2.94947e+07
3-hydroxyacyl-CoA dehydrogenase type-2	HSD17B10	1.96383e+07			Glutathione S-transferase omega-1	GSTO1	2.93893e+07
T-complex protein 1 subunit delta	CCT4	1.96053e+07			T-complex protein 1 subunit alpha	TCP1	2.92597e+07
Proteasome subunit beta type-5	PSMB5	19600000			Electron transfer flavoprotein subunit alpha, mitochondrial	ETFA	2.89833e+07
Dihydropyrimidinase-related protein 3	DPYSL3	19573000			Protein transport protein Sec31A	SEC31A	2.88483e+07
Alcohol dehydrogenase [NADP(+)]	AKR1A1	19562000			Heterogeneous nuclear ribonucleoprotein A1;Heterogeneous nuclear ribonucleoprotein A1, N-terminally processed;Heterogeneous nuclear ribonucleoprotein A1-like 2	HNRNPA1;HNRNPA1L2	2.88067e+07
Ras-related protein Rap-1A	RAP1A	1.95457e+07			Proteasome subunit alpha type-1	PSMA1	2.86293e+07
14 kDa phosphohistidine phosphatase	PHPT1	19503000			Actin-related protein 2/3 complex subunit 5	ARPC5	28629000
Ubiquitin-conjugating enzyme E2 D2;Ubiquitin-conjugating enzyme E2 D3	UBE2D2;UBE2D3	1.94482e+07			T-complex protein 1 subunit delta	CCT4	2.85183e+07
Serine/arginine-rich splicing factor 1	SRSF1	1.92843e+07			Nucleolin	NCL	2.85137e+07
Transcription elongation factor B polypeptide 1	TCEB1	1.92137e+07			Purine nucleoside phosphorylase	PNP	2.8445e+07
Polypyrimidine tract-binding protein 1	PTBP1	1.91683e+07			Ornithine aminotransferase, mitochondrial;Ornithine aminotransferase, hepatic form;Ornithine aminotransferase, renal form	OAT	2.84323e+07
Sideroflexin-1	SFXN1	1.90003e+07			45 kDa calcium-binding protein	SDF4	28007000
40S ribosomal protein S23	RPS23	18996000			Heat shock 70 kDa protein 6;Putative heat shock 70 kDa protein 7	HSPA6;HSPA7	2.79727e+07
EGF-containing fibulin-like extracellular matrix protein 2	EFEMP2	18935000			Transmembrane emp24 domain-containing protein 9	TMED9	2.79647e+07
Clusterin;Clusterin beta chain;Clusterin alpha chain	CLU	1.89337e+07			Glucose-6-phosphate isomerase	GPI	2.79294e+07
Glycogen phosphorylase, liver form	PYGL	1.89303e+07			Transcription elongation factor B polypeptide 1	TCEB1	2.78027e+07
Actin-related protein 2/3 complex subunit 5	ARPC5	1.87717e+07			Proteasome subunit beta type-4	PSMB4	27785000
PRA1 family protein 3	ARL6IP5	18741000			ATP synthase-coupling factor 6, mitochondrial	ATP5J	2.76867e+07
Sialic acid synthase	NANS	1.87253e+07			Hypoxia up-regulated protein 1	HYOU1	2.76007e+07
Programmed cell death protein 6	PDCD6	1.86627e+07			PRA1 family protein 3	ARL6IP5	2.75943e+07
60S ribosomal protein L35	RPL35	1.86424e+07			Ras-related protein Rab-2A	RAB2A	27389000
Eukaryotic translation initiation factor 2 subunit 1	EIF2S1	18637000			Isocitrate dehydrogenase [NADP] cytoplasmic	IDH1	27386000
Hypoxia up-regulated protein 1	HYOU1	18487000			Multifunctional protein ADE2;Phosphoribosylaminoimidazole-succinocarboxamide synthase;Phosphoribosylaminoimidazole carboxylase	PAICS	27323000
Dolichyl-diphosphooligosaccharide--protein glycosyltransferase subunit DAD1	DAD1	1.84327e+07			Programmed cell death protein 6	PDCD6	2.72003e+07
LIM and SH3 domain protein 1	LASP1	1.84077e+07			Translin	TSN	2.70863e+07
Nucleolin	NCL	1.83257e+07			Proteasome subunit beta type-2	PSMB2	2.70703e+07
Neuroblast differentiation-associated protein AHNAK	AHNAK	1.82727e+07			Basigin	BSG	27053000
Thioredoxin domain-containing protein 17	TXNDC17	1.82133e+07			ADP-ribosylation factor-like protein 3	ARL3	26958000
Coiled-coil domain-containing protein 80	CCDC80	1.81797e+07			26S proteasome non-ATPase regulatory subunit 4	PSMD4	2.68143e+07
Lupus La protein	SSB	18168000			Hsp90 co-chaperone Cdc37;Hsp90 co-chaperone Cdc37, N-terminally processed	CDC37	2.67577e+07
Pyrroline-5-carboxylate reductase 1, mitochondrial	PYCR1	18154000			Guanine nucleotide-binding protein G(i) subunit alpha-2	GNAI2	2.67557e+07
Eukaryotic translation initiation factor 2 subunit 3;Putative eukaryotic translation initiation factor 2 subunit 3-like protein	EIF2S3;EIF2S3L	1.81053e+07			Eukaryotic translation initiation factor 2 subunit 3;Putative eukaryotic translation initiation factor 2 subunit 3-like protein	EIF2S3;EIF2S3L	2.67477e+07
Serine--tRNA ligase, cytoplasmic	SARS	1.80687e+07			Bifunctional 3-phosphoadenosine 5-phosphosulfate synthase 1;Sulfate adenylyltransferase;Adenylyl-sulfate kinase	PAPSS1	2.66035e+07
T-complex protein 1 subunit alpha	TCP1	18045000			LIM and SH3 domain protein 1	LASP1	2.65413e+07
60S ribosomal protein L19	RPL19	1.80325e+07			COP9 signalosome complex subunit 8	COPS8	26509000
X-ray repair cross-complementing protein 5	XRCC5	1.80253e+07			Septin-11	SEPT11	2.65067e+07
		1.79527e+07			Alcohol dehydrogenase [NADP(+)]	AKR1A1	2.63213e+07
Astrocytic phosphoprotein PEA-15	PEA15	17952000			Transcription elongation factor B polypeptide 2	TCEB2	2.62287e+07
Tubulin beta-6 chain	TUBB6	1.79433e+07			S-phase kinase-associated protein 1	SKP1	2.62037e+07
Adenosylhomocysteinase	AHCY	1.78893e+07			Transcription factor BTF3 homolog 4	BTF3L4	26054000
Histidine triad nucleotide-binding protein 1	HINT1	17883000			Phosphoacetylglucosamine mutase	PGM3	25937000
Fatty acid synthase;[Acyl-carrier-protein] S-acetyltransferase;[Acyl-carrier-protein] S-malonyltransferase;3-oxoacyl-[acyl-carrier-protein] synthase;3-oxoacyl-[acyl-carrier-protein] reductase;3-hydroxyacyl-[acyl-carrier-protein] dehydratase;Enoyl-[acyl-carrier-protein] reductase;Oleoyl-[acyl-carrier-protein] hydrolase	FASN	1.78643e+07			ADP-ribosylation factor-like protein 1	ARL1	25895800
Guanine nucleotide-binding protein G(i) subunit alpha-2	GNAI2	1.78173e+07			Alpha-soluble NSF attachment protein	NAPA	2.58837e+07
Basigin	BSG	1.77417e+07			Glutamine--fructose-6-phosphate aminotransferase [isomerizing] 1	GFPT1	2.58387e+07
Serine/threonine-protein phosphatase 2A catalytic subunit beta isoform	PPP2CB	1.76003e+07			Bifunctional glutamate/proline--tRNA ligase;Glutamate--tRNA ligase;Proline--tRNA ligase	EPRS	25755000
Nucleosome assembly protein 1-like 4	NAP1L4	1.75877e+07			Collagen alpha-1(XI) chain	COL11A1	25640000
Cytochrome c oxidase subunit 5A, mitochondrial	COX5A	17556300			Importin subunit beta-1	KPNB1	25497000
Transcription elongation factor B polypeptide 2	TCEB2	1.75385e+07			Golgi resident protein GCP60	ACBD3	2.53857e+07
Bifunctional 3-phosphoadenosine 5-phosphosulfate synthase 1;Sulfate adenylyltransferase;Adenylyl-sulfate kinase	PAPSS1	17476000			Tropomyosin alpha-3 chain	TPM3	2.53447e+07
Glucose-6-phosphate isomerase	GPI	17445000			Lysosomal Pro-X carboxypeptidase	PRCP	25316000
60S ribosomal protein L24	RPL24	1.74052e+07			Sialic acid synthase	NANS	25265000
Septin-7	SEPT7	17382000			Prohibitin-2	PHB2	2.52213e+07
Retinol-binding protein 4;Plasma retinol-binding protein(1-182);Plasma retinol-binding protein(1-181);Plasma retinol-binding protein(1-179);Plasma retinol-binding protein(1-176)	RBP4	17315100			Vigilin	HDLBP	25217000
Voltage-dependent anion-selective channel protein 2	VDAC2	1.73103e+07			Peptidyl-prolyl cis-trans isomerase FKBP5;Peptidyl-prolyl cis-trans isomerase FKBP5, N-terminally processed	FKBP5	25195000
Golgi resident protein GCP60	ACBD3	1.72883e+07			STE20/SPS1-related proline-alanine-rich protein kinase	STK39	2.51853e+07
Interleukin enhancer-binding factor 2	ILF2	1.72617e+07			V-type proton ATPase subunit G 1	ATP6V1G1	2.50461e+07
STE20/SPS1-related proline-alanine-rich protein kinase	STK39	1.72487e+07			Serotransferrin	TF	24931000
UPF0568 protein C14orf166	C14orf166	17244000			Talin-1	TLN1	2.48983e+07
Peptidyl-prolyl cis-trans isomerase FKBP7	FKBP7	1.72393e+07			General vesicular transport factor p115	USO1	24887000
Glutaredoxin-1	GLRX	17237000			40S ribosomal protein S19	RPS19	2.48633e+07
60S ribosomal protein L37a	RPL37A	17150000			UPF0568 protein C14orf166	C14orf166	2.48407e+07
T-complex protein 1 subunit epsilon	CCT5	17054000			COP9 signalosome complex subunit 6	COPS6	2.48237e+07
Proteasome subunit beta type-4	PSMB4	17029000			Spliceosome RNA helicase DDX39B;ATP-dependent RNA helicase DDX39A	DDX39B;DDX39A	24764000
Proteasome subunit alpha type-1	PSMA1	1.70203e+07			X-ray repair cross-complementing protein 5	XRCC5	2.47117e+07
Vigilin	HDLBP	1.69873e+07			ATP synthase subunit O, mitochondrial	ATP5O	2.46303e+07
Heat shock 70 kDa protein 6;Putative heat shock 70 kDa protein 7	HSPA6;HSPA7	1.69262e+07			Coatomer subunit alpha;Xenin;Proxenin	COPA	24552000
60S ribosomal protein L11	RPL11	1.69213e+07			Mesencephalic astrocyte-derived neurotrophic factor	MANF	2.44831e+07
60S ribosomal protein L6	RPL6	16914900			Golgi reassembly-stacking protein 2	GORASP2	24426000
PDZ and LIM domain protein 4	PDLIM4	16908000			AP-2 complex subunit beta	AP2B1	24407000
Small nuclear ribonucleoprotein Sm D3	SNRPD3	1.69067e+07			T-complex protein 1 subunit epsilon	CCT5	24181000
Hsp90 co-chaperone Cdc37;Hsp90 co-chaperone Cdc37, N-terminally processed	CDC37	1.68007e+07			Serine/threonine-protein phosphatase 2A catalytic subunit beta isoform	PPP2CB	2.40667e+07
Arylsulfatase A;Arylsulfatase A component B;Arylsulfatase A component C	ARSA	1.67064e+07			Peptidyl-prolyl cis-trans isomerase FKBP7	FKBP7	24053500
CD166 antigen	ALCAM	1.66683e+07			Major vault protein	MVP	24050000
Spectrin alpha chain, non-erythrocytic 1	SPTAN1	1.66547e+07			Cysteine-rich protein 2	CRIP2	2.40207e+07
Programmed cell death 6-interacting protein	PDCD6IP	1.65323e+07			D-dopachrome decarboxylase;D-dopachrome decarboxylase-like protein	DDT;DDTL	2.40003e+07
Procollagen-lysine,2-oxoglutarate 5-dioxygenase 1	PLOD1	16530000			Nucleobindin-1	NUCB1	2.38463e+07
NADH dehydrogenase [ubiquinone] 1 alpha subcomplex subunit 5	NDUFA5	1.65163e+07			26S proteasome non-ATPase regulatory subunit 11	PSMD11	2.37997e+07
Small ubiquitin-related modifier 4;Small ubiquitin-related modifier 2;Small ubiquitin-related modifier 3	SUMO4;SUMO2;SUMO3	1.64947e+07			Single-stranded DNA-binding protein, mitochondrial	SSBP1	2.35783e+07
Calponin-3	CNN3	1.64787e+07			Dynein light chain Tctex-type 3	DYNLT3	2.33607e+07
Collagen alpha-1(I) chain	COL1A1	1.64713e+07			Nucleosome assembly protein 1-like 1	NAP1L1	2.32633e+07
Small nuclear ribonucleoprotein Sm D2	SNRPD2	16441000			Glycogen phosphorylase, liver form	PYGL	23197000
ATP synthase subunit gamma, mitochondrial	ATP5C1	16417000			Fermitin family homolog 2	FERMT2	2.31923e+07
Inosine-5-monophosphate dehydrogenase 2	IMPDH2	1.63912e+07			Keratin, type I cytoskeletal 10	KRT10	2.31599e+07
60S ribosomal protein L26;60S ribosomal protein L26-like 1	RPL26;RPL26L1	1.63813e+07			Keratin, type I cytoskeletal 9	KRT9	2.31457e+07
Translin	TSN	1.63267e+07			Vesicle-trafficking protein SEC22b	SEC22B	2.30903e+07
Serotransferrin	TF	1.63003e+07			Four and a half LIM domains protein 1	FHL1	2.29687e+07
AP-2 complex subunit beta	AP2B1	16233000			Carbonyl reductase [NADPH] 1	CBR1	22941000
Septin-2	SEPT2	16177000			26S protease regulatory subunit 6B	PSMC4	2.28607e+07
Major vault protein	MVP	1.61363e+07			60S ribosomal protein L11	RPL11	2.28517e+07
Small nuclear ribonucleoprotein G;Putative small nuclear ribonucleoprotein G-like protein 15	SNRPG;SNRPGP15	1.61217e+07			Cell division control protein 42 homolog	CDC42	2.28383e+07
Protein transport protein Sec61 subunit gamma	SEC61G	1.59837e+07			Stomatin-like protein 2, mitochondrial	STOML2	22768000
Protein-L-isoaspartate(D-aspartate) O-methyltransferase	PCMT1	1.59337e+07			Calcineurin subunit B type 1	PPP3R1	2.27497e+07
General vesicular transport factor p115	USO1	1.59333e+07			Elongation factor Tu, mitochondrial	TUFM	2.27137e+07
Isocitrate dehydrogenase [NADP] cytoplasmic	IDH1	15912000			Cytochrome c	CYCS	2.26487e+07
Rab GDP dissociation inhibitor alpha	GDI1	1.58797e+07			Protein transport protein Sec23A	SEC23A	2.25973e+07
Coatomer subunit delta	ARCN1	1.58613e+07			Pyridoxal kinase	PDXK	2.25113e+07
Actin-related protein 2/3 complex subunit 3	ARPC3	15732000			Vinculin	VCL	2.24177e+07
ERO1-like protein alpha	ERO1L	1.56974e+07			Guanine nucleotide-binding protein G(I)/G(S)/G(T) subunit beta-2	GNB2	22349000
Phosphoacetylglucosamine mutase	PGM3	1.56523e+07			Caldesmon	CALD1	2.22707e+07
Activated RNA polymerase II transcriptional coactivator p15	SUB1	15616600			Histone H2B type 2-E;Histone H2B type 1-B;Histone H2B type 1-O;Histone H2B type 1-J;Histone H2B type 3-B	HIST2H2BE;HIST1H2BB;HIST1H2BO;HIST1H2BJ;HIST3H2BB	2.21683e+07
Proteasome subunit beta type-2	PSMB2	1.55863e+07			tRNA-splicing ligase RtcB homolog	RTCB	2.19163e+07
Protein transport protein Sec31A	SEC31A	1.55123e+07			Tyrosine--tRNA ligase, cytoplasmic;Tyrosine--tRNA ligase, cytoplasmic, N-terminally processed	YARS	21860000
tRNA-splicing ligase RtcB homolog	RTCB	1.54877e+07			Actin-related protein 2/3 complex subunit 1B	ARPC1B	2.18597e+07
Superoxide dismutase [Mn], mitochondrial	SOD2	1.54847e+07			Protein kinase C and casein kinase substrate in neurons protein 2	PACSIN2	2.18053e+07
Guanine nucleotide-binding protein G(I)/G(S)/G(T) subunit beta-2	GNB2	1.53707e+07			Heterogeneous nuclear ribonucleoprotein U	HNRNPU	2.18003e+07
Membrane-associated progesterone receptor component 2	PGRMC2	1.53427e+07			Activated RNA polymerase II transcriptional coactivator p15	SUB1	2.17573e+07
Insulin-like growth factor-binding protein 7	IGFBP7	1.52937e+07			U6 snRNA-associated Sm-like protein LSm2	LSM2	2.15943e+07
Osteomodulin	OMD	1.52722e+07			Glutaredoxin-1	GLRX	21561100
26S proteasome non-ATPase regulatory subunit 4	PSMD4	1.52449e+07			Interleukin enhancer-binding factor 2	ILF2	21506000
Neudesin	NENF	15132000			Serine-threonine kinase receptor-associated protein	STRAP	2.13723e+07
Costars family protein ABRACL	ABRACL	1.51313e+07			Polymerase I and transcript release factor	PTRF	21366200
Procollagen galactosyltransferase 1	COLGALT1	15125000			Aspartate--tRNA ligase, cytoplasmic	DARS	21220000
Golgi reassembly-stacking protein 2	GORASP2	1.49587e+07			Serine/arginine-rich splicing factor 1	SRSF1	2.11363e+07
Aspartate--tRNA ligase, cytoplasmic	DARS	14953300			Protein transport protein Sec61 subunit gamma	SEC61G	2.10949e+07
Profilin-2	PFN2	1.49345e+07			Beta-galactosidase	GLB1	2.10303e+07
Heterogeneous nuclear ribonucleoprotein L	HNRNPL	1.49343e+07			Proteasome subunit beta type-7	PSMB7	2.10017e+07
Tubulin alpha-1C chain	TUBA1C	14921000			ATP synthase subunit g, mitochondrial	ATP5L	20950000
Tropomyosin alpha-1 chain	TPM1	1.48613e+07			Ubiquitin-conjugating enzyme E2 K	UBE2K	2.08483e+07
BolA-like protein 2	BOLA2	14847800			Procollagen-lysine,2-oxoglutarate 5-dioxygenase 3	PLOD3	20798000
ATP synthase-coupling factor 6, mitochondrial	ATP5J	1.48023e+07			Asparagine--tRNA ligase, cytoplasmic	NARS	20666000
Protein transport protein Sec23A	SEC23A	1.47503e+07			Keratin, type II cytoskeletal 1	KRT1	20662540
Vesicle-trafficking protein SEC22b	SEC22B	1.4702e+07			Ras-related C3 botulinum toxin substrate 1;Ras-related C3 botulinum toxin substrate 3;Ras-related C3 botulinum toxin substrate 2	RAC1;RAC3;RAC2	2.05897e+07
4F2 cell-surface antigen heavy chain	SLC3A2	1.4676e+07			40S ribosomal protein S29	RPS29	2.05653e+07
Lysosomal alpha-glucosidase;76 kDa lysosomal alpha-glucosidase;70 kDa lysosomal alpha-glucosidase	GAA	14655000			Glyoxylate reductase/hydroxypyruvate reductase	GRHPR	2.0557e+07
Importin subunit beta-1	KPNB1	1.46163e+07			Oligosaccharyltransferase complex subunit OSTC	OSTC	2.05017e+07
D-dopachrome decarboxylase;D-dopachrome decarboxylase-like protein	DDT;DDTL	1.46083e+07			Ribose-phosphate pyrophosphokinase 1	PRPS1	2.04753e+07
Ubiquitin-conjugating enzyme E2 K	UBE2K	1.44583e+07			Heat shock 70 kDa protein 4	HSPA4	2.04267e+07
Electron transfer flavoprotein subunit alpha, mitochondrial	ETFA	14422000			Inosine-5-monophosphate dehydrogenase 2	IMPDH2	20404000
ATP synthase subunit d, mitochondrial	ATP5H	14338000			Profilin-2	PFN2	2.03467e+07
Deoxynucleoside triphosphate triphosphohydrolase SAMHD1	SAMHD1	14326600			Deoxynucleoside triphosphate triphosphohydrolase SAMHD1	SAMHD1	2.03107e+07
Ras suppressor protein 1	RSU1	1.42813e+07			Eukaryotic translation initiation factor 3 subunit K	EIF3K	2.03083e+07
Src substrate cortactin	CTTN	14230000			Serpin B6	SERPINB6	20266000
U6 snRNA-associated Sm-like protein LSm2	LSM2	14199800			NEDD8	NEDD8	2.02097e+07
Serpin B6	SERPINB6	1.41723e+07			Alanine--tRNA ligase, cytoplasmic	AARS	20188000
Melanotransferrin	MFI2	14070300			Neudesin	NENF	2.01687e+07
26S proteasome non-ATPase regulatory subunit 11	PSMD11	1.40417e+07			Adenine phosphoribosyltransferase	APRT	20105000
NEDD8	NEDD8	1.39969e+07			Ras-related protein Rab-11B;Ras-related protein Rab-11A	RAB11B;RAB11A	2.00457e+07
28 kDa heat- and acid-stable phosphoprotein	PDAP1	1.39893e+07			RuvB-like 1	RUVBL1	20036700
Ras-related C3 botulinum toxin substrate 1;Ras-related C3 botulinum toxin substrate 3;Ras-related C3 botulinum toxin substrate 2	RAC1;RAC3;RAC2	1.39554e+07			Methylmalonate-semialdehyde dehydrogenase [acylating], mitochondrial	ALDH6A1	2.00267e+07
COP9 signalosome complex subunit 8	COPS8	1.38867e+07			26S proteasome non-ATPase regulatory subunit 1	PSMD1	2.00063e+07
Hepatoma-derived growth factor	HDGF	1.38697e+07			Lysosomal alpha-glucosidase;76 kDa lysosomal alpha-glucosidase;70 kDa lysosomal alpha-glucosidase	GAA	1.99423e+07
Enoyl-CoA hydratase, mitochondrial	ECHS1	1.37997e+07			Small nuclear ribonucleoprotein Sm D2	SNRPD2	1.98623e+07
Cold-inducible RNA-binding protein	CIRBP	1.37797e+07			Scrapie-responsive protein 1	SCRG1	19851100
Filamin-B	FLNB	13693000			Phosphoenolpyruvate carboxykinase [GTP], mitochondrial	PCK2	19784000
Farnesyl pyrophosphate synthase	FDPS	1.36916e+07			cAMP-dependent protein kinase type II-alpha regulatory subunit	PRKAR2A	1.97647e+07
Alpha-soluble NSF attachment protein	NAPA	1.36887e+07			Cytochrome b-c1 complex subunit 1, mitochondrial	UQCRC1	1.97187e+07
Cell division control protein 42 homolog	CDC42	13681000			Sodium/potassium-transporting ATPase subunit alpha-1	ATP1A1	19715000
Guanine nucleotide-binding protein G(I)/G(S)/G(O) subunit gamma-12	GNG12	1.36393e+07			Ubiquitin-conjugating enzyme E2 variant 1	UBE2V1	1.97057e+07
Vesicle-associated membrane protein 3;Vesicle-associated membrane protein 2	VAMP3;VAMP2	1.36095e+07			Interleukin-17B	IL17B	19495100
Protein LBH	LBH	13582300			Arginine--tRNA ligase, cytoplasmic	RARS	1.94687e+07
ADP-ribosylation factor-like protein 1	ARL1	1.35717e+07			Ragulator complex protein LAMTOR5	LAMTOR5	1.94673e+07
Rho GTPase-activating protein 1	ARHGAP1	1.35467e+07			Up-regulated during skeletal muscle growth protein 5	USMG5	19397000
COP9 signalosome complex subunit 6	COPS6	1.35161e+07			26S proteasome non-ATPase regulatory subunit 14	PSMD14	19395000
Serine-threonine kinase receptor-associated protein	STRAP	1.35054e+07			26S proteasome non-ATPase regulatory subunit 13	PSMD13	19380000
Osteoclast-stimulating factor 1	OSTF1	13474300			BTB/POZ domain-containing protein KCTD12	KCTD12	19359000
Cytochrome c	CYCS	1.34607e+07			Pannexin-3	PANX3	1.93447e+07
Adipocyte enhancer-binding protein 1	AEBP1	1.3395e+07			26S protease regulatory subunit 4	PSMC1	1.93393e+07
Signal recognition particle 9 kDa protein	SRP9	1.33313e+07			Fructose-bisphosphate aldolase C	ALDOC	19306600
26S protease regulatory subunit 6B	PSMC4	1.32221e+07			Small nuclear ribonucleoprotein Sm D3	SNRPD3	1.92947e+07
Transmembrane protein 43	TMEM43	13221900			Superoxide dismutase [Mn], mitochondrial	SOD2	1.92734e+07
Heterogeneous nuclear ribonucleoprotein A3	HNRNPA3	1.31993e+07			Polypyrimidine tract-binding protein 1	PTBP1	1.9143e+07
26S protease regulatory subunit 4	PSMC1	1.31873e+07			Vesicular integral-membrane protein VIP36	LMAN2	1.91163e+07
Aspartate aminotransferase, cytoplasmic	GOT1	1.31777e+07			Transmembrane protein 43	TMEM43	19089400
T-complex protein 1 subunit eta	CCT7	1.31557e+07			Actin-related protein 2/3 complex subunit 5-like protein	ARPC5L	1.90557e+07
Synaptonemal complex protein SC65	LEPREL4	1.31057e+07			Mitochondrial fission 1 protein	FIS1	1.90055e+07
Eukaryotic translation initiation factor 3 subunit J	EIF3J	1.30854e+07			26S proteasome non-ATPase regulatory subunit 5	PSMD5	1.89593e+07
Ras-related protein Rab-11B;Ras-related protein Rab-11A	RAB11B;RAB11A	1.30843e+07			Farnesyl pyrophosphate synthase	FDPS	18952000
Nidogen-2	NID2	1.30147e+07			Eukaryotic translation initiation factor 3 subunit I	EIF3I	18876000
Thrombospondin-3	THBS3	1.29617e+07			Bifunctional purine biosynthesis protein PURH;Phosphoribosylaminoimidazolecarboxamide formyltransferase;IMP cyclohydrolase	ATIC	1.87943e+07
26S protease regulatory subunit 10B	PSMC6	1.2821e+07			40S ribosomal protein S15	RPS15	18789000
60S ribosomal protein L18a	RPL18A	12791300			T-complex protein 1 subunit eta	CCT7	18730000
C-type lectin domain family 11 member A	CLEC11A	1.27511e+07			Eukaryotic translation initiation factor 3 subunit M	EIF3M	18700800
Prefoldin subunit 4	PFDN4	12723500			Actin-related protein 2/3 complex subunit 3	ARPC3	1.86028e+07
Synaptic vesicle membrane protein VAT-1 homolog	VAT1	1.26822e+07			26S protease regulatory subunit 10B	PSMC6	18556500
RNA-binding protein FUS	FUS	1.26807e+07			Isopentenyl-diphosphate Delta-isomerase 1	IDI1	1.85533e+07
Nucleobindin-1	NUCB1	12676700			26S protease regulatory subunit 7	PSMC2	18546000
RuvB-like 1	RUVBL1	1.26717e+07			Ubiquitin thioesterase OTUB1	OTUB1	1.85435e+07
Alanine--tRNA ligase, cytoplasmic	AARS	1.26622e+07			Trifunctional enzyme subunit alpha, mitochondrial;Long-chain enoyl-CoA hydratase;Long chain 3-hydroxyacyl-CoA dehydrogenase	HADHA	18514000
Fibulin-2	FBLN2	12656100			Microtubule-associated protein RP/EB family member 1	MAPRE1	1.84047e+07
Tyrosine--tRNA ligase, cytoplasmic;Tyrosine--tRNA ligase, cytoplasmic, N-terminally processed	YARS	1.26198e+07			Rab GDP dissociation inhibitor alpha	GDI1	1.83427e+07
40S ribosomal protein S15	RPS15	1.261e+07			Microsomal glutathione S-transferase 1	MGST1	18317000
Electron transfer flavoprotein subunit beta	ETFB	12598300			Protein Niban	FAM129A	1.82903e+07
Cartilage intermediate layer protein 2;Cartilage intermediate layer protein 2 C1;Cartilage intermediate layer protein 2 C2	CILP2	1.25873e+07			Dynactin subunit 2	DCTN2	1.82317e+07
Collagen alpha-3(IX) chain	COL9A3	1.25847e+07			ATP synthase subunit f, mitochondrial	ATP5J2	1.81867e+07
Ubiquitin-conjugating enzyme E2 variant 1	UBE2V1	1.25815e+07			Polyadenylate-binding protein 4	PABPC4	18178000
6-phosphogluconate dehydrogenase, decarboxylating	PGD	12574000			Collagen alpha-2(VI) chain	COL6A2	18100000
Fibroblast growth factor-binding protein 2	FGFBP2	1.25578e+07			60S ribosomal protein L31	RPL31	1.80807e+07
Oligosaccharyltransferase complex subunit OSTC	OSTC	1.25383e+07			Astrocytic phosphoprotein PEA-15	PEA15	18074500
Interleukin enhancer-binding factor 3	ILF3	1.25143e+07			Gamma-enolase	ENO2	1.80066e+07
U6 snRNA-associated Sm-like protein LSm5	LSM5	12493000			Apolipoprotein A-II;Proapolipoprotein A-II;Truncated apolipoprotein A-II	APOA2	1.79633e+07
ATP synthase subunit O, mitochondrial	ATP5O	12424000			Isoleucine--tRNA ligase, cytoplasmic	IARS	1.79153e+07
Leukocyte cell-derived chemotaxin 1;Chondrosurfactant protein;Chondromodulin-1	LECT1	1.24214e+07			Membrane-associated progesterone receptor component 2	PGRMC2	1.77652e+07
Dynactin subunit 2	DCTN2	12356000			Tripeptidyl-peptidase 1	TPP1	1.77373e+07
Pyridoxal kinase	PDXK	1.23437e+07			26S proteasome non-ATPase regulatory subunit 2	PSMD2	17700000
Serine/threonine-protein kinase 26	STK26	1.23396e+07			Septin-7	SEPT7	1.76653e+07
Methylmalonate-semialdehyde dehydrogenase [acylating], mitochondrial	ALDH6A1	1.22223e+07			Septin-2	SEPT2	17607400
Prohibitin-2	PHB2	1.21997e+07			Eukaryotic translation initiation factor 3 subunit J	EIF3J	1.75813e+07
Cathepsin Z	CTSZ	12146100			Low molecular weight phosphotyrosine protein phosphatase	ACP1	17566000
40S ribosomal protein S29	RPS29	12062400			ATP-dependent RNA helicase DDX1	DDX1	1.7497e+07
Cytochrome b-c1 complex subunit 1, mitochondrial	UQCRC1	1.20521e+07			1,4-alpha-glucan-branching enzyme	GBE1	17429000
V-type proton ATPase subunit G 1	ATP6V1G1	11976200			Sideroflexin-1	SFXN1	1.74208e+07
Tubulin-specific chaperone A	TBCA	1.19761e+07			Hydroxyacyl-coenzyme A dehydrogenase, mitochondrial	HADH	1.7411e+07
Histone-binding protein RBBP4	RBBP4	1.19477e+07			Stress-induced-phosphoprotein 1	STIP1	1.73907e+07
Asparagine--tRNA ligase, cytoplasmic	NARS	11946200			Peptidyl-prolyl cis-trans isomerase FKBP2	FKBP2	1.73662e+07
Sushi repeat-containing protein SRPX2	SRPX2	1.19033e+07			Serine hydroxymethyltransferase, mitochondrial	SHMT2	1.72303e+07
Vesicular integral-membrane protein VIP36	LMAN2	11843700			26S protease regulatory subunit 8	PSMC5	17216900
Ferritin heavy chain;Ferritin heavy chain, N-terminally processed	FTH1	1.18107e+07			Leukocyte cell-derived chemotaxin 1;Chondrosurfactant protein;Chondromodulin-1	LECT1	1.71579e+07
DnaJ homolog subfamily B member 11	DNAJB11	1.17597e+07			60S ribosomal protein L28	RPL28	1.71383e+07
60S ribosomal protein L31	RPL31	11756000			Hepatoma-derived growth factor	HDGF	1.71307e+07
Ribose-phosphate pyrophosphokinase 1	PRPS1	1.17421e+07			Tubulin beta-6 chain	TUBB6	1.71027e+07
Alpha/beta hydrolase domain-containing protein 14B	ABHD14B	11735200			Prefoldin subunit 6	PFDN6	1.70819e+07
Eukaryotic translation initiation factor 3 subunit K	EIF3K	11711300			Glycosyltransferase 8 domain-containing protein 1	GLT8D1	17053800
Bifunctional glutamate/proline--tRNA ligase;Glutamate--tRNA ligase;Proline--tRNA ligase	EPRS	1.17096e+07			28 kDa heat- and acid-stable phosphoprotein	PDAP1	1.70499e+07
ADP/ATP translocase 3;ADP/ATP translocase 3, N-terminally processed	SLC25A6	1.17077e+07			Very long-chain specific acyl-CoA dehydrogenase, mitochondrial	ACADVL	17030200
EGF-like repeat and discoidin I-like domain-containing protein 3	EDIL3	1.17053e+07			Delta(3,5)-Delta(2,4)-dienoyl-CoA isomerase, mitochondrial	ECH1	1.69993e+07
Cullin-associated NEDD8-dissociated protein 1	CAND1	11676000			Eukaryotic translation initiation factor 2 subunit 2	EIF2S2	1.69697e+07
Flavin reductase (NADPH)	BLVRB	11672000			Adenylate kinase 2, mitochondrial;Adenylate kinase 2, mitochondrial, N-terminally processed	AK2	1.69623e+07
Serine hydroxymethyltransferase, mitochondrial	SHMT2	1.15802e+07			Vesicle-associated membrane protein 3;Vesicle-associated membrane protein 2	VAMP3;VAMP2	1.69507e+07
Cytochrome b5 type B	CYB5B	1.15448e+07			X-ray repair cross-complementing protein 6	XRCC6	1.69427e+07
40S ribosomal protein S27-like	RPS27L	1.15327e+07			Glutathione peroxidase 7	GPX7	1.68564e+07
Coatomer subunit alpha;Xenin;Proxenin	COPA	11523700			Programmed cell death 6-interacting protein	PDCD6IP	1.67287e+07
Plasminogen activator inhibitor 1 RNA-binding protein	SERBP1	1.15213e+07			Thrombospondin-2	THBS2	1.66616e+07
Transgelin	TAGLN	11486700			Fumarylacetoacetase	FAH	16658000
26S proteasome non-ATPase regulatory subunit 14	PSMD14	1.14486e+07			Aconitate hydratase, mitochondrial	ACO2	1.66427e+07
Chromobox protein homolog 3	CBX3	1.14268e+07			Interleukin enhancer-binding factor 3	ILF3	1.6605e+07
ATP-dependent RNA helicase DDX1	DDX1	11418800			U6 snRNA-associated Sm-like protein LSm5	LSM5	16577000
X-ray repair cross-complementing protein 6	XRCC6	1.14139e+07			Heterogeneous nuclear ribonucleoprotein L	HNRNPL	16567200
26S proteasome non-ATPase regulatory subunit 1	PSMD1	11380700			Niban-like protein 1	FAM129B	16508900
LDLR chaperone MESD	MESDC2	1.13164e+07			Flavin reductase (NADPH)	BLVRB	16481800
Low molecular weight phosphotyrosine protein phosphatase	ACP1	1.12722e+07			Small ubiquitin-related modifier 4;Small ubiquitin-related modifier 2;Small ubiquitin-related modifier 3	SUMO4;SUMO2;SUMO3	1.64683e+07
Septin-5	SEPT5	11200100			Beta-hexosaminidase subunit beta;Beta-hexosaminidase subunit beta chain B;Beta-hexosaminidase subunit beta chain A	HEXB	16434800
Annexin A11	ANXA11	1.11993e+07			Procollagen-lysine,2-oxoglutarate 5-dioxygenase 1	PLOD1	1.64053e+07
Microtubule-associated protein RP/EB family member 1	MAPRE1	1.11706e+07			Connective tissue growth factor	CTGF	1.63753e+07
Apolipoprotein D	APOD	11168500			Cytochrome b5 type B	CYB5B	16300000
Stress-induced-phosphoprotein 1	STIP1	1.11679e+07			Lupus La protein	SSB	1.62767e+07
Purine nucleoside phosphorylase	PNP	1.11121e+07			Peroxisomal multifunctional enzyme type 2;(3R)-hydroxyacyl-CoA dehydrogenase;Enoyl-CoA hydratase 2	HSD17B4	1.62227e+07
Eukaryotic translation initiation factor 4E	EIF4E	1.10761e+07			DnaJ homolog subfamily B member 11	DNAJB11	1.62115e+07
Phosphoglucomutase-2	PGM2	1.10719e+07			26S protease regulatory subunit 6A	PSMC3	16136600
Acetyl-CoA acetyltransferase, cytosolic	ACAT2	11071300			NADP-dependent malic enzyme	ME1	1.61337e+07
Dynein light chain Tctex-type 3	DYNLT3	1.10168e+07			Proliferation-associated protein 2G4	PA2G4	1.61183e+07
Heterogeneous nuclear ribonucleoprotein F;Heterogeneous nuclear ribonucleoprotein F, N-terminally processed	HNRNPF	1.09735e+07			Guanine nucleotide-binding protein G(I)/G(S)/G(O) subunit gamma-12	GNG12	1.60938e+07
Heat shock 70 kDa protein 4	HSPA4	10947600			Tubulin-specific chaperone A	TBCA	16036200
26S proteasome non-ATPase regulatory subunit 13	PSMD13	1.09202e+07			Nucleosome assembly protein 1-like 4	NAP1L4	1.60263e+07
Histone H1.5	HIST1H1B	1.09013e+07			Ras-related protein Rab-5C	RAB5C	16024000
Eukaryotic translation initiation factor 2 subunit 2	EIF2S2	10869700			Protein-L-isoaspartate(D-aspartate) O-methyltransferase	PCMT1	1.59293e+07
Heme-binding protein 2	HEBP2	1.08527e+07			Putative heat shock protein HSP 90-beta 4	HSP90AB4P	1.57757e+07
Complement C1q tumor necrosis factor-related protein 3	C1QTNF3	1.07955e+07			Threonine--tRNA ligase, cytoplasmic	TARS	15741700
Importin subunit alpha-3	KPNA4	1.079e+07			Serum paraoxonase/arylesterase 2	PON2	1.57012e+07
26S protease regulatory subunit 7	PSMC2	1.07745e+07			Cullin-associated NEDD8-dissociated protein 1	CAND1	15589500
Drebrin-like protein	DBNL	1.07729e+07			Transmembrane emp24 domain-containing protein 2	TMED2	1.55818e+07
Secernin-1	SCRN1	1.07585e+07			6-phosphogluconate dehydrogenase, decarboxylating	PGD	1.55576e+07
Cytochrome b-c1 complex subunit 6, mitochondrial	UQCRH	1.07556e+07			Fatty acid-binding protein, heart	FABP3	15548000
Ragulator complex protein LAMTOR5	LAMTOR5	1.07531e+07			Calponin-3	CNN3	1.54744e+07
Proteasome subunit beta type-7	PSMB7	1.07418e+07			Serine/threonine-protein phosphatase CPPED1	CPPED1	15473000
Ras-related protein Rab-14	RAB14	1.07352e+07			Parathymosin	PTMS	1.54437e+07
Spectrin beta chain, non-erythrocytic 1	SPTBN1	1.06767e+07			Lysosome-associated membrane glycoprotein 1	LAMP1	1.54016e+07
Small nuclear ribonucleoprotein F	SNRPF	10620400			Thioredoxin domain-containing protein 12	TXNDC12	1.53056e+07
Arginine--tRNA ligase, cytoplasmic	RARS	1.06053e+07			Inosine triphosphate pyrophosphatase	ITPA	1.52099e+07
Transformer-2 protein homolog beta	TRA2B	10600600			26S proteasome non-ATPase regulatory subunit 6	PSMD6	1.51521e+07
Up-regulated during skeletal muscle growth protein 5	USMG5	1.05927e+07			Procollagen galactosyltransferase 1	COLGALT1	1.50953e+07
RuvB-like 2	RUVBL2	10527400			Reticulon-4	RTN4	1.50063e+07
Dynein light chain roadblock-type 1;Dynein light chain roadblock-type 2	DYNLRB1;DYNLRB2	1.05257e+07			Signal recognition particle 9 kDa protein	SRP9	14971500
Alpha-centractin	ACTR1A	10520500			14 kDa phosphohistidine phosphatase	PHPT1	14921800
Cystatin-C	CST3	10472200			NADH-cytochrome b5 reductase 1	CYB5R1	14899000
Copine-1	CPNE1	1.04419e+07			26S proteasome non-ATPase regulatory subunit 3	PSMD3	1.48821e+07
Calpain-2 catalytic subunit	CAPN2	10436800			Putative phospholipase B-like 2;Putative phospholipase B-like 2 32 kDa form;Putative phospholipase B-like 2 45 kDa form	PLBD2	1.48522e+07
Heterogeneous nuclear ribonucleoprotein U-like protein 2	HNRNPUL2	1.0436e+07			Small nuclear ribonucleoprotein G;Putative small nuclear ribonucleoprotein G-like protein 15	SNRPG;SNRPGP15	1.48382e+07
Membrane-associated progesterone receptor component 1	PGRMC1	10407400			Transmembrane 9 superfamily member 3	TM9SF3	14830500
UPF0587 protein C1orf123	C1orf123	1.03493e+07			Isochorismatase domain-containing protein 2, mitochondrial	ISOC2	14817200
Ubiquitin thioesterase OTUB1	OTUB1	10323800			C-type mannose receptor 2	MRC2	1.47965e+07
Delta-1-pyrroline-5-carboxylate synthase;Glutamate 5-kinase;Gamma-glutamyl phosphate reductase	ALDH18A1	1.02998e+07			RNA-binding protein 3	RBM3	14784200
Ras-related protein Rab-5C	RAB5C	1.02391e+07			Eukaryotic translation initiation factor 3 subunit F	EIF3F	1.47449e+07
Selenoprotein M	SELM	10237000			GDP-L-fucose synthase	TSTA3	14727500
U1 small nuclear ribonucleoprotein A	SNRPA	1.02176e+07			Mitochondrial 10-formyltetrahydrofolate dehydrogenase	ALDH1L2	14641000
Prolyl 3-hydroxylase 3	LEPREL2	1.01883e+07			Cytochrome b-c1 complex subunit 2, mitochondrial	UQCRC2	1.46197e+07
Beta-galactosidase	GLB1	1.01613e+07			Hexokinase-1	HK1	1.46032e+07
Proliferation-associated protein 2G4	PA2G4	1.00964e+07			Ubiquitin carboxyl-terminal hydrolase 14	USP14	1.46008e+07
Sodium/potassium-transporting ATPase subunit alpha-1	ATP1A1	1.00794e+07			U6 snRNA-associated Sm-like protein LSm3	LSM3	14571500
DNA-(apurinic or apyrimidinic site) lyase;DNA-(apurinic or apyrimidinic site) lyase, mitochondrial	APEX1	1.00715e+07			Collagen alpha-3(IX) chain	COL9A3	1.45711e+07
Peptidyl-prolyl cis-trans isomerase FKBP2	FKBP2	1.00713e+07			Heterogeneous nuclear ribonucleoprotein A3	HNRNPA3	14559000
Prefoldin subunit 6	PFDN6	10053700			SEC23-interacting protein	SEC23IP	1.45361e+07
Small nuclear ribonucleoprotein E	SNRPE	1.00445e+07			Plasminogen activator inhibitor 1 RNA-binding protein	SERBP1	14475100
Fermitin family homolog 2	FERMT2	1.00087e+07			Histone-binding protein RBBP4	RBBP4	1.44687e+07
WW domain-binding protein 2	WBP2	9.97103e+06			Acetyl-CoA acetyltransferase, cytosolic	ACAT2	1.44595e+07
cAMP-dependent protein kinase type II-alpha regulatory subunit	PRKAR2A	9939500			Cytosol aminopeptidase	LAP3	14450000
26S proteasome non-ATPase regulatory subunit 2	PSMD2	9.93743e+06			Ribulose-phosphate 3-epimerase	RPE	14432500
BAG family molecular chaperone regulator 3	BAG3	9908900			Mitochondrial import inner membrane translocase subunit Tim9	TIMM9	14431300
Protein disulfide-isomerase A5	PDIA5	9885700			Ras suppressor protein 1	RSU1	1.43939e+07
Melanoma-derived growth regulatory protein	MIA	9.88427e+06			High mobility group protein B1;Putative high mobility group protein B1-like 1	HMGB1;HMGB1P1	14390000
26S proteasome non-ATPase regulatory subunit 5	PSMD5	9836600			Transcription factor BTF3	BTF3	1.4341e+07
Zyxin	ZYX	9.74103e+06			Rho GTPase-activating protein 1	ARHGAP1	1.43353e+07
Matrilin-4	MATN4	9.74057e+06			Vesicle-associated membrane protein-associated protein A	VAPA	14316000
Nucleolar protein 3	NOL3	9.71513e+06			CD166 antigen	ALCAM	1.42923e+07
Signal recognition particle receptor subunit beta	SRPRB	9.65997e+06			Cytokine-like protein 1	CYTL1	14288800
Isopentenyl-diphosphate Delta-isomerase 1	IDI1	9.65043e+06			Annexin A7	ANXA7	1.42487e+07
Beta-2-microglobulin;Beta-2-microglobulin form pI 5.3	B2M	9.62063e+06			Phosphate carrier protein, mitochondrial	SLC25A3	14204700
Y-box-binding protein 3	YBX3	9468300			Dihydrolipoyl dehydrogenase, mitochondrial	DLD	1.41764e+07
26S proteasome non-ATPase regulatory subunit 6	PSMD6	9.45953e+06			Ribosyldihydronicotinamide dehydrogenase [quinone]	NQO2	1.41713e+07
Mitochondrial fission 1 protein	FIS1	9.45367e+06			Alpha-centractin	ACTR1A	14150900
Bifunctional purine biosynthesis protein PURH;Phosphoribosylaminoimidazolecarboxamide formyltransferase;IMP cyclohydrolase	ATIC	9.44997e+06			Lysosomal protective protein;Lysosomal protective protein 32 kDa chain;Lysosomal protective protein 20 kDa chain	CTSA	14106100
Isoleucine--tRNA ligase, cytoplasmic	IARS	9422700			Drebrin-like protein	DBNL	1.40906e+07
Calcineurin subunit B type 1	PPP3R1	9.42057e+06			Glutathione reductase, mitochondrial	GSR	14076000
1,4-alpha-glucan-branching enzyme	GBE1	9.41447e+06			Aminoacyl tRNA synthase complex-interacting multifunctional protein 1;Endothelial monocyte-activating polypeptide 2	AIMP1	14029600
Inhibitor of nuclear factor kappa-B kinase-interacting protein	IKBIP	9.40897e+06			Eukaryotic translation initiation factor 3 subunit G	EIF3G	1.39676e+07
Serine/arginine-rich splicing factor 2;Serine/arginine-rich splicing factor 8	SRSF2;SRSF8	9.40503e+06			Aldehyde dehydrogenase, mitochondrial	ALDH2	13935000
26S protease regulatory subunit 6A	PSMC3	9.39747e+06			Transmembrane protein 119	TMEM119	1.37982e+07
Prolow-density lipoprotein receptor-related protein 1;Low-density lipoprotein receptor-related protein 1 85 kDa subunit;Low-density lipoprotein receptor-related protein 1 515 kDa subunit;Low-density lipoprotein receptor-related protein 1 intracellular domain	LRP1	9.39507e+06			Core histone macro-H2A.1	H2AFY	1.37263e+07
NADP-dependent malic enzyme	ME1	9366600			LDLR chaperone MESD	MESDC2	1.37237e+07
Elongation factor Tu, mitochondrial	TUFM	9.34533e+06			N-acetyl-D-glucosamine kinase	NAGK	1.37058e+07
N-acetyl-D-glucosamine kinase	NAGK	9344700			Cytochrome c oxidase subunit 7A2, mitochondrial	COX7A2	1.36727e+07
Proenkephalin-A;Synenkephalin;Met-enkephalin;PENK(114-133);PENK(143-183);Met-enkephalin-Arg-Gly-Leu;Leu-enkephalin;PENK(237-258);Met-enkephalin-Arg-Phe	PENK	9340100			Prefoldin subunit 5	PFDN5	13659400
Cytosolic non-specific dipeptidase	CNDP2	9.32483e+06			Ras-related protein Rab-14	RAB14	1.36496e+07
S-adenosylmethionine synthase isoform type-2	MAT2A	9.31313e+06			Osteoclast-stimulating factor 1	OSTF1	1.36352e+07
Protein canopy homolog 4	CNPY4	9296000			39S ribosomal protein L12, mitochondrial	MRPL12	1.35843e+07
Acidic leucine-rich nuclear phosphoprotein 32 family member B	ANP32B	9.16817e+06			Eukaryotic peptide chain release factor subunit 1	ETF1	1.35776e+07
Aminoacyl tRNA synthase complex-interacting multifunctional protein 1;Endothelial monocyte-activating polypeptide 2	AIMP1	9.16387e+06			DNA-(apurinic or apyrimidinic site) lyase;DNA-(apurinic or apyrimidinic site) lyase, mitochondrial	APEX1	1.35679e+07
Ubiquitin carboxyl-terminal hydrolase isozyme L3	UCHL3	9.13953e+06			Signal recognition particle receptor subunit beta	SRPRB	1.35557e+07
Eukaryotic translation initiation factor 3 subunit M	EIF3M	9138600			Y-box-binding protein 3	YBX3	13526500
Polyadenylate-binding protein 4	PABPC4	9119300			Glucosamine 6-phosphate N-acetyltransferase	GNPNAT1	1.35199e+07
Ferritin light chain	FTL	9.10253e+06			Ubiquitin carboxyl-terminal hydrolase 5	USP5	1.35198e+07
Protein kinase C and casein kinase substrate in neurons protein 2	PACSIN2	9.07507e+06			Guanylate kinase	GUK1	1.35043e+07
Adenine phosphoribosyltransferase	APRT	9.06877e+06			Nucleolar protein 3	NOL3	1.34643e+07
Peptidyl-prolyl cis-trans isomerase FKBP3	FKBP3	9.05303e+06			26S proteasome non-ATPase regulatory subunit 7	PSMD7	13457700
Tax1-binding protein 3	TAX1BP3	9042000			Myc box-dependent-interacting protein 1	BIN1	13395400
Putative heat shock protein HSP 90-beta 4	HSP90AB4P	9034000			Eukaryotic translation initiation factor 3 subunit B	EIF3B	1.338e+07
Eukaryotic translation initiation factor 3 subunit I	EIF3I	8.97853e+06			Filamin-B	FLNB	1.33727e+07
Target of Nesh-SH3	ABI3BP	8.94517e+06			Dynein light chain roadblock-type 1;Dynein light chain roadblock-type 2	DYNLRB1;DYNLRB2	1.32713e+07
Glycosyltransferase 8 domain-containing protein 1	GLT8D1	8919450			Aldose reductase	AKR1B1	13264600
Signal transducer and activator of transcription 3	STAT3	8.91587e+06			Acidic leucine-rich nuclear phosphoprotein 32 family member B	ANP32B	1.32551e+07
Prefoldin subunit 5	PFDN5	8.91477e+06			Neuroblast differentiation-associated protein AHNAK	AHNAK	1.32246e+07
Beta-crystallin S	CRYGS	8.90617e+06			Dolichyl-diphosphooligosaccharide--protein glycosyltransferase subunit DAD1	DAD1	13216300
Phosphatidylinositol-binding clathrin assembly protein	PICALM	8.87353e+06			Cytochrome c oxidase subunit 5B, mitochondrial	COX5B	13126000
Core-binding factor subunit beta	CBFB	8.86327e+06			WD repeat-containing protein 61;WD repeat-containing protein 61, N-terminally processed	WDR61	13110200
26S proteasome non-ATPase regulatory subunit 7	PSMD7	8862000			Zyxin	ZYX	13069900
Matrin-3	MATR3	8.83107e+06			Importin subunit alpha-4	KPNA3	1.30508e+07
Threonine--tRNA ligase, cytoplasmic	TARS	8817800			Putative heat shock protein HSP 90-beta 2	HSP90AB2P	12920200
Stomatin-like protein 2, mitochondrial	STOML2	8813800			Cathepsin Z	CTSZ	12898000
Lysosome membrane protein 2	SCARB2	8.81303e+06			Cytochrome b-c1 complex subunit 7	UQCRB	12896000
Suppressor of G2 allele of SKP1 homolog	SUGT1	8.81033e+06			Eukaryotic translation initiation factor 4E	EIF4E	1.28779e+07
Protein transport protein Sec61 subunit alpha isoform 1	SEC61A1	8.79033e+06			UPF0587 protein C1orf123	C1orf123	12710300
Signal recognition particle 14 kDa protein	SRP14	8.78143e+06			Mitochondrial dicarboxylate carrier	SLC25A10	1.26846e+07
Vesicle-associated membrane protein-associated protein A	VAPA	8755800			60S ribosomal protein L34	RPL34	1.26453e+07
Endophilin-A2	SH3GL1	8.74557e+06			Calpain-2 catalytic subunit	CAPN2	1.26337e+07
Aspartate aminotransferase, mitochondrial	GOT2	8.74363e+06			Proteasome activator complex subunit 3	PSME3	1.26208e+07
Cytochrome b-c1 complex subunit 2, mitochondrial	UQCRC2	8724600			Endoplasmic reticulum-Golgi intermediate compartment protein 1	ERGIC1	1.26188e+07
Programmed cell death protein 5	PDCD5	8.71937e+06			Small nuclear ribonucleoprotein F	SNRPF	1.26187e+07
Glutathione S-transferase Mu 3	GSTM3	8699700			V-type proton ATPase subunit B, brain isoform	ATP6V1B2	12615500
26S protease regulatory subunit 8	PSMC5	8679200			Asparagine synthetase [glutamine-hydrolyzing]	ASNS	12591500
Putative heat shock protein HSP 90-beta 2	HSP90AB2P	8.66607e+06			Eukaryotic translation initiation factor 1A, Y-chromosomal	EIF1AY	1.25709e+07
Transcription factor BTF3	BTF3	8660500			N-acetylglucosamine-6-sulfatase	GNS	12569000
Lipoma-preferred partner	LPP	8.63837e+06			Phosphatidylinositol-binding clathrin assembly protein	PICALM	12539900
Serum paraoxonase/arylesterase 2	PON2	8.59203e+06			Argininosuccinate synthase	ASS1	1.24513e+07
Cytochrome c oxidase subunit 7A2, mitochondrial	COX7A2	8590000			ERO1-like protein alpha	ERO1L	1.24162e+07
ATP-dependent 6-phosphofructokinase, platelet type	PFKP	8.58847e+06			Hypoxanthine-guanine phosphoribosyltransferase	HPRT1	12414800
Core histone macro-H2A.1	H2AFY	8543600			Succinate dehydrogenase [ubiquinone] flavoprotein subunit, mitochondrial	SDHA	12380400
26S proteasome non-ATPase regulatory subunit 3	PSMD3	8.53107e+06			GTP-binding protein SAR1b	SAR1B	12331000
Cytoplasmic dynein 1 intermediate chain 2	DYNC1I2	8.50743e+06			Importin subunit alpha-3	KPNA4	1.23192e+07
Endoplasmic reticulum-Golgi intermediate compartment protein 1	ERGIC1	8.48287e+06			Beta-crystallin S	CRYGS	1.22584e+07
Transmembrane 9 superfamily member 3	TM9SF3	8472900			Histidine--tRNA ligase, cytoplasmic	HARS	1.22554e+07
Keratinocyte-associated protein 2	KRTCAP2	8.46287e+06			Protein transport protein Sec24D	SEC24D	12198400
Eukaryotic translation initiation factor 3 subunit G	EIF3G	8.43283e+06			Keratinocyte-associated protein 2	KRTCAP2	12145700
Cytosol aminopeptidase	LAP3	8.41547e+06			S-adenosylmethionine synthase isoform type-2	MAT2A	12110400
Sodium/potassium-transporting ATPase subunit beta-1	ATP1B1	8407700			COP9 signalosome complex subunit 4	COPS4	12108100
Aflatoxin B1 aldehyde reductase member 2	AKR7A2	8385800			RNA-binding protein FUS	FUS	1.21061e+07
Glycogenin-1	GYG1	8.35707e+06			Prolow-density lipoprotein receptor-related protein 1;Low-density lipoprotein receptor-related protein 1 85 kDa subunit;Low-density lipoprotein receptor-related protein 1 515 kDa subunit;Low-density lipoprotein receptor-related protein 1 intracellular domain	LRP1	12083400
Protein LYRIC	MTDH	8.35637e+06			Calcium/calmodulin-dependent protein kinase type II subunit delta	CAMK2D	1.19937e+07
Tropomodulin-3	TMOD3	8325700			Dual specificity mitogen-activated protein kinase kinase 1	MAP2K1	1.19822e+07
Hypoxanthine-guanine phosphoribosyltransferase	HPRT1	8.27397e+06			Cytochrome c oxidase subunit 6B1	COX6B1	1.19759e+07
Glutathione reductase, mitochondrial	GSR	8.26313e+06			Phosphomannomutase 2	PMM2	11975600
COP9 signalosome complex subunit 4	COPS4	8.24587e+06			Selenoprotein M	SELM	11945000
Actin-related protein 2/3 complex subunit 5-like protein	ARPC5L	8239000			NHP2-like protein 1;NHP2-like protein 1, N-terminally processed	NHP2L1	1.1936e+07
Coiled-coil-helix-coiled-coil-helix domain-containing protein 2;Putative coiled-coil-helix-coiled-coil-helix domain-containing protein CHCHD2P9, mitochondrial	CHCHD2;CHCHD2P9	8.23067e+06			Aflatoxin B1 aldehyde reductase member 2	AKR7A2	1.19347e+07
Pre-mRNA-processing factor 19	PRPF19	8230300			Golgi-associated PDZ and coiled-coil motif-containing protein	GOPC	1.19206e+07
Immediate early response 3-interacting protein 1	IER3IP1	8.22943e+06			V-type proton ATPase catalytic subunit A	ATP6V1A	1.18939e+07
Niban-like protein 1	FAM129B	8225300			Xaa-Pro dipeptidase	PEPD	11890000
Protein transport protein Sec24D	SEC24D	8197800			RuvB-like 2	RUVBL2	1.18782e+07
Alpha-aminoadipic semialdehyde dehydrogenase	ALDH7A1	8172800			Heterogeneous nuclear ribonucleoprotein F;Heterogeneous nuclear ribonucleoprotein F, N-terminally processed	HNRNPF	1.1856e+07
Guanylate kinase	GUK1	8.16593e+06			Glycogenin-1	GYG1	11843900
Beta-hexosaminidase subunit beta;Beta-hexosaminidase subunit beta chain B;Beta-hexosaminidase subunit beta chain A	HEXB	8.15327e+06			Endophilin-A2	SH3GL1	1.18342e+07
Erythrocyte band 7 integral membrane protein	STOM	8152800			Eukaryotic translation initiation factor 3 subunit D	EIF3D	11801400
UDP-glucose:glycoprotein glucosyltransferase 1	UGGT1	8.07097e+06			Tripeptidyl-peptidase 2	TPP2	1.17272e+07
Reticulon-4	RTN4	8.03453e+06			Valine--tRNA ligase	VARS	1.16809e+07
BTB/POZ domain-containing protein KCTD12	KCTD12	8.03013e+06			Signal transducer and activator of transcription 3	STAT3	1.16076e+07
RNA-binding protein 8A	RBM8A	7981700			Protein transport protein Sec61 subunit alpha isoform 1	SEC61A1	1.15838e+07
Annexin A7	ANXA7	7940900			UDP-glucose:glycoprotein glucosyltransferase 1	UGGT1	11549000
Caveolin-1	CAV1	7.92667e+06			GTPase KRas;GTPase KRas, N-terminally processed;GTPase HRas;GTPase HRas, N-terminally processed;GTPase NRas	KRAS;HRAS;NRAS	1.1548e+07
Noggin	NOG	7904400			Atlastin-3	ATL3	1.15408e+07
Ubiquitin carboxyl-terminal hydrolase 14	USP14	7.89623e+06			Quinone oxidoreductase PIG3	TP53I3	1.15001e+07
CD44 antigen	CD44	7.83997e+06					11489600
Tubulin beta-3 chain	TUBB3	7.82807e+06			Leukotriene A-4 hydrolase	LTA4H	1.14742e+07
Ubiquilin-1	UBQLN1	7.81617e+06			Prenylated Rab acceptor protein 1	RABAC1	1.14738e+07
GDP-fucose protein O-fucosyltransferase 2	POFUT2	7.80467e+06			Chloride intracellular channel protein 3	CLIC3	11453100
Prenylated Rab acceptor protein 1	RABAC1	7771000			Thioredoxin-like protein 1	TXNL1	1.14332e+07
Glucosamine 6-phosphate N-acetyltransferase	GNPNAT1	7770400			Myristoylated alanine-rich C-kinase substrate	MARCKS	1.14309e+07
Ras-related protein Rab-18	RAB18	7.76417e+06			C-type lectin domain family 11 member A	CLEC11A	11399800
Eukaryotic translation initiation factor 1A, Y-chromosomal	EIF1AY	7.76063e+06			Protein RER1	RER1	1.12453e+07
C-type mannose receptor 2	MRC2	7740400			Copine-1	CPNE1	1.1163e+07
Aldehyde dehydrogenase, mitochondrial	ALDH2	7.72643e+06			Pyridoxal-dependent decarboxylase domain-containing protein 1	PDXDC1	1.11469e+07
Aldose reductase	AKR1B1	7.72287e+06			ATP synthase F(0) complex subunit B1, mitochondrial	ATP5F1	1.11424e+07
Delta(3,5)-Delta(2,4)-dienoyl-CoA isomerase, mitochondrial	ECH1	7.70423e+06			Bone sialoprotein 2	IBSP	1.11186e+07
Single-stranded DNA-binding protein, mitochondrial	SSBP1	7681200			Oligoribonuclease, mitochondrial	REXO2	1.11136e+07
Guanine nucleotide-binding protein G(I)/G(S)/G(O) subunit gamma-2	GNG2	7.67943e+06			Syntenin-1	SDCBP	11110300
Argininosuccinate synthase	ASS1	7.66863e+06			Cold-inducible RNA-binding protein	CIRBP	1.11085e+07
Atlastin-3	ATL3	7.65037e+06			Aminopeptidase B	RNPEP	1.10981e+07
Glyoxylate reductase/hydroxypyruvate reductase	GRHPR	7.65033e+06			Omega-amidase NIT2	NIT2	1.10969e+07
Hydroxyacyl-coenzyme A dehydrogenase, mitochondrial	HADH	7642300			Putative uncharacterized protein C5orf58	C5orf58	1.10874e+07
Eukaryotic translation initiation factor 3 subunit F	EIF3F	7640500			U6 snRNA-associated Sm-like protein LSm1	LSM1	11055700
Protein Niban	FAM129A	7.63103e+06			Spectrin alpha chain, non-erythrocytic 1	SPTAN1	1.10342e+07
ATP-dependent 6-phosphofructokinase, liver type	PFKL	7590900			Collagen triple helix repeat-containing protein 1	CTHRC1	1.10192e+07
RNA-binding protein 3	RBM3	7590800			Dihydrolipoyllysine-residue succinyltransferase component of 2-oxoglutarate dehydrogenase complex, mitochondrial	DLST	11006000
Serine/arginine-rich splicing factor 7	SRSF7	7.59017e+06			Inhibitor of nuclear factor kappa-B kinase-interacting protein	IKBIP	1.10021e+07
Aconitate hydratase, mitochondrial	ACO2	7.58453e+06			Synaptic vesicle membrane protein VAT-1 homolog	VAT1	1.09383e+07
Oligoribonuclease, mitochondrial	REXO2	7.51037e+06			Phosphoglucomutase-2	PGM2	1.09206e+07
Ubiquitin carboxyl-terminal hydrolase 5	USP5	7489400			Acid ceramidase;Acid ceramidase subunit alpha;Acid ceramidase subunit beta	ASAH1	10887800
Isocitrate dehydrogenase [NADP], mitochondrial	IDH2	7476000			Isoamyl acetate-hydrolyzing esterase 1 homolog	IAH1	1.07994e+07
Putative phospholipase B-like 2;Putative phospholipase B-like 2 32 kDa form;Putative phospholipase B-like 2 45 kDa form	PLBD2	7475900			14-3-3 protein sigma	SFN	1.07967e+07
Netrin receptor UNC5B	UNC5B	7.46847e+06			Dipeptidyl peptidase 2	DPP7	1.07782e+07
Integrin beta-1	ITGB1	7.46317e+06			Melanotransferrin	MFI2	1.07275e+07
Dipeptidyl peptidase 2	DPP7	7457600			Elongation factor Ts, mitochondrial	TSFM	10708300
Eukaryotic peptide chain release factor subunit 1	ETF1	7.45457e+06			2,4-dienoyl-CoA reductase, mitochondrial	DECR1	10700700
TAR DNA-binding protein 43	TARDBP	7.41133e+06			Nodal modulator 1	NOMO1	1.06888e+07
Lysine--tRNA ligase	KARS	7.39397e+06			BAG family molecular chaperone regulator 3	BAG3	1.0687e+07
Metallothionein-1F	MT1F	7363500			Histidine triad nucleotide-binding protein 2, mitochondrial	HINT2	1.06798e+07
Lysosome-associated membrane glycoprotein 1	LAMP1	7.36163e+06			Adipocyte plasma membrane-associated protein	APMAP	1.06476e+07
Dolichyl-diphosphooligosaccharide--protein glycosyltransferase subunit STT3A	STT3A	7.33663e+06			Xaa-Pro aminopeptidase 1	XPNPEP1	10630800
Isoamyl acetate-hydrolyzing esterase 1 homolog	IAH1	7.31537e+06			Glutathione S-transferase Mu 3	GSTM3	10630400
Far upstream element-binding protein 1	FUBP1	7303600			Tax1-binding protein 3	TAX1BP3	10599300
Lamin-B1	LMNB1	7301300			Lysine--tRNA ligase	KARS	1.0583e+07
40S ribosomal protein S27	RPS27	7295900			Malignant T-cell-amplified sequence 1	MCTS1	10551300
Protein enabled homolog	ENAH	7.29507e+06			Alpha-N-acetylglucosaminidase;Alpha-N-acetylglucosaminidase 82 kDa form;Alpha-N-acetylglucosaminidase 77 kDa form	NAGLU	10543500
Four and a half LIM domains protein 1	FHL1	7.29123e+06			Sushi repeat-containing protein SRPX	SRPX	10536100
Ribulose-phosphate 3-epimerase	RPE	7.26167e+06			Signal recognition particle 14 kDa protein	SRP14	1.05359e+07
Nuclear receptor-binding protein	NRBP1	7.25573e+06			Secretory carrier-associated membrane protein 3	SCAMP3	10516800
Fibulin-1	FBLN1	7.23817e+06			Synaptonemal complex protein SC65	LEPREL4	1.05135e+07
Transmembrane emp24 domain-containing protein 2	TMED2	7226700			Chromobox protein homolog 3	CBX3	10508500
Heat shock factor-binding protein 1	HSBP1	7217100			Inosine-5-monophosphate dehydrogenase 1	IMPDH1	1.05048e+07
U6 snRNA-associated Sm-like protein LSm1	LSM1	7.20577e+06			Large neutral amino acids transporter small subunit 1	SLC7A5	10501200
Eukaryotic translation initiation factor 3 subunit B	EIF3B	7197700			Mitochondrial import receptor subunit TOM6 homolog	TOMM6	1.04744e+07
Guanine nucleotide-binding protein subunit beta-4	GNB4	7.19557e+06			Tubulin beta-3 chain	TUBB3	10458600
Cytochrome c oxidase subunit 5B, mitochondrial	COX5B	7.17223e+06			Transforming growth factor-beta-induced protein ig-h3	TGFBI	1.04538e+07
Alpha-parvin	PARVA	7.15857e+06			Eukaryotic translation initiation factor 3 subunit L	EIF3L	10432200
Splicing factor U2AF 65 kDa subunit	U2AF2	7137500			Heat shock factor-binding protein 1	HSBP1	1.04055e+07
Protein NDRG1	NDRG1	7120200			Collagen alpha-1(IX) chain	COL9A1	1.03805e+07
60S ribosomal protein L35a	RPL35A	7.11987e+06			Small nuclear ribonucleoprotein E	SNRPE	1.03666e+07
Nodal modulator 1	NOMO1	7.10057e+06			Src substrate cortactin	CTTN	1.03028e+07
Twinfilin-2	TWF2	7.08643e+06			Protein canopy homolog 4	CNPY4	1.0297e+07
N-acetylglucosamine-6-sulfatase	GNS	7060400			Protein phosphatase 1 regulatory subunit 7	PPP1R7	10254300
Small acidic protein	SMAP	7.04053e+06			Clathrin light chain B	CLTB	10245300
Ubiquitin carboxyl-terminal hydrolase isozyme L1	UCHL1	7039400			Trifunctional enzyme subunit beta, mitochondrial;3-ketoacyl-CoA thiolase	HADHB	10191200
Cytochrome b-c1 complex subunit 7	UQCRB	7.03637e+06			3(2),5-bisphosphate nucleotidase 1	BPNT1	10185300
Lysosomal Pro-X carboxypeptidase	PRCP	7.02967e+06			Adipocyte enhancer-binding protein 1	AEBP1	10181900
Protein arginine N-methyltransferase 1	PRMT1	7.02877e+06			Protein LYRIC	MTDH	1.00992e+07
Neutral amino acid transporter A	SLC1A4	6997100			Citrate synthase, mitochondrial	CS	1.00958e+07
Guanine nucleotide-binding protein G(s) subunit alpha isoforms short;Guanine nucleotide-binding protein G(s) subunit alpha isoforms XLas	GNAS	6.98293e+06			Vacuolar protein sorting-associated protein 35	VPS35	1.00952e+07
Beta-hexosaminidase subunit alpha	HEXA	6.96957e+06			ATPase ASNA1	ASNA1	1.00725e+07
Protein-lysine 6-oxidase	LOX	6.95753e+06			NAD(P)H-hydrate epimerase	APOA1BP	1.00614e+07
60S ribosomal protein L28	RPL28	6957000			Vacuolar protein sorting-associated protein VTA1 homolog	VTA1	1.00324e+07
V-type proton ATPase subunit B, brain isoform	ATP6V1B2	6.95323e+06			Tricarboxylate transport protein, mitochondrial	SLC25A1	10011800
Signal peptidase complex subunit 1	SPCS1	6.94423e+06			Integrin beta-1	ITGB1	9.97917e+06
Leukotriene A-4 hydrolase	LTA4H	6920900			Heme-binding protein 1	HEBP1	9.97857e+06
PDZ and LIM domain protein 5	PDLIM5	6.91483e+06			Monocarboxylate transporter 1	SLC16A1	9.97763e+06
Vacuolar protein sorting-associated protein VTA1 homolog	VTA1	6.85973e+06			U6 snRNA-associated Sm-like protein LSm7	LSM7	9974000
NHP2-like protein 1;NHP2-like protein 1, N-terminally processed	NHP2L1	6.84923e+06			Histone H1.5	HIST1H1B	9.97167e+06
Aminopeptidase B	RNPEP	6.84743e+06			Mitochondrial import receptor subunit TOM22 homolog	TOMM22	9955700
Fumarate hydratase, mitochondrial	FH	6835400			Small acidic protein	SMAP	9.92337e+06
Monocarboxylate transporter 1	SLC16A1	6.82253e+06			Puromycin-sensitive aminopeptidase	NPEPPS	9903500
Phosphoenolpyruvate carboxykinase [GTP], mitochondrial	PCK2	6.82103e+06			Calcyphosin	CAPS	9.88897e+06
Fumarylacetoacetase	FAH	6.81493e+06			Ubiquilin-1	UBQLN1	9.84643e+06
U6 snRNA-associated Sm-like protein LSm3	LSM3	6809600			60S ribosomal protein L35a	RPL35A	9822600
Peroxisomal multifunctional enzyme type 2;(3R)-hydroxyacyl-CoA dehydrogenase;Enoyl-CoA hydratase 2	HSD17B4	6.78923e+06			Fumarate hydratase, mitochondrial	FH	9.77473e+06
Cytochrome c oxidase subunit 6B1	COX6B1	6.78427e+06			Prolyl 3-hydroxylase 2	LEPREL1	9.74917e+06
Vacuolar protein sorting-associated protein 35	VPS35	6.77227e+06			40S ribosomal protein S27	RPS27	9.74533e+06
Lamin-B2	LMNB2	6764800			Suppressor of G2 allele of SKP1 homolog	SUGT1	9745000
Trifunctional enzyme subunit alpha, mitochondrial;Long-chain enoyl-CoA hydratase;Long chain 3-hydroxyacyl-CoA dehydrogenase	HADHA	6746000			Septin-9	SEPT9	9.73943e+06
Signal peptidase complex subunit 3	SPCS3	6.73817e+06			60S ribosomal protein L36a-like;60S ribosomal protein L36a	RPL36AL;RPL36A	9.72737e+06
SEC23-interacting protein	SEC23IP	6.72497e+06			Transient receptor potential cation channel subfamily V member 4	TRPV4	9720800
Histidine--tRNA ligase, cytoplasmic	HARS	6674100			Peroxisomal acyl-coenzyme A oxidase 1	ACOX1	9.70113e+06
Receptor expression-enhancing protein 5	REEP5	6.63843e+06			Eukaryotic translation initiation factor 3 subunit C;Eukaryotic translation initiation factor 3 subunit C-like protein	EIF3C;EIF3CL	9.67877e+06
Heterogeneous nuclear ribonucleoprotein D-like	HNRNPDL	6.62647e+06			Lysosome membrane protein 2	SCARB2	9.63747e+06
ATP synthase subunit g, mitochondrial	ATP5L	6.62477e+06			Membrane-associated progesterone receptor component 1	PGRMC1	9.59687e+06
cAMP-dependent protein kinase type I-alpha regulatory subunit;cAMP-dependent protein kinase type I-alpha regulatory subunit, N-terminally processed	PRKAR1A	6.60603e+06			Transmembrane 9 superfamily member 2	TM9SF2	9545000
Enolase-phosphatase E1	ENOPH1	6.57827e+06			Tumor protein D53	TPD52L1	9.53973e+06
ATPase ASNA1	ASNA1	6.57613e+06			Signal peptidase complex subunit 3	SPCS3	9529300
FAST kinase domain-containing protein 5	FASTKD5	6.57537e+06			Lysyl oxidase homolog 2	LOXL2	9.50327e+06
Proteasome activator complex subunit 2	PSME2	6.54873e+06			Peptidyl-tRNA hydrolase 2, mitochondrial	PTRH2	9490200
Adipocyte plasma membrane-associated protein	APMAP	6.54263e+06			Radixin	RDX	9469500
Nexilin	NEXN	6.52247e+06			Beta-2-microglobulin;Beta-2-microglobulin form pI 5.3	B2M	9.45547e+06
Phosphomannomutase 2	PMM2	6.51633e+06			Transformer-2 protein homolog beta	TRA2B	9.42827e+06
ATP-dependent RNA helicase DDX3X	DDX3X	6.48723e+06			Dolichyl-diphosphooligosaccharide--protein glycosyltransferase subunit STT3A	STT3A	9.38953e+06
Mitochondrial 10-formyltetrahydrofolate dehydrogenase	ALDH1L2	6481400			U1 small nuclear ribonucleoprotein A	SNRPA	9375100
Vacuolar protein sorting-associated protein 29	VPS29	6.46453e+06			Protein arginine N-methyltransferase 5;Protein arginine N-methyltransferase 5, N-terminally processed	PRMT5	9373300
Elongation factor Ts, mitochondrial	TSFM	6446600			Protein NipSnap homolog 3A	NIPSNAP3A	9.37197e+06
Xaa-Pro aminopeptidase 1	XPNPEP1	6437000			Small glutamine-rich tetratricopeptide repeat-containing protein alpha	SGTA	9.37097e+06
WD repeat-containing protein 61;WD repeat-containing protein 61, N-terminally processed	WDR61	6.43657e+06			Tumor necrosis factor alpha-induced protein 8-like protein 3	TNFAIP8L3	9.37013e+06
Splicing factor, proline- and glutamine-rich	SFPQ	6.43453e+06			Protein arginine N-methyltransferase 1	PRMT1	9356600
ATP synthase subunit f, mitochondrial	ATP5J2	6.42653e+06			Lysosome-associated membrane glycoprotein 2	LAMP2	9.30247e+06
U6 snRNA-associated Sm-like protein LSm7	LSM7	6.42177e+06			V-type proton ATPase subunit d 1	ATP6V0D1	9.28513e+06
Dihydrolipoyl dehydrogenase, mitochondrial	DLD	6380000			Coronin-1B	CORO1B	9275000
KH domain-containing, RNA-binding, signal transduction-associated protein 1	KHDRBS1	6.35113e+06			Adipogenesis regulatory factor	ADIRF	9243800
Alpha-2-macroglobulin receptor-associated protein	LRPAP1	6.34513e+06			Protein-lysine 6-oxidase	LOX	9.23727e+06
Eukaryotic translation initiation factor 3 subunit L	EIF3L	6.31593e+06			Cell growth regulator with EF hand domain protein 1	CGREF1	9.22673e+06
PERQ amino acid-rich with GYF domain-containing protein 2	GIGYF2	6.30567e+06			Cysteine--tRNA ligase, cytoplasmic	CARS	9.19063e+06
PRA1 family protein 2	PRAF2	6.29557e+06			Cytoplasmic dynein 1 intermediate chain 2	DYNC1I2	9.16753e+06
Prenylcysteine oxidase 1	PCYOX1	6.28667e+06			Ras GTPase-activating protein-binding protein 1	G3BP1	9.15847e+06
V-type proton ATPase catalytic subunit A	ATP6V1A	6.27603e+06			ATP-dependent 6-phosphofructokinase, platelet type	PFKP	9.13013e+06
Mitogen-activated protein kinase 1	MAPK1	6.24913e+06			Coiled-coil-helix-coiled-coil-helix domain-containing protein 2;Putative coiled-coil-helix-coiled-coil-helix domain-containing protein CHCHD2P9, mitochondrial	CHCHD2;CHCHD2P9	9115200
Interleukin-17B	IL17B	6239000			Matrin-3	MATR3	9087700
Putative uncharacterized protein C5orf58	C5orf58	6.21753e+06			Glutathione synthetase	GSS	9.07837e+06
Lysosomal protective protein;Lysosomal protective protein 32 kDa chain;Lysosomal protective protein 20 kDa chain	CTSA	6.19373e+06			Heterogeneous nuclear ribonucleoprotein U-like protein 2	HNRNPUL2	9.06673e+06
Dynein light chain Tctex-type 1	DYNLT1	6.19117e+06			Cytochrome b-c1 complex subunit Rieske, mitochondrial;Cytochrome b-c1 complex subunit 11;Putative cytochrome b-c1 complex subunit Rieske-like protein 1	UQCRFS1;UQCRFS1P1	9.04673e+06
15 kDa selenoprotein	SEPT15	6.17937e+06			Phenylalanine--tRNA ligase alpha subunit	FARSA	9.04017e+06
GSK3-beta interaction protein	GSKIP	6164400			Eukaryotic translation initiation factor 3 subunit E	EIF3E	9.03787e+06
Copine-3	CPNE3	6158900			ATP-dependent RNA helicase DDX3X	DDX3X	9.02937e+06
Protein Dr1	DR1	6.13307e+06			F-box only protein 2	FBXO2	9.01993e+06
Protein arginine N-methyltransferase 5;Protein arginine N-methyltransferase 5, N-terminally processed	PRMT5	6.11753e+06			Enolase-phosphatase E1	ENOPH1	9019500
Phosphate carrier protein, mitochondrial	SLC25A3	6084500			Pre-mRNA-processing factor 19	PRPF19	9.00187e+06
Heme-binding protein 1	HEBP1	6074800			Protein CDV3 homolog	CDV3	8.97313e+06
Septin-9	SEPT9	6065400			60 kDa SS-A/Ro ribonucleoprotein	TROVE2	8.96777e+06
GTP-binding protein SAR1b	SAR1B	6.06473e+06			Methionine--tRNA ligase, cytoplasmic	MARS	8.95993e+06
Adenylate kinase 2, mitochondrial;Adenylate kinase 2, mitochondrial, N-terminally processed	AK2	6.05217e+06			Beta-hexosaminidase subunit alpha	HEXA	8.95083e+06
Inosine-5-monophosphate dehydrogenase 1	IMPDH1	6049300			Aspartate aminotransferase, mitochondrial	GOT2	8.93273e+06
Syntenin-1	SDCBP	6042800			Serine/arginine-rich splicing factor 2;Serine/arginine-rich splicing factor 8	SRSF2;SRSF8	8908200
Tripeptidyl-peptidase 1	TPP1	6.03283e+06			Mycophenolic acid acyl-glucuronide esterase, mitochondrial	ABHD10	8.89253e+06
Translocon-associated protein subunit gamma	SSR3	6011700			Golgi phosphoprotein 3	GOLPH3	8.88477e+06
Transcriptional activator protein Pur-alpha	PURA	5993700			Ubiquitin-conjugating enzyme E2 R2	UBE2R2	8.86217e+06
Eukaryotic translation initiation factor 4E-binding protein 1	EIF4EBP1	5.98397e+06			Eukaryotic translation initiation factor 4 gamma 1	EIF4G1	8831800
Leucine-rich repeat-containing protein 47	LRRC47	5.96937e+06			Palmitoyl-protein thioesterase 1	PPT1	8.82057e+06
Phenylalanine--tRNA ligase alpha subunit	FARSA	5.96323e+06			Signal peptidase complex catalytic subunit SEC11A	SEC11A	8.80233e+06
Transcription intermediary factor 1-beta	TRIM28	5.95893e+06			ATP-dependent 6-phosphofructokinase, liver type	PFKL	8798200
U6 snRNA-associated Sm-like protein LSm8	LSM8	5.95553e+06			Microsomal glutathione S-transferase 3	MGST3	8.79517e+06
Proteasome activator complex subunit 4	PSME4	5.92863e+06			Receptor expression-enhancing protein 5	REEP5	8.75223e+06
Mitochondrial import inner membrane translocase subunit Tim9	TIMM9	5.91187e+06			Programmed cell death protein 5	PDCD5	8.75087e+06
Protein phosphatase 1 regulatory subunit 7	PPP1R7	5.90123e+06			Alpha-aminoadipic semialdehyde dehydrogenase	ALDH7A1	8.74903e+06
Asparagine synthetase [glutamine-hydrolyzing]	ASNS	5.89123e+06			Sodium-coupled neutral amino acid transporter 4	SLC38A4	8.73693e+06
Small glutamine-rich tetratricopeptide repeat-containing protein alpha	SGTA	5873800			Neutral amino acid transporter B(0)	SLC1A5	8.73527e+06
Transmembrane 9 superfamily member 2	TM9SF2	5.86673e+06			Phenylalanine--tRNA ligase beta subunit	FARSB	8.72447e+06
Phenylalanine--tRNA ligase beta subunit	FARSB	5860200			15 kDa selenoprotein	SEPT15	8.70523e+06
Malignant T-cell-amplified sequence 1	MCTS1	5843100			Hydroxymethylglutaryl-CoA synthase, cytoplasmic	HMGCS1	8681200
Heterogeneous nuclear ribonucleoprotein H3	HNRNPH3	5.83797e+06			Lon protease homolog, mitochondrial	LONP1	8.65697e+06
U2 small nuclear ribonucleoprotein A	SNRPA1	5.83077e+06			FAST kinase domain-containing protein 5	FASTKD5	8655200
Matrix-remodeling-associated protein 7	MXRA7	5.82513e+06			Dual specificity mitogen-activated protein kinase kinase 2	MAP2K2	8.64763e+06
Prefoldin subunit 2	PFDN2	5793600			Dipeptidyl peptidase 3	DPP3	8630900
Calcyphosin	CAPS	5.77993e+06			Leucine-rich repeat-containing protein 47	LRRC47	8.57653e+06
Pituitary tumor-transforming gene 1 protein-interacting protein	PTTG1IP	5.77337e+06			Transmembrane protein 165	TMEM165	8.57477e+06
Transmembrane protein 165	TMEM165	5771300			U6 snRNA-associated Sm-like protein LSm8	LSM8	8.57287e+06
Hexokinase-1	HK1	5.77017e+06			Endophilin-B1	SH3GLB1	8.54177e+06
Glutathione synthetase	GSS	5.74343e+06			Septin-5	SEPT5	8526700
Heterogeneous nuclear ribonucleoprotein M	HNRNPM	5.74297e+06			Protein NDRG1	NDRG1	8.52333e+06
Dihydrolipoyllysine-residue succinyltransferase component of 2-oxoglutarate dehydrogenase complex, mitochondrial	DLST	5.73983e+06			Adenylate kinase 4, mitochondrial	AK4	8.51163e+06
Isochorismatase domain-containing protein 2, mitochondrial	ISOC2	5.72787e+06			Serine/threonine-protein kinase 26	STK26	8.49507e+06
CD9 antigen	CD9	5.72187e+06			Obg-like ATPase 1	OLA1	8482100
60 kDa SS-A/Ro ribonucleoprotein	TROVE2	5703100			Nuclear migration protein nudC	NUDC	8.47863e+06
Leukocyte surface antigen CD47	CD47	5.69097e+06			Core-binding factor subunit beta	CBFB	8.47427e+06
Ras GTPase-activating protein-binding protein 1	G3BP1	5.67843e+06			Complement C1q tumor necrosis factor-related protein 3	C1QTNF3	8.45013e+06
Galactokinase	GALK1	5.65517e+06			Protein LBH	LBH	8.44923e+06
RNA-binding protein 7	RBM7	5.62643e+06			Platelet-activating factor acetylhydrolase IB subunit alpha	PAFAH1B1	8446500
Valine--tRNA ligase	VARS	5.62367e+06			Immediate early response 3-interacting protein 1	IER3IP1	8.42313e+06
Dynactin subunit 1	DCTN1	5611300			Pyruvate dehydrogenase E1 component subunit alpha, somatic form, mitochondrial	PDHA1	8.41993e+06
Protein CDV3 homolog	CDV3	5.58153e+06			Epiphycan	EPYC	8.41577e+06
Citrate synthase, mitochondrial	CS	5.58077e+06			Nidogen-2	NID2	8.41283e+06
Xaa-Pro dipeptidase	PEPD	5.57983e+06			Eukaryotic translation initiation factor 3 subunit A	EIF3A	8.39373e+06
Casein kinase II subunit beta	CSNK2B	5578300			EF-hand domain-containing protein D2	EFHD2	8.38473e+06
Splicing factor U2AF 35 kDa subunit	U2AF1	5.53593e+06			Voltage-dependent anion-selective channel protein 3	VDAC3	8370800
Signal recognition particle subunit SRP72	SRP72	5.51397e+06			Leucine--tRNA ligase, cytoplasmic	LARS	8344600
Eukaryotic translation initiation factor 3 subunit C;Eukaryotic translation initiation factor 3 subunit C-like protein	EIF3C;EIF3CL	5.51237e+06			Twinfilin-2	TWF2	8.31237e+06
Mannosyl-oligosaccharide glucosidase	MOGS	5503100			Putative trypsin-6;Trypsin-2;Trypsin-1;Alpha-trypsin chain 1;Alpha-trypsin chain 2	PRSS3P2;PRSS2;PRSS1	8299200
Cytoplasmic aconitate hydratase	ACO1	5.49937e+06			Zinc transporter ZIP14	SLC39A14	8.28997e+06
14-3-3 protein sigma	SFN	5486300			26S proteasome non-ATPase regulatory subunit 9	PSMD9	8.28387e+06
Adapter molecule crk	CRK	5476800			Heterogeneous nuclear ribonucleoprotein D-like	HNRNPDL	8270200
Angiopoietin-related protein 2	ANGPTL2	5.46687e+06			Adapter molecule crk	CRK	8.22847e+06
Unconventional myosin-Ic	MYO1C	5.46643e+06			Epoxide hydrolase 1	EPHX1	8.22547e+06
Putative trypsin-6;Trypsin-2;Trypsin-1;Alpha-trypsin chain 1;Alpha-trypsin chain 2	PRSS3P2;PRSS2;PRSS1	5.45447e+06			Mannosyl-oligosaccharide glucosidase	MOGS	8.19373e+06
Malectin	MLEC	5428800			Protein phosphatase methylesterase 1	PPME1	8180700
Inosine triphosphate pyrophosphatase	ITPA	5.42347e+06			COP9 signalosome complex subunit 3	COPS3	8175600
Collagen alpha-1(IX) chain	COL9A1	5.41297e+06			Ras-related protein Rab-18	RAB18	8.16563e+06
Pyridoxal-dependent decarboxylase domain-containing protein 1	PDXDC1	5.40203e+06			GDP-fucose protein O-fucosyltransferase 2	POFUT2	8.14777e+06
Collagen alpha-1(VIII) chain;Vastatin	COL8A1	5.38983e+06			EH domain-containing protein 1	EHD1	8.13743e+06
Myeloma-overexpressed gene 2 protein	MYEOV2	5359100			Kinesin-1 heavy chain	KIF5B	8.12717e+06
Dynactin subunit 3	DCTN3	5.35797e+06			Heme-binding protein 2	HEBP2	8.11267e+06
Platelet-activating factor acetylhydrolase IB subunit alpha	PAFAH1B1	5.35287e+06			Galactokinase	GALK1	8.10843e+06
Hematological and neurological expressed 1 protein;Hematological and neurological expressed 1 protein, N-terminally processed	HN1	5352400			Sodium-coupled neutral amino acid transporter 2	SLC38A2	8.09713e+06
Splicing factor 3A subunit 2	SF3A2	5.34537e+06			Serine/threonine-protein kinase OSR1	OXSR1	8085600
Radixin	RDX	5.33867e+06			C-X-C motif chemokine 14	CXCL14	8053700
Endophilin-B1	SH3GLB1	5.32167e+06			COP9 signalosome complex subunit 5	COPS5	8035000
Phospholipase D3	PLD3	5.31767e+06			TAR DNA-binding protein 43	TARDBP	8027400
Sorting nexin-3	SNX3	5.31697e+06			Casein kinase II subunit beta	CSNK2B	8.01007e+06
26S proteasome non-ATPase regulatory subunit 10	PSMD10	5.31523e+06			DDRGK domain-containing protein 1	DDRGK1	7991500
Serine/threonine-protein phosphatase 2A activator	PPP2R4	5.31497e+06			Interferon regulatory factor 6	IRF6	7.95423e+06
H/ACA ribonucleoprotein complex subunit 1	GAR1	5.31303e+06			Secernin-1	SCRN1	7.94833e+06
Trifunctional enzyme subunit beta, mitochondrial;3-ketoacyl-CoA thiolase	HADHB	5298200			ADP-ribosylation factor GTPase-activating protein 3	ARFGAP3	7915100
Charged multivesicular body protein 4b	CHMP4B	5.29257e+06			Tropomodulin-3	TMOD3	7.91257e+06
DAZ-associated protein 1	DAZAP1	5282000			Serine/arginine-rich splicing factor 7	SRSF7	7908000
Omega-amidase NIT2	NIT2	5.26193e+06			Far upstream element-binding protein 1	FUBP1	7.87673e+06
GDP-L-fucose synthase	TSTA3	5252200			Guanine nucleotide-binding protein G(I)/G(S)/G(O) subunit gamma-2	GNG2	7873600
Alpha-N-acetylglucosaminidase;Alpha-N-acetylglucosaminidase 82 kDa form;Alpha-N-acetylglucosaminidase 77 kDa form	NAGLU	5.24327e+06			Annexin A11	ANXA11	7.85043e+06
Protein YIPF5	YIPF5	5239400			Vacuolar protein sorting-associated protein 29	VPS29	7828600
26S proteasome non-ATPase regulatory subunit 9	PSMD9	5.23927e+06			Transcriptional activator protein Pur-alpha	PURA	7.82637e+06
High mobility group protein B2	HMGB2	5.23473e+06			Catenin alpha-1	CTNNA1	7.82297e+06
Cytochrome b reductase 1	CYBRD1	5.22087e+06			Sulfatase-modifying factor 2	SUMF2	7.81557e+06
39S ribosomal protein L12, mitochondrial	MRPL12	5.20917e+06			Splicing factor U2AF 65 kDa subunit	U2AF2	7.81107e+06
EH domain-containing protein 2	EHD2	5.19187e+06			Protein transport protein Sec61 subunit beta	SEC61B	7.76727e+06
Nuclear migration protein nudC	NUDC	5.18353e+06			EGF-like repeat and discoidin I-like domain-containing protein 3	EDIL3	7.75967e+06
Glutathione peroxidase 1	GPX1	5.18303e+06			Programmed cell death protein 10	PDCD10	7746400
3(2),5-bisphosphate nucleotidase 1	BPNT1	5.18243e+06			Pyruvate dehydrogenase E1 component subunit beta, mitochondrial	PDHB	7.74587e+06
60S ribosomal protein L22-like 1	RPL22L1	5180700			Leukocyte elastase inhibitor	SERPINB1	7.74527e+06
Acidic leucine-rich nuclear phosphoprotein 32 family member E	ANP32E	5178500			Prefoldin subunit 2	PFDN2	7.72443e+06
Puromycin-sensitive aminopeptidase	NPEPPS	5154700			40S ribosomal protein S27-like	RPS27L	7.72053e+06
Eukaryotic translation initiation factor 3 subunit E	EIF3E	5.15223e+06			Epididymal secretory protein E1	NPC2	7.69947e+06
Proteasome activator complex subunit 3	PSME3	5152200			ATP synthase subunit e, mitochondrial	ATP5I	7698600
Rap1 GTPase-GDP dissociation stimulator 1	RAP1GDS1	5131400			Eukaryotic translation initiation factor 4B	EIF4B	7.67243e+06
Apoptosis-associated speck-like protein containing a CARD	PYCARD	5.10377e+06			Glutaredoxin-3	GLRX3	7.65387e+06
Polyadenylate-binding protein 1;Polyadenylate-binding protein 3	PABPC1;PABPC3	5.09607e+06			Hematological and neurological expressed 1 protein;Hematological and neurological expressed 1 protein, N-terminally processed	HN1	7.61147e+06
Calcium/calmodulin-dependent protein kinase type II subunit delta	CAMK2D	5087700			Malectin	MLEC	7.58737e+06
Serine/arginine-rich splicing factor 6	SRSF6	5.07927e+06			Prenylcysteine oxidase 1	PCYOX1	7565100
Proliferating cell nuclear antigen	PCNA	5060400			Apolipoprotein L2	APOL2	7.56337e+06
COP9 signalosome complex subunit 2	COPS2	5056700			Cystatin-C	CST3	7.53243e+06
Beta-centractin	ACTR1B	5.05347e+06			Angiopoietin-related protein 2	ANGPTL2	7511400
S-methyl-5-thioadenosine phosphorylase	MTAP	5.04197e+06			Charged multivesicular body protein 4b	CHMP4B	7.49853e+06
Sulfatase-modifying factor 2	SUMF2	5.04063e+06			Protein enabled homolog	ENAH	7.49777e+06
Very long-chain specific acyl-CoA dehydrogenase, mitochondrial	ACADVL	5037000			Cellular nucleic acid-binding protein	CNBP	7.49127e+06
EF-hand domain-containing protein D2	EFHD2	5.02777e+06			KH domain-containing, RNA-binding, signal transduction-associated protein 1	KHDRBS1	7486700
Programmed cell death protein 10	PDCD10	5007000			Eukaryotic translation initiation factor 4E-binding protein 1	EIF4EBP1	7.48293e+06
Protein kinase C delta-binding protein	PRKCDBP	5.00317e+06			Eukaryotic translation initiation factor 3 subunit H	EIF3H	7480800
Tumor necrosis factor alpha-induced protein 8-like protein 3	TNFAIP8L3	5002500			Diablo homolog, mitochondrial	DIABLO	7.46777e+06
DNA damage-binding protein 1	DDB1	4.98247e+06			Glutamate dehydrogenase 1, mitochondrial;Glutamate dehydrogenase 2, mitochondrial	GLUD1;GLUD2	7.45307e+06
Thioredoxin-like protein 1	TXNL1	4.96527e+06			Long-chain-fatty-acid--CoA ligase 1	ACSL1	7.43173e+06
RWD domain-containing protein 1	RWDD1	4959000			Alpha-2-macroglobulin receptor-associated protein	LRPAP1	7.40107e+06
Transmembrane protein 109	TMEM109	4932900			Thioredoxin-related transmembrane protein 1	TMX1	7.38753e+06
Coronin-1B	CORO1B	4.90783e+06			Synaptobrevin homolog YKT6	YKT6	7352400
Sarcoplasmic/endoplasmic reticulum calcium ATPase 2	ATP2A2	4883700					7.34409e+06
Prolyl 3-hydroxylase 2	LEPREL1	4.86273e+06			Mitochondrial import inner membrane translocase subunit Tim8 A	TIMM8A	7338900
Protein NipSnap homolog 3A	NIPSNAP3A	4843700			Eukaryotic peptide chain release factor GTP-binding subunit ERF3A	GSPT1	7.33357e+06
Protein PBDC1	PBDC1	4.81247e+06			Protein PBDC1	PBDC1	7.31853e+06
Cysteine and glycine-rich protein 1	CSRP1	4.81107e+06			Filamin-C	FLNC	7318300
Eukaryotic translation initiation factor 4 gamma 1	EIF4G1	4810300			Glucose-6-phosphate 1-dehydrogenase	G6PD	7.27943e+06
Putative RNA-binding protein Luc7-like 2	LUC7L2	4.80763e+06			Mitochondrial carrier homolog 2	MTCH2	7267300
Macrophage-capping protein	CAPG	4.80643e+06			Alpha-parvin	PARVA	7.26037e+06
Importin subunit alpha-4	KPNA3	4802800			3-mercaptopyruvate sulfurtransferase	MPST	7.23787e+06
Ribosome maturation protein SBDS	SBDS	4802100			2-oxoglutarate dehydrogenase, mitochondrial	OGDH	7.23477e+06
NSFL1 cofactor p47	NSFL1C	4.79973e+06			Lamin-B2	LMNB2	7.23177e+06
MAM domain-containing protein 2	MAMDC2	4791800			Calcium-binding protein 39	CAB39	7.22923e+06
Drebrin	DBN1	4776200			Serine/threonine-protein kinase 38-like	STK38L	7225200
Nuclear pore glycoprotein p62	NUP62	4773600			Sodium/potassium-transporting ATPase subunit beta-1	ATP1B1	7.22003e+06
Emerin	EMD	4.77323e+06			Osteomodulin	OMD	7198200
Eukaryotic translation elongation factor 1 epsilon-1	EEF1E1	4.76753e+06			Catalase	CAT	7.18953e+06
Succinate dehydrogenase [ubiquinone] flavoprotein subunit, mitochondrial	SDHA	4.73113e+06			COP9 signalosome complex subunit 2	COPS2	7173300
Cysteine--tRNA ligase, cytoplasmic	CARS	4.72473e+06			Serine/threonine-protein phosphatase 2A 55 kDa regulatory subunit B alpha isoform	PPP2R2A	7171800
Thrombospondin-2	THBS2	4.72347e+06			Signal recognition particle subunit SRP72	SRP72	7.12763e+06
Transportin-1	TNPO1	4711500			AP-2 complex subunit alpha-1	AP2A1	7.08063e+06
Myosin light chain 3;Myosin light chain 1/3, skeletal muscle isoform	MYL3;MYL1	4.70803e+06			Splicing factor 3A subunit 2	SF3A2	7069300
Biliverdin reductase A	BLVRA	4.68913e+06			Secernin-2	SCRN2	7066600
Heterogeneous nuclear ribonucleoprotein R	HNRNPR	4.67003e+06			26S proteasome non-ATPase regulatory subunit 8	PSMD8	7.06163e+06
26S proteasome non-ATPase regulatory subunit 8	PSMD8	4.66513e+06			Transcription intermediary factor 1-beta	TRIM28	7.03287e+06
Mannose-1-phosphate guanyltransferase beta	GMPPB	4.65887e+06			Charged multivesicular body protein 5	CHMP5	7.01773e+06
Protein FAM98A	FAM98A	4.65387e+06			Stromal interaction molecule 1	STIM1	7.01233e+06
Cofilin-2	CFL2	4635700			Serine/threonine-protein phosphatase 2A activator	PPP2R4	6999800
Secretory carrier-associated membrane protein 3	SCAMP3	4.63293e+06					6.97818e+06
ADP-ribosylation factor GTPase-activating protein 3	ARFGAP3	4.61283e+06			Sec1 family domain-containing protein 1	SCFD1	6.97107e+06
Kinesin-1 heavy chain	KIF5B	4612400			ADP-ribosylation factor GTPase-activating protein 1	ARFGAP1	6.96347e+06
Stanniocalcin-2	STC2	4.60329e+06			Dihydropteridine reductase	QDPR	6957600
Tubulin beta-2B chain	TUBB2B	4.57947e+06			Inorganic pyrophosphatase 2, mitochondrial	PPA2	6953500
Apolipoprotein A-II;Proapolipoprotein A-II;Truncated apolipoprotein A-II	APOA2	4.55533e+06			Retina-specific copper amine oxidase	AOC2	6948200
Serine/threonine-protein phosphatase CPPED1	CPPED1	4550900			Collagen alpha-1(XIV) chain	COL14A1	6929600
Beta-mannosidase	MANBA	4.54327e+06			Serine/threonine-protein kinase PAK 2;PAK-2p27;PAK-2p34	PAK2	6.91653e+06
Cysteine-rich with EGF-like domain protein 2	CRELD2	4.54097e+06			Protein FAM98A	FAM98A	6.91503e+06
Protein canopy homolog 3	CNPY3	4.53563e+06			RWD domain-containing protein 1	RWDD1	6905500
Glycylpeptide N-tetradecanoyltransferase 1	NMT1	4.53283e+06			Microtubule-associated protein 1B;MAP1B heavy chain;MAP1 light chain LC1	MAP1B	6904500
Transmembrane emp24 domain-containing protein 3	TMED3	4527000			Translocon-associated protein subunit gamma	SSR3	6.89833e+06
Matrilysin	MMP7	4.51703e+06			Prolyl 3-hydroxylase 3	LEPREL2	6.88393e+06
Eukaryotic translation initiation factor 3 subunit A	EIF3A	4514500			Nuclear receptor-binding protein	NRBP1	6869100
Protein FAM3C	FAM3C	4503200			Transmembrane protein 109	TMEM109	6.84357e+06
Golgi apparatus protein 1	GLG1	4497400			Thy-1 membrane glycoprotein	THY1	6824300
Glutaredoxin-3	GLRX3	4495900			Ubiquitin-like-conjugating enzyme ATG3	ATG3	6809100
ATP synthase F(0) complex subunit B1, mitochondrial	ATP5F1	4.49413e+06			Splicing factor U2AF 35 kDa subunit	U2AF1	6784200
Protein phosphatase inhibitor 2;Protein phosphatase inhibitor 2-like protein 3	PPP1R2;PPP1R2P3	4481100			Guanine nucleotide-binding protein G(s) subunit alpha isoforms short;Guanine nucleotide-binding protein G(s) subunit alpha isoforms XLas	GNAS	6.78207e+06
Density-regulated protein	DENR	4478500			WW domain-binding protein 2	WBP2	6.77883e+06
		4.46837e+06			Keratin, type II cytoskeletal 2 epidermal	KRT2	6.7634e+06
ATP-dependent RNA helicase A	DHX9	4.46757e+06			Protein-glutamine gamma-glutamyltransferase 2	TGM2	6.76183e+06
3-mercaptopyruvate sulfurtransferase	MPST	4466800			Transcriptional activator protein Pur-beta	PURB	6.75187e+06
UDP-N-acetylhexosamine pyrophosphorylase;UDP-N-acetylgalactosamine pyrophosphorylase;UDP-N-acetylglucosamine pyrophosphorylase	UAP1	4.46397e+06			Procollagen C-endopeptidase enhancer 2	PCOLCE2	6749600
PTB-containing, cubilin and LRP1-interacting protein	PID1	4.45877e+06			Parathyroid hormone/parathyroid hormone-related peptide receptor	PTH1R	6748000
Adenylate kinase 4, mitochondrial	AK4	4.43893e+06			3-ketoacyl-CoA thiolase, mitochondrial	ACAA2	6740500
Far upstream element-binding protein 2	KHSRP	4.43623e+06			EH domain-containing protein 2	EHD2	6.73347e+06
2,4-dienoyl-CoA reductase, mitochondrial	DECR1	4423700			Glyoxalase domain-containing protein 4	GLOD4	6.73213e+06
LIM and senescent cell antigen-like-containing domain protein 1	LIMS1	4.40033e+06			3-ketoacyl-CoA thiolase, peroxisomal	ACAA1	6.73103e+06
Glutathione S-transferase Mu 2	GSTM2	4398400			Mitogen-activated protein kinase 1	MAPK1	6.72187e+06
Prefoldin subunit 3	VBP1	4390300			Dynactin subunit 1	DCTN1	6.71467e+06
NAD(P)H-hydrate epimerase	APOA1BP	4.38247e+06			Solute carrier family 2, facilitated glucose transporter member 1	SLC2A1	6.70937e+06
N(G),N(G)-dimethylarginine dimethylaminohydrolase 1	DDAH1	4382200			Protein canopy homolog 3	CNPY3	6.69377e+06
Katanin p60 ATPase-containing subunit A-like 2	KATNAL2	4381700			Dynein light chain Tctex-type 1	DYNLT1	6.68307e+06
2-deoxynucleoside 5-phosphate N-hydrolase 1	DNPH1	4.37763e+06			26S proteasome non-ATPase regulatory subunit 12	PSMD12	6.67297e+06
THO complex subunit 4	ALYREF	4.36667e+06			4-trimethylaminobutyraldehyde dehydrogenase	ALDH9A1	6.66083e+06
Dipeptidyl peptidase 3	DPP3	4.36047e+06			Stathmin	STMN1	6.65217e+06
DDRGK domain-containing protein 1	DDRGK1	4358700			Methylosome protein 50	WDR77	6637400
TSC22 domain family protein 1	TSC22D1	4.35683e+06			Netrin receptor UNC5B	UNC5B	6.59617e+06
Aminoacyl tRNA synthase complex-interacting multifunctional protein 2	AIMP2	4354500			Copine-3	CPNE3	6595700
Choline-phosphate cytidylyltransferase A	PCYT1A	4.35017e+06			Vesicle-fusing ATPase	NSF	6.58673e+06
Microsomal glutathione S-transferase 3	MGST3	4344000			Eukaryotic translation initiation factor 5	EIF5	6574500
Pleiotrophin	PTN	4.34247e+06			Sorting nexin-3	SNX3	6560100
Phosphatidylinositol transfer protein beta isoform	PITPNB	4341100			H/ACA ribonucleoprotein complex subunit 1	GAR1	6.54007e+06
Eukaryotic peptide chain release factor GTP-binding subunit ERF3A	GSPT1	4336800			Splicing factor, proline- and glutamine-rich	SFPQ	6.53557e+06
Methionine--tRNA ligase, cytoplasmic	MARS	4.33617e+06			Golgi apparatus protein 1	GLG1	6.51393e+06
Microtubule-associated protein 1B;MAP1B heavy chain;MAP1 light chain LC1	MAP1B	4.33493e+06			Aminoacyl tRNA synthase complex-interacting multifunctional protein 2	AIMP2	6509400
Voltage-dependent anion-selective channel protein 3	VDAC3	4328100			COP9 signalosome complex subunit 7a	COPS7A	6.50707e+06
Eukaryotic translation initiation factor 5	EIF5	4.32363e+06			RAC-alpha serine/threonine-protein kinase	AKT1	6503200
Microfibrillar-associated protein 2	MFAP2	4.31757e+06			Protein YIPF5	YIPF5	6.49733e+06
Dual specificity mitogen-activated protein kinase kinase 1	MAP2K1	4.29667e+06			cAMP-dependent protein kinase type I-alpha regulatory subunit;cAMP-dependent protein kinase type I-alpha regulatory subunit, N-terminally processed	PRKAR1A	6.48603e+06
SUMO-activating enzyme subunit 2	UBA2	4275700			Glutamine--tRNA ligase	QARS	6.48187e+06
Regulator of cell cycle RGCC	RGCC	4263300			Calpain-6	CAPN6	6.43327e+06
COP9 signalosome complex subunit 5	COPS5	4.25863e+06			Glutathione peroxidase 1	GPX1	6427800
Choline transporter-like protein 2	SLC44A2	4256900			AP-1 complex subunit beta-1	AP1B1	6.42557e+06
Thioredoxin-related transmembrane protein 1	TMX1	4.25017e+06			Proteasome activator complex subunit 2	PSME2	6.41997e+06
COP9 signalosome complex subunit 7a	COPS7A	4.24657e+06			S-methyl-5-thioadenosine phosphorylase	MTAP	6.41963e+06
ATP-binding cassette sub-family E member 1	ABCE1	4.23207e+06			Eukaryotic translation elongation factor 1 epsilon-1	EEF1E1	6.41523e+06
Ras-related protein Rab-10	RAB10	4.23197e+06			Phospholysine phosphohistidine inorganic pyrophosphate phosphatase	LHPP	6403000
Calpain-6	CAPN6	4228500			V-type proton ATPase subunit F	ATP6V1F	6399100
Protein LZIC	LZIC	4226600			Myeloma-overexpressed gene 2 protein	MYEOV2	6.38727e+06
Charged multivesicular body protein 5	CHMP5	4.19927e+06			Ubiquitin-like modifier-activating enzyme 5	UBA5	6.37667e+06
Golgi-associated PDZ and coiled-coil motif-containing protein	GOPC	4.19007e+06			Ras-related protein Rab-10	RAB10	6.36237e+06
Melanoma-associated antigen D2	MAGED2	4.18993e+06			AP-3 complex subunit mu-1	AP3M1	6.33703e+06
IST1 homolog	IST1	4.18923e+06			Glutathione S-transferase theta-2B;Glutathione S-transferase theta-2	GSTT2B;GSTT2	6325900
Acid ceramidase;Acid ceramidase subunit alpha;Acid ceramidase subunit beta	ASAH1	4.18683e+06			MICOS complex subunit MIC60	IMMT	6.31923e+06
Golgi phosphoprotein 3	GOLPH3	4.18593e+06			Acyl-protein thioesterase 2	LYPLA2	6.31703e+06
Heterogeneous nuclear ribonucleoprotein U-like protein 1	HNRNPUL1	4180100			NSFL1 cofactor p47	NSFL1C	6313300
AP-2 complex subunit alpha-1	AP2A1	4.16803e+06			CAAX prenyl protease 1 homolog	ZMPSTE24	6306700
Mitochondrial import receptor subunit TOM6 homolog	TOMM6	4.15207e+06			Prefoldin subunit 3	VBP1	6.30667e+06
COP9 signalosome complex subunit 3	COPS3	4145800			Aldehyde dehydrogenase X, mitochondrial	ALDH1B1	6.30287e+06
Guanidinoacetate N-methyltransferase	GAMT	4140500			Integrin alpha-5;Integrin alpha-5 heavy chain;Integrin alpha-5 light chain	ITGA5	6.29057e+06
Glia maturation factor beta	GMFB	4.13573e+06			Tropomyosin alpha-1 chain	TPM1	6.26683e+06
Myc box-dependent-interacting protein 1	BIN1	4.13517e+06			Sarcoplasmic/endoplasmic reticulum calcium ATPase 2	ATP2A2	6256100
Mycophenolic acid acyl-glucuronide esterase, mitochondrial	ABHD10	4.11907e+06			Mitochondrial import inner membrane translocase subunit Tim13	TIMM13	6.21993e+06
Glutathione S-transferase theta-2B;Glutathione S-transferase theta-2	GSTT2B;GSTT2	4.10607e+06			Uncharacterized protein C1orf198	C1orf198	6.21213e+06
26S proteasome non-ATPase regulatory subunit 12	PSMD12	4.10543e+06			Glutaminase kidney isoform, mitochondrial	GLS	6.21113e+06
Proteasome activator complex subunit 1	PSME1	4102400			Actin-related protein 2/3 complex subunit 1A	ARPC1A	6.20983e+06
Mitotic checkpoint protein BUB3	BUB3	4.09863e+06			ATP-binding cassette sub-family E member 1	ABCE1	6.18673e+06
Dual specificity mitogen-activated protein kinase kinase 2	MAP2K2	4095100			Non-specific lipid-transfer protein	SCP2	6180300
ADP-ribosylation factor GTPase-activating protein 1	ARFGAP1	4.08153e+06			Transportin-1	TNPO1	6174200
Prefoldin subunit 1	PFDN1	4.07783e+06			Cytochrome c1, heme protein, mitochondrial	CYC1	6154200
Dihydropteridine reductase	QDPR	4.07703e+06			RNA-binding protein 8A	RBM8A	6148400
Leukocyte elastase inhibitor	SERPINB1	4.06173e+06			Mitotic spindle-associated MMXD complex subunit MIP18	FAM96B	6144100
Transcription initiation factor IIA subunit 1;Transcription initiation factor IIA alpha chain;Transcription initiation factor IIA beta chain	GTF2A1	4.06007e+06			PDZ domain-containing protein GIPC1	GIPC1	6.13967e+06
H/ACA ribonucleoprotein complex subunit 2	NHP2	4.05593e+06			Selenium-binding protein 1	SELENBP1	6.11123e+06
Serine/threonine-protein kinase OSR1	OXSR1	4039800			Importin-5	IPO5	6.10223e+06
Peptidyl-tRNA hydrolase 2, mitochondrial	PTRH2	4030400			Activator of 90 kDa heat shock protein ATPase homolog 1	AHSA1	6.09687e+06
Tumor protein D52	TPD52	4.02383e+06			H/ACA ribonucleoprotein complex subunit 2	NHP2	6090500
NADH dehydrogenase [ubiquinone] 1 alpha subcomplex subunit 13	NDUFA13	4.01953e+06			7-dehydrocholesterol reductase	DHCR7	6.08157e+06
Importin-5	IPO5	4.01543e+06			Rap1 GTPase-GDP dissociation stimulator 1	RAP1GDS1	6.07513e+06
Cellular nucleic acid-binding protein	CNBP	4013800			Matrix-remodeling-associated protein 7	MXRA7	6.05713e+06
Uroporphyrinogen decarboxylase	UROD	4.00947e+06			Insulin-like growth factor-binding protein 7	IGFBP7	6.05097e+06
Mitotic spindle-associated MMXD complex subunit MIP18	FAM96B	4006000			Beta-mannosidase	MANBA	6.04047e+06
4-trimethylaminobutyraldehyde dehydrogenase	ALDH9A1	4.00307e+06			Spectrin beta chain, non-erythrocytic 1	SPTBN1	6.01787e+06
Glutamate dehydrogenase 1, mitochondrial;Glutamate dehydrogenase 2, mitochondrial	GLUD1;GLUD2	4.00037e+06			Carbohydrate sulfotransferase 3	CHST3	6014200
Protein phosphatase methylesterase 1	PPME1	3992000			Protein LZIC	LZIC	6.00933e+06
Vesicle-fusing ATPase	NSF	3.98573e+06			Diphosphomevalonate decarboxylase	MVD	6.00013e+06
Clathrin light chain B	CLTB	3.97743e+06			Catenin delta-1	CTNND1	5.95407e+06
Serine/threonine-protein phosphatase 2A 55 kDa regulatory subunit B alpha isoform	PPP2R2A	3.97223e+06			Very-long-chain 3-oxoacyl-CoA reductase	HSD17B12	5939800
Serine/threonine-protein kinase PAK 2;PAK-2p27;PAK-2p34	PAK2	3.96153e+06			Ragulator complex protein LAMTOR1	LAMTOR1	5926100
Protein mago nashi homolog 2	MAGOHB	3.96093e+06			Inositol monophosphatase 3	IMPAD1	5.90857e+06
Inositol monophosphatase 3	IMPAD1	3.95137e+06			Cofilin-2	CFL2	5.90193e+06
Tripeptidyl-peptidase 2	TPP2	3949200			Choline-phosphate cytidylyltransferase A	PCYT1A	5.89157e+06
Nuclear protein localization protein 4 homolog	NPLOC4	3.94817e+06			Ras-associated and pleckstrin homology domains-containing protein 1	RAPH1	5.87843e+06
Bis(5-nucleosyl)-tetraphosphatase [asymmetrical]	NUDT2	3.94563e+06			Proteasomal ubiquitin receptor ADRM1	ADRM1	5.87027e+06
Aldose 1-epimerase	GALM	3.94467e+06			PDZ and LIM domain protein 5	PDLIM5	5860100
V-type proton ATPase subunit d 1	ATP6V0D1	3.93897e+06			Biliverdin reductase A	BLVRA	5.80637e+06
Eukaryotic translation initiation factor 3 subunit H	EIF3H	3931800			Emerin	EMD	5.80147e+06
Pyruvate dehydrogenase E1 component subunit beta, mitochondrial	PDHB	3.92917e+06			Mitochondrial import receptor subunit TOM20 homolog	TOMM20	5.79647e+06
Chloride intracellular channel protein 3	CLIC3	3.92537e+06			Glia maturation factor beta	GMFB	5.78967e+06
Protein FAM162A	FAM162A	3.90503e+06			Pyrroline-5-carboxylate reductase 2	PYCR2	5771100
Probable glutathione peroxidase 8	GPX8	3904900			Protein Dr1	DR1	5.74283e+06
GTPase KRas;GTPase KRas, N-terminally processed;GTPase HRas;GTPase HRas, N-terminally processed;GTPase NRas	KRAS;HRAS;NRAS	3.89753e+06			Katanin p60 ATPase-containing subunit A-like 2	KATNAL2	5.73933e+06
LanC-like protein 1	LANCL1	3.89413e+06			IST1 homolog	IST1	5.72243e+06
60S ribosomal protein L36a-like;60S ribosomal protein L36a	RPL36AL;RPL36A	3.89177e+06			DAZ-associated protein 1	DAZAP1	5.70177e+06
Phosphoethanolamine/phosphocholine phosphatase	PHOSPHO1	3.88483e+06			Succinyl-CoA:3-ketoacid coenzyme A transferase 1, mitochondrial	OXCT1	5.70037e+06
Integrin alpha-5;Integrin alpha-5 heavy chain;Integrin alpha-5 light chain	ITGA5	3879500			Myosin light chain 3;Myosin light chain 1/3, skeletal muscle isoform	MYL3;MYL1	5.68497e+06
Polyadenylate-binding protein 2	PABPN1	3.87177e+06			ER lumen protein-retaining receptor 3	KDELR3	5.68483e+06
Leucine--tRNA ligase, cytoplasmic	LARS	3.87023e+06			Catenin beta-1	CTNNB1	5.67613e+06
Aspartyl/asparaginyl beta-hydroxylase	ASPH	3866700			EGF-containing fibulin-like extracellular matrix protein 2	EFEMP2	5.66354e+06
Palmitoyl-protein thioesterase 1	PPT1	3.85873e+06			Clusterin;Clusterin beta chain;Clusterin alpha chain	CLU	5637100
Catalase	CAT	3.85653e+06			Polyadenylate-binding protein 1;Polyadenylate-binding protein 3	PABPC1;PABPC3	5.63643e+06
CDK5 regulatory subunit-associated protein 3	CDK5RAP3	3.85223e+06			Transmembrane protein 33	TMEM33	5.62867e+06
Secernin-2	SCRN2	3851000			Laminin subunit gamma-1	LAMC1	5616800
Probable ATP-dependent RNA helicase DDX17	DDX17	3849200			Bis(5-nucleosyl)-tetraphosphatase [asymmetrical]	NUDT2	5.60473e+06
Histidine triad nucleotide-binding protein 2, mitochondrial	HINT2	3.84857e+06			Di-N-acetylchitobiase	CTBS	5.60457e+06
3-ketoacyl-CoA thiolase, mitochondrial	ACAA2	3.84183e+06			Density-regulated protein	DENR	5.60083e+06
Cytoplasmic dynein 1 heavy chain 1	DYNC1H1	3834100			TSC22 domain family protein 3	TSC22D3	5.57307e+06
Obg-like ATPase 1	OLA1	3827600			Pituitary tumor-transforming gene 1 protein-interacting protein	PTTG1IP	5.57103e+06
Cytochrome b-c1 complex subunit Rieske, mitochondrial;Cytochrome b-c1 complex subunit 11;Putative cytochrome b-c1 complex subunit Rieske-like protein 1	UQCRFS1;UQCRFS1P1	3.81797e+06			Choline transporter-like protein 2	SLC44A2	5.56377e+06
Lysyl oxidase homolog 3	LOXL3	3.81617e+06			NADH dehydrogenase [ubiquinone] iron-sulfur protein 3, mitochondrial	NDUFS3	5560800
Carboxypeptidase Q	CPQ	3.81387e+06			Prefoldin subunit 1	PFDN1	5.55377e+06
Selenium-binding protein 1	SELENBP1	3800900			AP-2 complex subunit sigma	AP2S1	5.55267e+06
Peptidyl-prolyl cis-trans isomerase FKBP4;Peptidyl-prolyl cis-trans isomerase FKBP4, N-terminally processed	FKBP4	3794000			Lipoma-preferred partner	LPP	5.55053e+06
Glutamine--tRNA ligase	QARS	3.78717e+06			Protein disulfide-isomerase A5	PDIA5	5.53727e+06
Splicing factor 3A subunit 3	SF3A3	3777200			Cytoplasmic aconitate hydratase	ACO1	5.52567e+06
RNA-binding protein EWS	EWSR1	3760200			Sodium/potassium-transporting ATPase subunit beta-3	ATP1B3	5523900
Legumain	LGMN	3.75777e+06			Nestin	NES	5522600
RNA-binding motif protein, X chromosome;RNA-binding motif protein, X chromosome, N-terminally processed;RNA binding motif protein, X-linked-like-1	RBMX;RBMXL1	3.75753e+06			Guanine nucleotide-binding protein subunit beta-4	GNB4	5.50823e+06
Diablo homolog, mitochondrial	DIABLO	3753800			Unconventional myosin-Ic	MYO1C	5.49227e+06
SUMO-conjugating enzyme UBC9	UBE2I	3753300			Peptidyl-prolyl cis-trans isomerase FKBP4;Peptidyl-prolyl cis-trans isomerase FKBP4, N-terminally processed	FKBP4	5.48547e+06
DnaJ homolog subfamily A member 2	DNAJA2	3.72257e+06			26S proteasome non-ATPase regulatory subunit 10	PSMD10	5.48223e+06
Growth factor receptor-bound protein 2	GRB2	3.71903e+06			Nicotinate-nucleotide pyrophosphorylase [carboxylating]	QPRT	5.47973e+06
Importin-7	IPO7	3.70533e+06			Cytoplasmic dynein 1 heavy chain 1	DYNC1H1	5461800
MOB-like protein phocein	MOB4	3684700			Mannose-1-phosphate guanyltransferase beta	GMPPB	5.45643e+06
Pyruvate dehydrogenase E1 component subunit alpha, somatic form, mitochondrial	PDHA1	3670600			Deoxycytidylate deaminase	DCTD	5.42937e+06
AP-3 complex subunit mu-1	AP3M1	3.64957e+06			Acetyl-CoA acetyltransferase, mitochondrial	ACAT1	5.42473e+06
Very-long-chain 3-oxoacyl-CoA reductase	HSD17B12	3647400			Nucleolar protein 58	NOP58	5.40837e+06
SAP domain-containing ribonucleoprotein	SARNP	3638500			Putative RNA-binding protein Luc7-like 2	LUC7L2	5406300
60S ribosomal protein L34	RPL34	3636000			Tubulin-folding cofactor B	TBCB	5.35917e+06
Cytoplasmic dynein 1 light intermediate chain 1	DYNC1LI1	3632400			E3 UFM1-protein ligase 1	UFL1	5.35323e+06
Sorting nexin-1	SNX1	3.62637e+06			UBX domain-containing protein 1	UBXN1	5.35173e+06
Epididymal secretory protein E1	NPC2	3.62143e+06			Medium-chain specific acyl-CoA dehydrogenase, mitochondrial	ACADM	5351200
Proteasome inhibitor PI31 subunit	PSMF1	3.61387e+06			Heterogeneous nuclear ribonucleoprotein M	HNRNPM	5333200
Sec1 family domain-containing protein 1	SCFD1	3.60127e+06			Basic leucine zipper and W2 domain-containing protein 1	BZW1	5332700
Non-specific lipid-transfer protein	SCP2	3.59503e+06			Importin-7	IPO7	5.32397e+06
Inorganic pyrophosphatase 2, mitochondrial	PPA2	3.59107e+06			DNA damage-binding protein 1	DDB1	5.32213e+06
Methylosome protein 50	WDR77	3.58487e+06			Transmembrane emp24 domain-containing protein 3	TMED3	5.31347e+06
Tubulin-folding cofactor B	TBCB	3.57737e+06			Probable glutathione peroxidase 8	GPX8	5307300
Proteasomal ubiquitin receptor ADRM1	ADRM1	3.55427e+06			Phospholipase D3	PLD3	5.30187e+06
Ubiquitin-associated protein 2-like	UBAP2L	3.55207e+06			Dynactin subunit 3	DCTN3	5285900
EMILIN-1	EMILIN1	3.54817e+06			SUMO-activating enzyme subunit 2	UBA2	5.27073e+06
Transcriptional activator protein Pur-beta	PURB	3.54397e+06			RNA-binding protein 7	RBM7	5.26413e+06
Coronin-1C	CORO1C	3.53747e+06			Leucine-rich PPR motif-containing protein, mitochondrial	LRPPRC	5259100
V-type proton ATPase subunit F	ATP6V1F	3.53507e+06			Sorting nexin-18	SNX18	5258300
Synaptobrevin homolog YKT6	YKT6	3531300			ADP-ribosylation factor-like protein 8B	ARL8B	5.25797e+06
Bleomycin hydrolase	BLMH	3.51913e+06			Rho-related GTP-binding protein RhoB	RHOB	5.22757e+06
Collagen alpha-2(IX) chain	COL9A2	3.50937e+06			2-oxoisovalerate dehydrogenase subunit beta, mitochondrial	BCKDHB	5.20697e+06
ADP-ribosylation factor-like protein 2-binding protein	ARL2BP	3.48267e+06			Kinesin light chain 1	KLC1	5200400
Ras-related protein Rap-1b;Ras-related protein Rap-1b-like protein	RAP1B	3.47323e+06			Signal recognition particle subunit SRP68	SRP68	5.18963e+06
Fibrillin-1	FBN1	3.46903e+06			Prostaglandin E synthase	PTGES	5.16473e+06
Methionine adenosyltransferase 2 subunit beta	MAT2B	3.46533e+06			Isocitrate dehydrogenase [NADP], mitochondrial	IDH2	5139500
Ubiquitin-like-conjugating enzyme ATG3	ATG3	3449800			Testin	TES	5.13177e+06
3-ketoacyl-CoA thiolase, peroxisomal	ACAA1	3.44507e+06			Cytochrome c oxidase copper chaperone	COX17	5.12563e+06
TSC22 domain family protein 3	TSC22D3	3.42933e+06			Ribosome biogenesis protein BRX1 homolog	BRIX1	5.11844e+06
Ribonuclease UK114	HRSP12	3.40937e+06			Ganglioside GM2 activator;Ganglioside GM2 activator isoform short	GM2A	5.05897e+06
Activator of 90 kDa heat shock protein ATPase homolog 1	AHSA1	3409200			UDP-N-acetylhexosamine pyrophosphorylase;UDP-N-acetylgalactosamine pyrophosphorylase;UDP-N-acetylglucosamine pyrophosphorylase	UAP1	5040800
Acyl-coenzyme A thioesterase 13;Acyl-coenzyme A thioesterase 13, N-terminally processed	ACOT13	3398100			CDK5 regulatory subunit-associated protein 3	CDK5RAP3	5.03953e+06
Ragulator complex protein LAMTOR1	LAMTOR1	3.39337e+06			Mitotic checkpoint protein BUB3	BUB3	5.02963e+06
Splicing factor 3B subunit 3	SF3B3	3361100			Nuclear pore glycoprotein p62	NUP62	5.02247e+06
Eukaryotic translation initiation factor 3 subunit D	EIF3D	3.35223e+06			2-deoxynucleoside 5-phosphate N-hydrolase 1	DNPH1	5015500
AP-1 complex subunit beta-1	AP1B1	3347700			Vacuolar protein-sorting-associated protein 25	VPS25	5013610
Signal recognition particle receptor subunit alpha	SRPR	3347400			Caprin-1	CAPRIN1	5.00553e+06
Keratin, type II cytoskeletal 1	KRT1	3.34343e+06			ADP-dependent glucokinase	ADPGK	4.98977e+06
Eukaryotic initiation factor 4A-III;Eukaryotic initiation factor 4A-III, N-terminally processed	EIF4A3	3.33807e+06			Protein FAM177A1	FAM177A1	4.96993e+06
Serine/arginine-rich splicing factor 9	SRSF9	3325900			Acyl-coenzyme A thioesterase 13;Acyl-coenzyme A thioesterase 13, N-terminally processed	ACOT13	4.95547e+06
Cytoplasmic dynein 1 light intermediate chain 2	DYNC1LI2	3.32263e+06			Ovarian cancer-associated gene 2 protein	OVCA2	4944500
ADP-ribosylation factor-like protein 8B	ARL8B	3312100			Cysteine-rich with EGF-like domain protein 2	CRELD2	4.92963e+06
Eukaryotic translation initiation factor 4B	EIF4B	3.30943e+06			Glycylpeptide N-tetradecanoyltransferase 1	NMT1	4.92923e+06
Nicalin	NCLN	3.30063e+06			Heterogeneous nuclear ribonucleoprotein H3	HNRNPH3	4.92917e+06
Serine/threonine-protein phosphatase 2B catalytic subunit alpha isoform	PPP3CA	3300400			Nuclear protein localization protein 4 homolog	NPLOC4	4.92093e+06
Diphosphomevalonate decarboxylase	MVD	3297400			Ribosome maturation protein SBDS	SBDS	4.91853e+06
Sorting nexin-5	SNX5	3292000			L-xylulose reductase	DCXR	4916500
Quinone oxidoreductase PIG3	TP53I3	3.28253e+06			Syntaxin-12	STX12	4.91327e+06
Vacuolar protein-sorting-associated protein 25	VPS25	3263300			Drebrin	DBN1	4906200
Very-long-chain (3R)-3-hydroxyacyl-CoA dehydratase 3	HACD3	3.25877e+06			Phosphotriesterase-related protein	PTER	4.86883e+06
Keratin, type I cytoskeletal 10	KRT10	3254400			Nucleoside diphosphate kinase 3	NME3	4.85287e+06
Synapse-associated protein 1	SYAP1	3.24327e+06			Signal peptidase complex subunit 1	SPCS1	4.84607e+06
Glyoxalase domain-containing protein 4	GLOD4	3236700			3-beta-hydroxysteroid-Delta(8),Delta(7)-isomerase	EBP	4.84567e+06
Kinectin	KTN1	3.22317e+06			Prolyl endopeptidase	PREP	4.84217e+06
Ribosyldihydronicotinamide dehydrogenase [quinone]	NQO2	3221600			Huntingtin-interacting protein K	HYPK	4.84143e+06
Cell growth regulator with EF hand domain protein 1	CGREF1	3214800			Signal recognition particle receptor subunit alpha	SRPR	4818200
Collagen alpha-1(III) chain	COL3A1	3.21387e+06			BTB/POZ domain-containing protein KCTD4	KCTD4	4.81185e+06
Heterogeneous nuclear ribonucleoprotein A0	HNRNPA0	3.20843e+06			Proteasome inhibitor PI31 subunit	PSMF1	4.81183e+06
AP-2 complex subunit sigma	AP2S1	3206300			Very-long-chain (3R)-3-hydroxyacyl-CoA dehydratase 3	HACD3	4.78527e+06
NADH-cytochrome b5 reductase 1	CYB5R1	3.20057e+06			Retinol-binding protein 4;Plasma retinol-binding protein(1-182);Plasma retinol-binding protein(1-181);Plasma retinol-binding protein(1-179);Plasma retinol-binding protein(1-176)	RBP4	4769900
Erlin-2	ERLIN2	3190200			Leucine-rich repeat-containing protein 15	LRRC15	4.76601e+06
Tumor protein D53	TPD52L1	3.18633e+06			Caveolin-1	CAV1	4.76523e+06
COMM domain-containing protein 1	COMMD1	3.18063e+06			GSK3-beta interaction protein	GSKIP	4.76447e+06
Clathrin light chain A	CLTA	3162300			Succinate dehydrogenase [ubiquinone] iron-sulfur subunit, mitochondrial	SDHB	4756300
COP9 signalosome complex subunit 7b	COPS7B	3.1382e+06			U2 small nuclear ribonucleoprotein A	SNRPA1	4.75317e+06
Sodium-coupled neutral amino acid transporter 2	SLC38A2	3.12913e+06			Ragulator complex protein LAMTOR3	LAMTOR3	4747500
Deoxycytidylate deaminase	DCTD	3116200			Neuroblastoma suppressor of tumorigenicity 1	NBL1	4747400
Ubiquitin-like modifier-activating enzyme 5	UBA5	3.09777e+06			Peptidyl-prolyl cis-trans isomerase F, mitochondrial	PPIF	4.73237e+06
Collagen alpha-1(XVI) chain	COL16A1	3090300			Heterogeneous nuclear ribonucleoprotein U-like protein 1	HNRNPUL1	4.72427e+06
2-oxoglutarate dehydrogenase, mitochondrial	OGDH	3.07943e+06			Melanoma-associated antigen D2	MAGED2	4.68713e+06
Nucleolar protein 58	NOP58	3.07777e+06			ATP-dependent RNA helicase A	DHX9	4.68257e+06
COMM domain-containing protein 3	COMMD3	3072400			Isocitrate dehydrogenase [NAD] subunit alpha, mitochondrial	IDH3A	4.66863e+06
Mitochondrial carrier homolog 2	MTCH2	3067000			N-acetylserotonin O-methyltransferase-like protein	ASMTL	4.66178e+06
Cleavage and polyadenylation specificity factor subunit 5	NUDT21	3054300			COMM domain-containing protein 3	COMMD3	4.66097e+06
Neuroblastoma suppressor of tumorigenicity 1	NBL1	3050900			rRNA 2-O-methyltransferase fibrillarin	FBL	4.65703e+06
Ras-related protein Rab-1B	RAB1B	3.03837e+06			Protein FAM162A	FAM162A	4.64233e+06
Huntingtin-interacting protein 1	HIP1	3.03427e+06			Arfaptin-1	ARFIP1	4.63273e+06
Transmembrane protein 33	TMEM33	3.03407e+06			Uroporphyrinogen decarboxylase	UROD	4.63203e+06
Cysteine and histidine-rich domain-containing protein 1	CHORDC1	3.02433e+06			UDP-glucose 4-epimerase	GALE	4.61863e+06
Acetyl-CoA acetyltransferase, mitochondrial	ACAT1	3.02367e+06			Tumor protein D52	TPD52	4613500
Caprin-1	CAPRIN1	3020200			Growth factor receptor-bound protein 2	GRB2	4608500
Microsomal glutathione S-transferase 1	MGST1	3.01973e+06			Serine/arginine-rich splicing factor 6	SRSF6	4603800
Calcium-binding protein 39	CAB39	3008200			Sorting nexin-1	SNX1	4.60363e+06
Muscleblind-like protein 1;Muscleblind-like protein 2	MBNL1;MBNL2	3.00667e+06			Tripartite motif-containing protein 47	TRIM47	4.59503e+06
Kinesin light chain 1	KLC1	3.00663e+06			Calcineurin B homologous protein 1	CHP1	4593900
Leucine-rich repeat flightless-interacting protein 1	LRRFIP1	3006500			MOB-like protein phocein	MOB4	4567800
Splicing factor 3B subunit 5	SF3B5	3.00233e+06			Deoxyribonuclease-2-alpha	DNASE2	4567000
Collagen alpha-1(X) chain	COL10A1	2999600			Heterogeneous nuclear ribonucleoprotein H2	HNRNPH2	4.56473e+06
Small glutamine-rich tetratricopeptide repeat-containing protein beta	SGTB	2.99863e+06			Heat shock protein 105 kDa	HSPH1	4549300
Protein kish-A	TMEM167A	2996400			Neutral amino acid transporter A	SLC1A4	4533000
Protein S100-A16	S100A16	2.99253e+06			Protein S100-A16	S100A16	4.50937e+06
Serine/arginine-rich splicing factor 11	SRSF11	2.99127e+06			Protein kish-A	TMEM167A	4508800
Keratin, type I cytoskeletal 9	KRT9	2980600			Cysteine and glycine-rich protein 1	CSRP1	4.50857e+06
Tricarboxylate transport protein, mitochondrial	SLC25A1	2977200			DnaJ homolog subfamily A member 2	DNAJA2	4.50037e+06
Hydroxymethylglutaryl-CoA synthase, cytoplasmic	HMGCS1	2.97483e+06			Peptidyl-prolyl cis-trans isomerase FKBP3	FKBP3	4483800
ER lumen protein-retaining receptor 3	KDELR3	2.96857e+06			FAS-associated factor 2	FAF2	4.48087e+06
Lysosome-associated membrane glycoprotein 2	LAMP2	2.96107e+06			AP-3 complex subunit sigma-1	AP3S1	4460400
Ubiquitin fusion degradation protein 1 homolog	UFD1L	2.95737e+06			Ragulator complex protein LAMTOR2	LAMTOR2	4.45953e+06
NADH dehydrogenase [ubiquinone] flavoprotein 2, mitochondrial	NDUFV2	2.95723e+06			Ribonuclease UK114	HRSP12	4458200
F-box-like/WD repeat-containing protein TBL1XR1;F-box-like/WD repeat-containing protein TBL1X;F-box-like/WD repeat-containing protein TBL1Y	TBL1XR1;TBL1X;TBL1Y	2.94447e+06			Biogenesis of lysosome-related organelles complex 1 subunit 6	BLOC1S6	4440000
Exportin-1	XPO1	2.94157e+06			Intraflagellar transport protein 25 homolog	HSPB11	4.43083e+06
Mitochondrial import inner membrane translocase subunit Tim8 A	TIMM8A	2.94107e+06			EMILIN-1	EMILIN1	4426000
NADH dehydrogenase [ubiquinone] 1 alpha subcomplex subunit 8	NDUFA8	2.94067e+06			GrpE protein homolog 1, mitochondrial	GRPEL1	4.42267e+06
Twinfilin-1	TWF1	2.93987e+06			Glucosamine-6-phosphate isomerase 2	GNPDA2	4.41587e+06
Signal recognition particle subunit SRP68	SRP68	2.93653e+06			ER membrane protein complex subunit 2	EMC2	4409000
L-xylulose reductase	DCXR	2935300			Nicalin	NCLN	4.39887e+06
Adenylosuccinate synthetase isozyme 2	ADSS	2930500			Translation initiation factor eIF-2B subunit alpha	EIF2B1	4.39213e+06
Glucose-6-phosphate 1-dehydrogenase	G6PD	2927500			ELAV-like protein 1	ELAVL1	4.39147e+06
A-kinase anchor protein 11	AKAP11	2.92707e+06			Twinfilin-1	TWF1	4.37563e+06
Integrin-linked protein kinase	ILK	2.92447e+06			Acyl-protein thioesterase 1	LYPLA1	4363400
ELAV-like protein 1	ELAVL1	2.92347e+06			Pyridoxine-5-phosphate oxidase	PNPO	4362500
Histone-binding protein RBBP7	RBBP7	2.92003e+06			Cytochrome c oxidase subunit 4 isoform 1, mitochondrial	COX4I1	4.35137e+06
cGMP-specific 3,5-cyclic phosphodiesterase	PDE5A	2.91163e+06			Calcium-binding mitochondrial carrier protein SCaMC-1	SLC25A24	4.32047e+06
Cytochrome c oxidase assembly factor 4 homolog, mitochondrial	COA4	2905940			Proteasome activator complex subunit 1	PSME1	4.31723e+06
Laminin subunit gamma-1	LAMC1	2903600			Serine/threonine-protein phosphatase 2B catalytic subunit alpha isoform	PPP3CA	4284600
Peptidyl-prolyl cis-trans isomerase FKBP14	FKBP14	2.90207e+06			Collagen alpha-1(VIII) chain;Vastatin	COL8A1	4.27867e+06
Glutaminase kidney isoform, mitochondrial	GLS	2896000			AP-2 complex subunit alpha-2	AP2A2	4.27623e+06
Pyrroline-5-carboxylate reductase 2	PYCR2	2891500			Lamin-B1	LMNB1	4.27087e+06
Eukaryotic initiation factor 4A-II;Eukaryotic initiation factor 4A-II, N-terminally processed	EIF4A2	2.88827e+06			RNA-binding motif protein, X chromosome;RNA-binding motif protein, X chromosome, N-terminally processed;RNA binding motif protein, X-linked-like-1	RBMX;RBMXL1	4270100
Apoptosis regulator BAX	BAX	2.88757e+06			Translational activator GCN1	GCN1L1	4.26353e+06
Sphingomyelin phosphodiesterase 3	SMPD3	2.88387e+06			Ubiquitin fusion degradation protein 1 homolog	UFD1L	4.26083e+06
Exportin-T	XPOT	2881400			Ubiquitin carboxyl-terminal hydrolase isozyme L5	UCHL5	4.25917e+06
Transmembrane emp24 domain-containing protein 4	TMED4	2877300			Protein phosphatase 1F	PPM1F	4252500
Non-POU domain-containing octamer-binding protein	NONO	2.86617e+06			Cytoplasmic dynein 1 light intermediate chain 1	DYNC1LI1	4247400
ADP-dependent glucokinase	ADPGK	2853700			Tubulin beta-2B chain	TUBB2B	4243800
SUMO-activating enzyme subunit 1;SUMO-activating enzyme subunit 1, N-terminally processed	SAE1	2838300			Exportin-1	XPO1	4233100
Talin-2	TLN2	2.83787e+06			Pigment epithelium-derived factor	SERPINF1	4.22841e+06
Calcyclin-binding protein	CACYBP	2.83577e+06			Ubiquitin-associated protein 2-like	UBAP2L	4.22727e+06
cAMP-regulated phosphoprotein 19	ARPP19	2833000			NADH dehydrogenase [ubiquinone] 1 alpha subcomplex subunit 8	NDUFA8	4209900
Chondroadherin-like protein	CHADL	2.83243e+06			cGMP-specific 3,5-cyclic phosphodiesterase	PDE5A	4.20743e+06
Translin-associated protein X	TSNAX	2.81427e+06			Protein phosphatase inhibitor 2;Protein phosphatase inhibitor 2-like protein 3	PPP1R2;PPP1R2P3	4.19627e+06
Mannose-1-phosphate guanyltransferase alpha	GMPPA	2813700			NEDD8-conjugating enzyme Ubc12	UBE2M	4.18727e+06
Syntaxin-7	STX7	2.81323e+06			Transcription initiation factor IIA subunit 1;Transcription initiation factor IIA alpha chain;Transcription initiation factor IIA beta chain	GTF2A1	4.18553e+06
C-Jun-amino-terminal kinase-interacting protein 4	SPAG9	2.81307e+06			60S ribosomal protein L22-like 1	RPL22L1	4.18027e+06
Actin-related protein 2/3 complex subunit 1A	ARPC1A	2.81131e+06			Peptidyl-prolyl cis-trans isomerase FKBP14	FKBP14	4.17247e+06
Ragulator complex protein LAMTOR2	LAMTOR2	2.81057e+06			Erythrocyte band 7 integral membrane protein	STOM	4166000
Collagen alpha-1(V) chain	COL5A1	2.80743e+06			Fructose-2,6-bisphosphatase TIGAR	TIGAR	4.15823e+06
Coiled-coil domain-containing protein 158	CCDC158	2.80477e+06			Splicing factor 3B subunit 5	SF3B5	4.15247e+06
Protein Hikeshi	C11orf73	2.80187e+06			Ras-related protein Rab-1B	RAB1B	4.14907e+06
Protein transport protein Sec61 subunit beta	SEC61B	2794400			Leucine-rich repeat flightless-interacting protein 1	LRRFIP1	4.14467e+06
Sorting nexin-18	SNX18	2.78293e+06			Cytochrome b5	CYB5A	4.13717e+06
V-type proton ATPase subunit E 1	ATP6V1E1	2781600			Adenylosuccinate synthetase isozyme 2	ADSS	4.11443e+06
Prolyl endopeptidase	PREP	2.77363e+06			Mitochondrial 2-oxoglutarate/malate carrier protein	SLC25A11	4092900
Vesicle-associated membrane protein-associated protein B/C	VAPB	2.77307e+06			Coronin-1C	CORO1C	4.07713e+06
Splicing factor 3A subunit 1	SF3A1	2770600			Nicotinamide phosphoribosyltransferase	NAMPT	4.07673e+06
Alpha-N-acetylgalactosaminidase	NAGA	2767200			CDGSH iron-sulfur domain-containing protein 2	CISD2	4.07311e+06
Calcium-regulated heat stable protein 1	CARHSP1	2.76297e+06			Carbonic anhydrase 2	CA2	4.06637e+06
Acylamino-acid-releasing enzyme	APEH	2739600			Mannose-1-phosphate guanyltransferase alpha	GMPPA	4054800
Heterogeneous nuclear ribonucleoprotein H2	HNRNPH2	2731400			Protein FAM3C	FAM3C	4050700
Chromobox protein homolog 1	CBX1	2.72487e+06			Ras-related protein Rab-31	RAB31	4.03893e+06
Heat shock protein 105 kDa	HSPH1	2.72353e+06			COMM domain-containing protein 1	COMMD1	4.02957e+06
m7GpppX diphosphatase	DCPS	2.71847e+06			Translin-associated protein X	TSNAX	4.02573e+06
182 kDa tankyrase-1-binding protein	TNKS1BP1	2714500			ADP/ATP translocase 2;ADP/ATP translocase 2, N-terminally processed	SLC25A5	3.99157e+06
Large neutral amino acids transporter small subunit 1	SLC7A5	2.70947e+06			Inverted formin-2	INF2	3989100
V-type proton ATPase subunit C 1	ATP6V1C1	2.69677e+06			Acidic leucine-rich nuclear phosphoprotein 32 family member E	ANP32E	3.98763e+06
ADP-ribosylation factor 5	ARF5	2.69493e+06			Osteopontin	SPP1	3.98617e+06
UBX domain-containing protein 1	UBXN1	2.68193e+06			Guanidinoacetate N-methyltransferase	GAMT	3986100
AP-3 complex subunit sigma-1	AP3S1	2673200			Clathrin interactor 1	CLINT1	3.97847e+06
CDGSH iron-sulfur domain-containing protein 2	CISD2	2669300			NAD(P) transhydrogenase, mitochondrial	NNT	3.96387e+06
Interferon-inducible double-stranded RNA-dependent protein kinase activator A	PRKRA	2668300			Kinectin	KTN1	3958800
NHL repeat-containing protein 2	NHLRC2	2.66653e+06			PDZ and LIM domain protein 1	PDLIM1	3.95763e+06
RNA-binding motif, single-stranded-interacting protein 1	RBMS1	2.66457e+06			AP-3 complex subunit delta-1	AP3D1	3.95387e+06
Prostaglandin reductase 1	PTGR1	2656390			AP-2 complex subunit mu	AP2M1	3.95147e+06
Peroxisomal acyl-coenzyme A oxidase 1	ACOX1	2.65107e+06			Importin subunit alpha-7;Importin subunit alpha-6	KPNA6;KPNA5	3.94727e+06
Protein RER1	RER1	2650900			Alpha-N-acetylgalactosaminidase	NAGA	3930100
MICOS complex subunit MIC60	IMMT	2647900			Far upstream element-binding protein 2	KHSRP	3.92107e+06
Plasminogen activator inhibitor 1	SERPINE1	2.64766e+06			Serine/threonine-protein phosphatase 6 catalytic subunit;Serine/threonine-protein phosphatase 6 catalytic subunit, N-terminally processed	PPP6C	3.90637e+06
NADH dehydrogenase [ubiquinone] iron-sulfur protein 3, mitochondrial	NDUFS3	2.64473e+06			Thrombospondin-3	THBS3	3903990
Protein YIPF2	YIPF2	2.64253e+06			Mitochondrial import inner membrane translocase subunit TIM44	TIMM44	3.89863e+06
Glutamine synthetase	GLUL	2.64167e+06			LIM and senescent cell antigen-like-containing domain protein 1	LIMS1	3.89603e+06
Cation-dependent mannose-6-phosphate receptor	M6PR	2.63363e+06			1,2-dihydroxy-3-keto-5-methylthiopentene dioxygenase	ADI1	3.89423e+06
Intraflagellar transport protein 25 homolog	HSPB11	2624100			Putative hydrolase RBBP9	RBBP9	3893200
Vacuolar protein sorting-associated protein 28 homolog	VPS28	2.62143e+06			NADH dehydrogenase [ubiquinone] 1 alpha subcomplex subunit 13	NDUFA13	3.88973e+06
Cysteine-rich protein 1	CRIP1	2.62073e+06			Bcl-2-like protein 13	BCL2L13	3.87377e+06
Cytochrome c1, heme protein, mitochondrial	CYC1	2608200			Multifunctional methyltransferase subunit TRM112-like protein	TRMT112	3872800
Isocitrate dehydrogenase [NAD] subunit alpha, mitochondrial	IDH3A	2605500			Protein Wnt-11	WNT11	3.86283e+06
FACT complex subunit SSRP1	SSRP1	2600700			Carboxypeptidase Q	CPQ	3.85987e+06
Zinc transporter ZIP14	SLC39A14	2600200			Cation-dependent mannose-6-phosphate receptor	M6PR	3.85447e+06
N-acetylserotonin O-methyltransferase-like protein	ASMTL	2.59913e+06			Monocarboxylate transporter 4	SLC16A3	3.85323e+06
Adipogenesis regulatory factor	ADIRF	2.59497e+06			NHL repeat-containing protein 2	NHLRC2	3.85107e+06
Histone-arginine methyltransferase CARM1	CARM1	2585900			Heterogeneous nuclear ribonucleoprotein R	HNRNPR	3.84043e+06
116 kDa U5 small nuclear ribonucleoprotein component	EFTUD2	2.58523e+06			Glutamate--cysteine ligase regulatory subunit	GCLM	3.83323e+06
Protein diaphanous homolog 1	DIAPH1	2.58047e+06			ADP-ribosylation factor-like protein 2-binding protein	ARL2BP	3.83023e+06
CAAX prenyl protease 1 homolog	ZMPSTE24	2.57767e+06			DnaJ homolog subfamily A member 1	DNAJA1	3830000
Ras-related protein R-Ras	RRAS	2.57413e+06			Protein mago nashi homolog 2	MAGOHB	3.82543e+06
Syntaxin-12	STX12	2.57383e+06			Apoptosis-inducing factor 1, mitochondrial	AIFM1	3.81927e+06
Microfibril-associated glycoprotein 4	MFAP4	2.56501e+06			Periostin	POSTN	3.81846e+06
Importin subunit alpha-7;Importin subunit alpha-6	KPNA6;KPNA5	2.55947e+06			THO complex subunit 4	ALYREF	3.81547e+06
Protein FAM114A2	FAM114A2	2.55883e+06			5-AMP-activated protein kinase subunit beta-2	PRKAB2	3.80473e+06
Multifunctional methyltransferase subunit TRM112-like protein	TRMT112	2558600			AP-1 complex subunit mu-1	AP1M1	3804500
UDP-glucose 4-epimerase	GALE	2.55393e+06			Calpastatin	CAST	3.79737e+06
Poly(U)-binding-splicing factor PUF60	PUF60	2.54617e+06			Glypican-1;Secreted glypican-1	GPC1	3.79627e+06
Glucosamine-6-phosphate isomerase 2	GNPDA2	2.54307e+06			TOM1-like protein 2	TOM1L2	3.78537e+06
Ubiquitin-conjugating enzyme E2 R2	UBE2R2	2.53945e+06			Splicing factor 3A subunit 3	SF3A3	3.75873e+06
Calpastatin	CAST	2.53907e+06			Extended synaptotagmin-1	ESYT1	3753200
Protein FAM177A1	FAM177A1	2.53676e+06			Sepiapterin reductase	SPR	3748600
Protein NDRG2	NDRG2	2.52903e+06			Protein kinase C delta-binding protein	PRKCDBP	3.74167e+06
Prostaglandin E synthase	PTGES	2.52427e+06			Cytoplasmic dynein 1 light intermediate chain 2	DYNC1LI2	3.74063e+06
Putative hydrolase RBBP9	RBBP9	2.52117e+06			Succinyl-CoA ligase [ADP/GDP-forming] subunit alpha, mitochondrial	SUCLG1	3.73607e+06
Coiled-coil domain-containing protein 6	CCDC6	2517600			Probable ATP-dependent RNA helicase DDX17	DDX17	3728700
ATP synthase subunit e, mitochondrial	ATP5I	2512400			Legumain	LGMN	3.72787e+06
Hydroxymethylglutaryl-CoA lyase, mitochondrial	HMGCL	2511700			C-Jun-amino-terminal kinase-interacting protein 4	SPAG9	3.72527e+06
E3 UFM1-protein ligase 1	UFL1	2.51143e+06			Protein diaphanous homolog 1	DIAPH1	3.72497e+06
Vacuolar protein sorting-associated protein 26A	VPS26A	2507700			Hydroxymethylglutaryl-CoA lyase, mitochondrial	HMGCL	3.72147e+06
TIP41-like protein	TIPRL	2.50273e+06			Fibulin-1	FBLN1	3715300
Serine/threonine-protein kinase 38-like	STK38L	2.49923e+06			Cleavage and polyadenylation specificity factor subunit 5	NUDT21	3.71367e+06
Acyl-protein thioesterase 1	LYPLA1	2498300			A-kinase anchor protein 11	AKAP11	3.71247e+06
Sodium-dependent phosphate transporter 2	SLC20A2	2.49347e+06			Indian hedgehog protein;Indian hedgehog protein N-product;Indian hedgehog protein C-product;Sonic hedgehog protein;Sonic hedgehog protein N-product;Sonic hedgehog protein C-product	IHH;SHH	3707800
Ragulator complex protein LAMTOR4;Ragulator complex protein LAMTOR4, N-terminally processed	LAMTOR4	2.49023e+06			Brain acid soluble protein 1	BASP1	3706200
AP-1 complex subunit mu-1	AP1M1	2.47923e+06			Cyclin-dependent kinase inhibitor 2A;Cyclin-dependent kinase 4 inhibitor B	CDKN2A;CDKN2B	3.69357e+06
cAMP-dependent protein kinase catalytic subunit alpha	PRKACA	2.47787e+06			Methionine aminopeptidase 2	METAP2	3.67293e+06
Retina-specific copper amine oxidase	AOC2	2477500			Calcium-regulated heat stable protein 1	CARHSP1	3660000
Gamma-glutamyl hydrolase	GGH	2464900			Metaxin-2	MTX2	3.62233e+06
Signal peptidase complex catalytic subunit SEC11A	SEC11A	2.46303e+06			Collagen alpha-2(V) chain	COL5A2	3.62113e+06
Uncharacterized protein C1orf198	C1orf198	2462360			Methionine adenosyltransferase 2 subunit beta	MAT2B	3.61157e+06
5-AMP-activated protein kinase subunit beta-2	PRKAB2	2461700			Microtubule-associated proteins 1A/1B light chain 3B;Microtubule-associated proteins 1A/1B light chain 3 beta 2;Microtubule-associated proteins 1A/1B light chain 3A	MAP1LC3B;MAP1LC3B2;MAP1LC3A	3.60493e+06
AP-2 complex subunit alpha-2	AP2A2	2.45723e+06			Protein LSM12 homolog	LSM12	3598400
Ragulator complex protein LAMTOR3	LAMTOR3	2457200			Trifunctional purine biosynthetic protein adenosine-3;Phosphoribosylamine--glycine ligase;Phosphoribosylformylglycinamidine cyclo-ligase;Phosphoribosylglycinamide formyltransferase	GART	3578200
Glucosylceramidase	GBA	2455800			Versican core protein	VCAN	3575500
U1 small nuclear ribonucleoprotein C	SNRPC	2.45163e+06			TIP41-like protein	TIPRL	3.56423e+06
Ran GTPase-activating protein 1	RANGAP1	2450900			Protein FAM114A2	FAM114A2	3.56323e+06
Clathrin interactor 1	CLINT1	2.44993e+06			Adenosine 3-phospho 5-phosphosulfate transporter 1	SLC35B2	3562200
ER membrane protein complex subunit 2	EMC2	2445800			Splicing factor 3B subunit 3	SF3B3	3.55647e+06
Translation initiation factor eIF-2B subunit alpha	EIF2B1	2441600			COMM domain-containing protein 9	COMMD9	3551700
Heterogeneous nuclear ribonucleoprotein A/B	HNRNPAB	2.42617e+06			Polyadenylate-binding protein 2	PABPN1	3.54917e+06
Golgin subfamily A member 3	GOLGA3	2.41407e+06			Exportin-T	XPOT	3.54327e+06
Pyrroline-5-carboxylate reductase 3	PYCRL	2.41343e+06			Vacuolar protein sorting-associated protein 26A	VPS26A	3.53533e+06
Adenosine 3-phospho 5-phosphosulfate transporter 1	SLC35B2	2.41227e+06			Eukaryotic initiation factor 4A-III;Eukaryotic initiation factor 4A-III, N-terminally processed	EIF4A3	3.53523e+06
Serine/arginine-rich splicing factor 10	SRSF10	2411600			Glutathione S-transferase Mu 2	GSTM2	3519290
Heterochromatin protein 1-binding protein 3	HP1BP3	2.40977e+06			LanC-like protein 1	LANCL1	3.51527e+06
RAC-alpha serine/threonine-protein kinase	AKT1	2.38706e+06			Epidermal growth factor receptor kinase substrate 8-like protein 2	EPS8L2	3.51077e+06
Plasma serine protease inhibitor	SERPINA5	2.37886e+06			NADH dehydrogenase [ubiquinone] flavoprotein 2, mitochondrial	NDUFV2	3.50977e+06
Protein transport protein Sec24C	SEC24C	2.37053e+06			Ran GTPase-activating protein 1	RANGAP1	3.50727e+06
Protein flightless-1 homolog	FLII	2361240			Cytochrome c oxidase subunit 2	MT-CO2	3.49603e+06
Secretory carrier-associated membrane protein 4	SCAMP4	2.35903e+06			SH3 domain-containing kinase-binding protein 1	SH3KBP1	3.49257e+06
Transducin beta-like protein 2	TBL2	2.35633e+06			Glutathione S-transferase kappa 1	GSTK1	3.48897e+06
Gamma-soluble NSF attachment protein	NAPG	2354200			Ragulator complex protein LAMTOR4;Ragulator complex protein LAMTOR4, N-terminally processed	LAMTOR4	3.48697e+06
Docking protein 1	DOK1	2.34967e+06			H/ACA ribonucleoprotein complex subunit 4	DKC1	3.48367e+06
Biogenesis of lysosome-related organelles complex 1 subunit 6	BLOC1S6	2349550			Glucose-induced degradation protein 8 homolog	GID8	3.47823e+06
Cytochrome c oxidase subunit 2	MT-CO2	2.34857e+06			LETM1 and EF-hand domain-containing protein 1, mitochondrial	LETM1	3475500
Serine/threonine-protein phosphatase 6 catalytic subunit;Serine/threonine-protein phosphatase 6 catalytic subunit, N-terminally processed	PPP6C	2.34654e+06			Protein transport protein Sec24A	SEC24A	3.47227e+06
Nicotinamide phosphoribosyltransferase	NAMPT	2345500			Target of Myb protein 1	TOM1	3465900
Stromal cell-derived factor 2-like protein 1	SDF2L1	2.34313e+06			Glucosamine-6-phosphate isomerase 1	GNPDA1	3.45787e+06
Monocarboxylate transporter 4	SLC16A3	2.34053e+06			Eukaryotic translation initiation factor 5B	EIF5B	3.45687e+06
FAS-associated death domain protein	FADD	2.33513e+06			Mitochondrial import receptor subunit TOM40 homolog	TOMM40	3.45533e+06
Splicing factor 3B subunit 2	SF3B2	2333900			Protein FAM188A	FAM188A	3.44717e+06
Glycogen [starch] synthase, muscle	GYS1	2.33137e+06			ADP-ribosylation factor 5	ARF5	3.43873e+06
Nucleoside diphosphate kinase 3	NME3	2331300			Sodium-dependent phosphate transporter 2	SLC20A2	3.43317e+06
Arf-GAP domain and FG repeat-containing protein 1	AGFG1	2.32797e+06			Band 4.1-like protein 2	EPB41L2	3.42887e+06
Choline transporter-like protein 1	SLC44A1	2317700			Laminin subunit alpha-4	LAMA4	3.42107e+06
Cytochrome b5	CYB5A	2.31637e+06			Collagen alpha-2(IX) chain	COL9A2	3411900
Crk-like protein	CRKL	2.31357e+06			DnaJ homolog subfamily C member 3	DNAJC3	3.41037e+06
Filamin-C	FLNC	2.31357e+06			Cold shock domain-containing protein E1	CSDE1	3.40097e+06
Dolichol-phosphate mannosyltransferase subunit 1	DPM1	2.30943e+06			Protein YIPF2	YIPF2	3392200
Cytochrome c oxidase subunit 6C	COX6C	2.30503e+06			Vacuolar protein sorting-associated protein 28 homolog	VPS28	3391300
Fructose-2,6-bisphosphatase TIGAR	TIGAR	2.30067e+06			FAS-associated death domain protein	FADD	3.38793e+06
Ras-related protein Rab-21	RAB21	2.29903e+06			V-type proton ATPase subunit E 1	ATP6V1E1	3.38753e+06
Probable ATP-dependent RNA helicase DDX6	DDX6	2.28983e+06			Microtubule-associated protein RP/EB family member 3	MAPRE3	3384500
Programmed cell death protein 4	PDCD4	2.28323e+06			Cytosolic phospholipase A2;Phospholipase A2;Lysophospholipase	PLA2G4A	3.37927e+06
RNA-binding protein 39	RBM39	2.27787e+06			Sphingomyelin phosphodiesterase 3	SMPD3	3.37874e+06
2-oxoisovalerate dehydrogenase subunit beta, mitochondrial	BCKDHB	2.27247e+06			Glycogen [starch] synthase, muscle	GYS1	3371600
NADH dehydrogenase [ubiquinone] 1 alpha subcomplex subunit 3	NDUFA3	2.27213e+06			V-type proton ATPase subunit C 1	ATP6V1C1	3367700
Unconventional myosin-Id	MYO1D	2.27137e+06			NADH dehydrogenase [ubiquinone] 1 beta subcomplex subunit 1	NDUFB1	3367500
Mitochondrial import receptor subunit TOM22 homolog	TOMM22	2269100			Granulins;Acrogranin;Paragranulin;Granulin-1;Granulin-2;Granulin-3;Granulin-4;Granulin-5;Granulin-6;Granulin-7	GRN	3.36323e+06
Casein kinase II subunit alpha;Casein kinase II subunit alpha 3	CSNK2A1;CSNK2A3	2.26253e+06			Torsin-1A-interacting protein 1	TOR1AIP1	3.36007e+06
Translational activator GCN1	GCN1L1	2.25893e+06			Secretory carrier-associated membrane protein 4	SCAMP4	3358700
AP-2 complex subunit mu	AP2M1	2257800			PTB-containing, cubilin and LRP1-interacting protein	PID1	3.34913e+06
Aldehyde dehydrogenase X, mitochondrial	ALDH1B1	2.24283e+06			CD276 antigen	CD276	3.34027e+06
Brain acid soluble protein 1	BASP1	2241260			Enoyl-CoA delta isomerase 1, mitochondrial	ECI1	3339800
Succinyl-CoA:3-ketoacid coenzyme A transferase 1, mitochondrial	OXCT1	2.23073e+06			Acylamino-acid-releasing enzyme	APEH	3.33627e+06
Thyroid receptor-interacting protein 6	TRIP6	2.22847e+06			Signal recognition particle 19 kDa protein	SRP19	3.33607e+06
Pyridoxine-5-phosphate oxidase	PNPO	2.22123e+06			Sjoegren syndrome/scleroderma autoantigen 1	SSSCA1	3.32663e+06
Trifunctional purine biosynthetic protein adenosine-3;Phosphoribosylamine--glycine ligase;Phosphoribosylformylglycinamidine cyclo-ligase;Phosphoribosylglycinamide formyltransferase	GART	2.22053e+06			Phosphoserine phosphatase	PSPH	3.31873e+06
Protein phosphatase 1F	PPM1F	2.21823e+06			Zinc finger protein 428	ZNF428	3.31573e+06
Lon protease homolog, mitochondrial	LONP1	2.21553e+06			Protein FAM49B	FAM49B	3.31433e+06
NADH dehydrogenase [ubiquinone] 1 beta subcomplex subunit 1	NDUFB1	2.21077e+06			Syntaxin-7	STX7	3.31247e+06
Synaptophysin-like protein 1	SYPL1	2209200			Rho guanine nucleotide exchange factor 1	ARHGEF1	3.29183e+06
Ester hydrolase C11orf54	C11orf54	2200300			Long-chain-fatty-acid--CoA ligase 3	ACSL3	3283100
C-terminal-binding protein 1	CTBP1	2.19597e+06			Solute carrier family 13 member 5	SLC13A5	3.28013e+06
NEDD8-conjugating enzyme Ubc12	UBE2M	2194100			Membrane magnesium transporter 1	MMGT1	3.27587e+06
Solute carrier family 2, facilitated glucose transporter member 1	SLC2A1	2189140			Splicing factor 3A subunit 1	SF3A1	3.27113e+06
Laminin subunit beta-1	LAMB1	2.18757e+06			Cysteine and histidine-rich domain-containing protein 1	CHORDC1	3268400
Tubulin--tyrosine ligase-like protein 12	TTLL12	2.18623e+06			Proteasome assembly chaperone 3	PSMG3	3.25879e+06
Fatty acid-binding protein, heart	FABP3	2.18515e+06			Fumarylacetoacetate hydrolase domain-containing protein 2A	FAHD2A	3.25577e+06
MOB kinase activator 1A	MOB1A	2.18103e+06			Phosphatidylinositol transfer protein beta isoform	PITPNB	3250300
Coiled-coil domain-containing protein 43	CCDC43	2.18057e+06			Ribosomal L1 domain-containing protein 1	RSL1D1	3.24493e+06
GrpE protein homolog 1, mitochondrial	GRPEL1	2.17827e+06			Beta-centractin	ACTR1B	3236100
Ras-associated and pleckstrin homology domains-containing protein 1	RAPH1	2.17703e+06			Protein transport protein Sec24C	SEC24C	3233600
BET1-like protein	BET1L	2.1657e+06			Coiled-coil domain-containing protein 6	CCDC6	3224500
Na(+)/H(+) exchange regulatory cofactor NHE-RF1	SLC9A3R1	2.16185e+06			Leukocyte surface antigen CD47	CD47	3.22447e+06
Acyl-protein thioesterase 2	LYPLA2	2.16177e+06			Transducin beta-like protein 2	TBL2	3.20927e+06
Apolipoprotein L2	APOL2	2.15642e+06			COP9 signalosome complex subunit 7b	COPS7B	3.20177e+06
Protein transport protein Sec24A	SEC24A	2.15117e+06			Epsin-1	EPN1	3.18953e+06
Mitochondrial import inner membrane translocase subunit Tim13	TIMM13	2.14523e+06			Endoplasmic reticulum lectin 1	ERLEC1	3184500
		2143390			Charged multivesicular body protein 2a	CHMP2A	3.17863e+06
Granulins;Acrogranin;Paragranulin;Granulin-1;Granulin-2;Granulin-3;Granulin-4;Granulin-5;Granulin-6;Granulin-7	GRN	2141500			Probable cytosolic iron-sulfur protein assembly protein CIAO1	CIAO1	3176200
T-complex protein 1 subunit zeta-2	CCT6B	2135300			C-Myc-binding protein	MYCBP	3.17347e+06
Succinate dehydrogenase [ubiquinone] iron-sulfur subunit, mitochondrial	SDHB	2125500			Lys-63-specific deubiquitinase BRCC36	BRCC3	3.17073e+06
Zinc finger protein 428	ZNF428	2.12543e+06			Ras-related protein Ral-B	RALB	3162200
Arfaptin-1	ARFIP1	2124400			Ras-related protein R-Ras	RRAS	3.14423e+06
NAD(P) transhydrogenase, mitochondrial	NNT	2122000			RNA 3-terminal phosphate cyclase	RTCA	3.14343e+06
NADH-ubiquinone oxidoreductase 75 kDa subunit, mitochondrial	NDUFS1	2111800			Tubulin--tyrosine ligase-like protein 12	TTLL12	3.14253e+06
Histone-lysine N-methyltransferase SETD7	SETD7	2.10227e+06			Ethylmalonyl-CoA decarboxylase	ECHDC1	3.13827e+06
SNARE-associated protein Snapin	SNAPIN	2.09967e+06			Casein kinase II subunit alpha;Casein kinase II subunit alpha 3	CSNK2A1;CSNK2A3	3.12603e+06
Regulator of nonsense transcripts 1	UPF1	2098100			Protein lifeguard 3	TMBIM1	3.11863e+06
Probable cytosolic iron-sulfur protein assembly protein CIAO1	CIAO1	2095400			Serine dehydratase-like	SDSL	3.11787e+06
Gap junction alpha-1 protein	GJA1	2091210			116 kDa U5 small nuclear ribonucleoprotein component	EFTUD2	3110600
Nuclear fragile X mental retardation-interacting protein 2	NUFIP2	2.08713e+06			Hippocalcin-like protein 1	HPCAL1	3.10137e+06
V-type proton ATPase subunit H	ATP6V1H	2.08657e+06			Putative adenosylhomocysteinase 2;Putative adenosylhomocysteinase 3	AHCYL1;AHCYL2	3089300
Proteolipid protein 2	PLP2	2.08117e+06			PERQ amino acid-rich with GYF domain-containing protein 2	GIGYF2	3.08657e+06
DCC-interacting protein 13-alpha	APPL1	2080400			Non-POU domain-containing octamer-binding protein	NONO	3082700
Early endosome antigen 1	EEA1	2.07187e+06			Lanosterol synthase	LSS	3081700
Protein LSM12 homolog	LSM12	2066400			Desumoylating isopeptidase 1	DESI1	3.07862e+06
Gamma-glutamylcyclotransferase	GGCT	2.06173e+06			TSC22 domain family protein 4	TSC22D4	3075100
Fibronectin type III domain-containing protein 3B	FNDC3B	2056200			Endoglin	ENG	3.07087e+06
Inverted formin-2	INF2	2.05413e+06			Vesicle transport protein GOT1B	GOLT1B	3.07003e+06
Putative peptidyl-tRNA hydrolase PTRHD1	PTRHD1	2034400			OCIA domain-containing protein 1	OCIAD1	3067200
Maturin	MTURN	2024300			RNA-binding motif, single-stranded-interacting protein 1	RBMS1	3.05997e+06
Vasodilator-stimulated phosphoprotein	VASP	2.02207e+06			Small glutamine-rich tetratricopeptide repeat-containing protein beta	SGTB	3.05347e+06
Ganglioside GM2 activator;Ganglioside GM2 activator isoform short	GM2A	2.01527e+06			Dihydrolipoyllysine-residue acetyltransferase component of pyruvate dehydrogenase complex, mitochondrial	DLAT	3.05037e+06
Retinol dehydrogenase 11	RDH11	2.00917e+06			Alanyl-tRNA editing protein Aarsd1	AARSD1	3.04373e+06
Protein FAM204A	FAM204A	2008200			Glucosylceramidase	GBA	3.04063e+06
KDEL motif-containing protein 2	KDELC2	2006740			Metallothionein-1F	MT1F	3037400
Protein Hook homolog 3	HOOK3	1.99883e+06			Apoptosis regulator BAX	BAX	3.03387e+06
Alanyl-tRNA editing protein Aarsd1	AARSD1	1.99857e+06			Proliferating cell nuclear antigen	PCNA	3.03193e+06
Proteasome assembly chaperone 3	PSMG3	1.99603e+06			U8 snoRNA-decapping enzyme	NUDT16	3026400
Sodium-coupled neutral amino acid transporter 4	SLC38A4	1993680			Equilibrative nucleoside transporter 1	SLC29A1	3021500
Protein CYR61	CYR61	1991610			Gamma-soluble NSF attachment protein	NAPG	3.01967e+06
AP-3 complex subunit delta-1	AP3D1	1.98997e+06			Signal transducer and activator of transcription 1-alpha/beta	STAT1	3.01303e+06
TSC22 domain family protein 4	TSC22D4	1.98927e+06			Cytochrome c oxidase subunit 6C	COX6C	3001400
Neuroplastin	NPTN	1.98423e+06			SAP domain-containing ribonucleoprotein	SARNP	2999900
Xylosyltransferase 1	XYLT1	1981400			Clathrin light chain A	CLTA	2998400
DNA fragmentation factor subunit alpha	DFFA	1980100			Heterochromatin protein 1-binding protein 3	HP1BP3	2.99557e+06
Hematological and neurological expressed 1-like protein	HN1L	1.97907e+06			Protein BRICK1	BRK1	2.99433e+06
Tetratricopeptide repeat protein 1	TTC1	1.97807e+06			DNA fragmentation factor subunit alpha	DFFA	2.98747e+06
Glucosamine-6-phosphate isomerase 1	GNPDA1	1.96767e+06			SRA stem-loop-interacting RNA-binding protein, mitochondrial	SLIRP	2985300
Calreticulin-3	CALR3	1.95903e+06			Stromal cell-derived factor 2-like protein 1	SDF2L1	2.97203e+06
Small ubiquitin-related modifier 1	SUMO1	1951900			AP-1 complex subunit gamma-1	AP1G1	2.96743e+06
RNA-binding protein Musashi homolog 2	MSI2	1.95103e+06			Perilipin-2	PLIN2	2.95696e+06
FAS-associated factor 2	FAF2	1948700			Succinyl-CoA ligase [GDP-forming] subunit beta, mitochondrial	SUCLG2	2951700
7-dehydrocholesterol reductase	DHCR7	1.9478e+06			Glycolipid transfer protein	GLTP	2.94733e+06
Golgin subfamily A member 2	GOLGA2	1942200			RNA-binding protein Musashi homolog 2	MSI2	2939000
N(G),N(G)-dimethylarginine dimethylaminohydrolase 2	DDAH2	1.94027e+06			G-protein-signaling modulator 1	GPSM1	2.93393e+06
Extended synaptotagmin-1	ESYT1	1.93453e+06			SUMO-activating enzyme subunit 1;SUMO-activating enzyme subunit 1, N-terminally processed	SAE1	2.92843e+06
Band 4.1-like protein 3;Band 4.1-like protein 3, N-terminally processed	EPB41L3	1927800			Isoleucine--tRNA ligase, mitochondrial	IARS2	2928000
Membrane magnesium transporter 1	MMGT1	1923000			Thioredoxin, mitochondrial	TXN2	2.92637e+06
Lymphocyte-specific protein 1	LSP1	1917500			SNARE-associated protein Snapin	SNAPIN	2.92217e+06
C-1-tetrahydrofolate synthase, cytoplasmic;Methylenetetrahydrofolate dehydrogenase;Methenyltetrahydrofolate cyclohydrolase;Formyltetrahydrofolate synthetase;C-1-tetrahydrofolate synthase, cytoplasmic, N-terminally processed	MTHFD1	1916000			Myeloid-associated differentiation marker	MYADM	2.91827e+06
Testin	TES	1.91077e+06			Vacuolar protein sorting-associated protein 4B	VPS4B	2.91637e+06
Tripartite motif-containing protein 47	TRIM47	1908900			5-AMP-activated protein kinase catalytic subunit alpha-1	PRKAA1	2.91327e+06
Medium-chain specific acyl-CoA dehydrogenase, mitochondrial	ACADM	1.90243e+06			182 kDa tankyrase-1-binding protein	TNKS1BP1	2.91273e+06
Cold shock domain-containing protein E1	CSDE1	1.89691e+06			MOB kinase activator 1A	MOB1A	2.91197e+06
Very-long-chain enoyl-CoA reductase	TECR	1.89603e+06			Transmembrane emp24 domain-containing protein 5	TMED5	2.88416e+06
Neutral amino acid transporter B(0)	SLC1A5	1895740			Liprin-beta-1	PPFIBP1	2881600
Signal peptide, CUB and EGF-like domain-containing protein 3	SCUBE3	1.89497e+06			Docking protein 1	DOK1	2.87427e+06
Transforming growth factor beta-1-induced transcript 1 protein	TGFB1I1	1.89437e+06			cAMP-dependent protein kinase catalytic subunit alpha	PRKACA	2865300
Thyroid hormone receptor-associated protein 3	THRAP3	1892600			Metalloproteinase inhibitor 3	TIMP3	2858500
Protein farnesyltransferase/geranylgeranyltransferase type-1 subunit alpha	FNTA	1.89083e+06			Constitutive coactivator of PPAR-gamma-like protein 1	FAM120A	2.85727e+06
Huntingtin-interacting protein K	HYPK	1.89043e+06			Fibronectin type III domain-containing protein 3B	FNDC3B	2.85703e+06
Tyrosine-protein phosphatase non-receptor type 11	PTPN11	1889500			Polypeptide N-acetylgalactosaminyltransferase 1;Polypeptide N-acetylgalactosaminyltransferase 1 soluble form	GALNT1	2.84453e+06
Eukaryotic translation initiation factor 5B	EIF5B	1887500			Mitochondrial import receptor subunit TOM7 homolog	TOMM7	2841800
1,2-dihydroxy-3-keto-5-methylthiopentene dioxygenase	ADI1	1882070			Thyroid receptor-interacting protein 6	TRIP6	2840700
Long-chain-fatty-acid--CoA ligase 3	ACSL3	1873500			EKC/KEOPS complex subunit TPRKB	TPRKB	2.83413e+06
Protein phosphatase 1 regulatory subunit 12A	PPP1R12A	1.87313e+06			Lysyl oxidase homolog 3	LOXL3	2831120
C-Myc-binding protein	MYCBP	1.86649e+06			RNA-binding protein EWS	EWSR1	2831100
Tumor necrosis factor alpha-induced protein 8	TNFAIP8	1.86472e+06			Transmembrane and coiled-coil domain-containing protein 1	TMCO1	2825200
Band 4.1-like protein 2	EPB41L2	1862900			Calcyclin-binding protein	CACYBP	2824600
GDP-mannose 4,6 dehydratase	GMDS	1.85953e+06			Protein FAM204A	FAM204A	2.82163e+06
NEDD8-activating enzyme E1 catalytic subunit	UBA3	1.85063e+06			Ras GTPase-activating protein-binding protein 2	G3BP2	2.81657e+06
Glutamine--fructose-6-phosphate aminotransferase [isomerizing] 2	GFPT2	1.84687e+06			Protein farnesyltransferase/geranylgeranyltransferase type-1 subunit alpha	FNTA	2.81357e+06
Sorting nexin-6;Sorting nexin-6, N-terminally processed	SNX6	1.84523e+06			Proline-rich AKT1 substrate 1	AKT1S1	2.80647e+06
Vacuolar protein sorting-associated protein 4B	VPS4B	1.84303e+06			Probable ATP-dependent RNA helicase DDX6	DDX6	2803900
Secretory carrier-associated membrane protein 1	SCAMP1	1.84167e+06			Erlin-2	ERLIN2	2.80253e+06
Peflin	PEF1	1841400			SEC14-like protein 2	SEC14L2	2.79733e+06
Basic leucine zipper and W2 domain-containing protein 1	BZW1	1.82117e+06			N-acylneuraminate cytidylyltransferase	CMAS	2795700
Serine/threonine-protein phosphatase PP1-alpha catalytic subunit	PPP1CA	1815020			NEDD8-activating enzyme E1 catalytic subunit	UBA3	2793500
Stromal cell-derived factor 2	SDF2	1.81113e+06			ATP-dependent RNA helicase DDX19B	DDX19B	2.79063e+06
Phosphotriesterase-related protein	PTER	1.80897e+06			Early endosome antigen 1	EEA1	2782000
Multiple inositol polyphosphate phosphatase 1	MINPP1	1807200			Thioredoxin reductase 1, cytoplasmic	TXNRD1	2.77583e+06
H/ACA ribonucleoprotein complex subunit 4	DKC1	1.80487e+06			Protein Hikeshi	C11orf73	2.76347e+06
Peptidyl-prolyl cis-trans isomerase-like 1	PPIL1	1803570			3-hydroxyisobutyrate dehydrogenase, mitochondrial	HIBADH	2.75877e+06
Glutamate--cysteine ligase regulatory subunit	GCLM	1.79937e+06			Regulator of nonsense transcripts 1	UPF1	2.75333e+06
Latexin	LXN	1.79387e+06			V-type proton ATPase subunit H	ATP6V1H	2749600
High mobility group protein HMG-I/HMG-Y	HMGA1	1.78637e+06			Interferon-inducible double-stranded RNA-dependent protein kinase activator A	PRKRA	2.73833e+06
Angiopoietin-related protein 5	ANGPTL5	1783100			Coiled-coil domain-containing protein 158	CCDC158	2.73773e+06
CD276 antigen	CD276	1.78053e+06			Cyclin-dependent kinase inhibitor 1C	CDKN1C	2.73383e+06
Oxysterol-binding protein 1	OSBP	1.77853e+06			Vasodilator-stimulated phosphoprotein	VASP	2.73267e+06
Cyclin-dependent kinase 6	CDK6	1.77233e+06			Ester hydrolase C11orf54	C11orf54	2.72827e+06
Deoxyhypusine hydroxylase	DOHH	1.76277e+06			Tetratricopeptide repeat protein 1	TTC1	2.72017e+06
Golgi integral membrane protein 4	GOLIM4	1.75803e+06			Aldo-keto reductase family 1 member C1;Aldo-keto reductase family 1 member C2	AKR1C1;AKR1C2	2716200
Ras-related protein Ral-A	RALA	1.75783e+06			Proteolipid protein 2	PLP2	2.70473e+06
Epsin-1	EPN1	1.75087e+06			Bifunctional methylenetetrahydrofolate dehydrogenase/cyclohydrolase, mitochondrial;NAD-dependent methylenetetrahydrofolate dehydrogenase;Methenyltetrahydrofolate cyclohydrolase	MTHFD2	2.69998e+06
DnaJ homolog subfamily A member 1	DNAJA1	1.74813e+06			Exportin-2	CSE1L	2.69803e+06
Catenin alpha-1	CTNNA1	1.74716e+06			Toll-interacting protein	TOLLIP	2.69533e+06
Torsin-1A-interacting protein 1	TOR1AIP1	1746900			CD151 antigen	CD151	2.69273e+06
Thioredoxin reductase 1, cytoplasmic	TXNRD1	1.73747e+06			NADH-ubiquinone oxidoreductase 75 kDa subunit, mitochondrial	NDUFS1	2.69123e+06
Matrix Gla protein	MGP	1.73477e+06			Sorting nexin-5	SNX5	2690200
Luc7-like protein 3	LUC7L3	1.73147e+06			Nuclear fragile X mental retardation-interacting protein 2	NUFIP2	2.68343e+06
Signal transducer and activator of transcription 1-alpha/beta	STAT1	1.73039e+06			Succinyl-CoA ligase [ADP-forming] subunit beta, mitochondrial	SUCLA2	2.68023e+06
Myosin-10	MYH10	1728200			Arf-GAP domain and FG repeat-containing protein 1	AGFG1	2.66403e+06
Exportin-2	CSE1L	1.72803e+06			Oxysterol-binding protein 1	OSBP	2663900
Cyclin-dependent kinase inhibitor 1C	CDKN1C	1.728e+06			EH domain-containing protein 3	EHD3	2.65673e+06
Cation-independent mannose-6-phosphate receptor	IGF2R	1.72703e+06			Calcium-binding mitochondrial carrier protein Aralar2	SLC25A13	2650500
PDZ domain-containing protein GIPC1	GIPC1	1.72484e+06			Chondroadherin-like protein	CHADL	2.64791e+06
ATP-dependent RNA helicase DDX19B	DDX19B	1.72483e+06			Ubiquitin-like modifier-activating enzyme 6	UBA6	2647400
EH domain-containing protein 3	EHD3	1.7239e+06			Dolichol-phosphate mannosyltransferase subunit 1	DPM1	2642700
Sjoegren syndrome/scleroderma autoantigen 1	SSSCA1	1.72353e+06			Eukaryotic initiation factor 4A-II;Eukaryotic initiation factor 4A-II, N-terminally processed	EIF4A2	2641400
Trafficking protein particle complex subunit 4	TRAPPC4	1718010			GTP-binding protein Rheb	RHEB	2640400
COP9 signalosome complex subunit 1	GPS1	1714300			Polypeptide N-acetylgalactosaminyltransferase 2;Polypeptide N-acetylgalactosaminyltransferase 2 soluble form	GALNT2	2628500
Endoplasmic reticulum lectin 1	ERLEC1	1711100			Ras-related protein Rab-21	RAB21	2.62553e+06
Epidermal growth factor receptor kinase substrate 8-like protein 2	EPS8L2	1.71067e+06			COP9 signalosome complex subunit 1	GPS1	2.62117e+06
Leucine zipper transcription factor-like protein 1	LZTFL1	1.70327e+06			Crk-like protein	CRKL	2.61167e+06
Metaxin-2	MTX2	1.70133e+06			Tyrosine-protein phosphatase non-receptor type 11	PTPN11	2.60363e+06
Protein FAM49B	FAM49B	1701130			Transgelin	TAGLN	2.59943e+06
ATP-dependent DNA helicase Q1	RECQL	1700200			Serine/arginine-rich splicing factor 10	SRSF10	2.59923e+06
Cleavage stimulation factor subunit 2;Cleavage stimulation factor subunit 2 tau variant	CSTF2;CSTF2T	1.69897e+06			ATP-binding cassette sub-family F member 1	ABCF1	2.59293e+06
RWD domain-containing protein 4	RWDD4	1.69887e+06			2,3-cyclic-nucleotide 3-phosphodiesterase	CNP	2.58161e+06
Aldo-keto reductase family 1 member C1;Aldo-keto reductase family 1 member C2	AKR1C1;AKR1C2	1.69603e+06			Intraflagellar transport protein 20 homolog	IFT20	2569490
GMP synthase [glutamine-hydrolyzing]	GMPS	1686700			Retinoid-inducible serine carboxypeptidase	SCPEP1	2.56683e+06
Dynamin-2	DNM2	1.68653e+06			Golgi-specific brefeldin A-resistance guanine nucleotide exchange factor 1	GBF1	2.55783e+06
Polyadenylate-binding protein-interacting protein 1	PAIP1	1.68653e+06			Golgi membrane protein 1	GOLM1	2.55163e+06
Protein YIF1A	YIF1A	1683600			Serine/arginine-rich splicing factor 9	SRSF9	2.55117e+06
Sorting nexin-2	SNX2	1.68357e+06			Uncharacterized protein C14orf142	C14orf142	2.54992e+06
5-AMP-activated protein kinase catalytic subunit alpha-1	PRKAA1	1.68003e+06			Sterol-4-alpha-carboxylate 3-dehydrogenase, decarboxylating	NSDHL	2.54983e+06
Translocating chain-associated membrane protein 1	TRAM1	1.67393e+06			Heat shock protein 75 kDa, mitochondrial	TRAP1	2545600
AP-1 complex subunit gamma-1	AP1G1	1673900			Dynamin-1-like protein	DNM1L	2.54537e+06
GDP-fucose protein O-fucosyltransferase 1	POFUT1	1673700			Protein phosphatase 1 regulatory subunit 12A	PPP1R12A	2.54327e+06
Constitutive coactivator of PPAR-gamma-like protein 1	FAM120A	1.67273e+06			Transmembrane protein 214	TMEM214	2541350
Succinyl-CoA ligase [ADP/GDP-forming] subunit alpha, mitochondrial	SUCLG1	1670700			28S ribosomal protein S36, mitochondrial	MRPS36	2.54107e+06
Target of Myb protein 1	TOM1	1.66552e+06			Small ubiquitin-related modifier 1	SUMO1	2.53657e+06
Delta-aminolevulinic acid dehydratase	ALAD	1664500			Laminin subunit beta-2	LAMB2	2.53517e+06
PEST proteolytic signal-containing nuclear protein	PCNP	1.65877e+06			Apoptosis inhibitor 5	API5	2532800
Phosphoribosyl pyrophosphate synthase-associated protein 2	PRPSAP2	1.65815e+06			Tetraspanin-13	TSPAN13	2.53097e+06
Rho guanine nucleotide exchange factor 1	ARHGEF1	1.65677e+06			Histone-lysine N-methyltransferase SETD7	SETD7	2.52287e+06
Collagen alpha-2(V) chain	COL5A2	1.65243e+06			Multiple inositol polyphosphate phosphatase 1	MINPP1	2.52257e+06
Lanosterol synthase	LSS	1.65027e+06			Putative peptidyl-tRNA hydrolase PTRHD1	PTRHD1	2.52123e+06
NEDD8-activating enzyme E1 regulatory subunit	NAE1	1646600			Splicing factor 3B subunit 2	SF3B2	2515600
DnaJ homolog subfamily B member 1	DNAJB1	1646300			Protein YIF1A	YIF1A	2.51473e+06
RNA-binding protein Raly	RALY	1640100			Luc7-like protein 3	LUC7L3	2.51443e+06
Delta-sarcoglycan	SGCD	1.63767e+06			Translation initiation factor eIF-2B subunit epsilon	EIF2B5	2.51193e+06
Calpain-1 catalytic subunit	CAPN1	1.63553e+06			NADH dehydrogenase [ubiquinone] 1 alpha subcomplex subunit 3	NDUFA3	2506100
Proline-rich AKT1 substrate 1	AKT1S1	1632900			Fibrillin-1	FBN1	2.50033e+06
Metalloproteinase inhibitor 1	TIMP1	1626600			Minor histocompatibility antigen H13	HM13	2.49353e+06
Protein kinase C alpha type	PRKCA	1622900			C-terminal-binding protein 1	CTBP1	2.47643e+06
Mannose-6-phosphate isomerase	MPI	1.62165e+06			Core histone macro-H2A.2	H2AFY2	2476100
3-hydroxyisobutyrate dehydrogenase, mitochondrial	HIBADH	1.61983e+06			Delta-sarcoglycan	SGCD	2.47583e+06
ADP-ribosylation factor 6	ARF6	1.61943e+06			Peptidyl-prolyl cis-trans isomerase-like 3	PPIL3	2460180
Protein FAM98B	FAM98B	1.61887e+06			Transmembrane emp24 domain-containing protein 1	TMED1	2.45157e+06
Serine/threonine-protein kinase Nek9	NEK9	1.61447e+06			Golgin subfamily A member 3	GOLGA3	2.44267e+06
Eukaryotic translation initiation factor 1A, X-chromosomal	EIF1AX	1.61173e+06			High mobility group protein HMG-I/HMG-Y	HMGA1	2438900
Ras-related protein Ral-B	RALB	1.60833e+06			Heterogeneous nuclear ribonucleoprotein A/B	HNRNPAB	2.42933e+06
Arfaptin-2	ARFIP2	1606870			Ubiquitin-conjugating enzyme E2 H	UBE2H	2.42473e+06
Synaptopodin	SYNPO	1.60584e+06			Gap junction alpha-1 protein	GJA1	2423600
Glucose-induced degradation protein 8 homolog	GID8	1.60089e+06			Peflin	PEF1	2.41353e+06
Splicing factor 1	SF1	1597900			Nitrilase homolog 1	NIT1	2412300
Leucine-rich PPR motif-containing protein, mitochondrial	LRPPRC	1596830			Macrophage-capping protein	CAPG	2.40514e+06
Rho-related GTP-binding protein RhoB	RHOB	1595400			BET1-like protein	BET1L	2.39643e+06
Liprin-beta-1	PPFIBP1	1.59197e+06			Replication protein A 14 kDa subunit	RPA3	2.39503e+06
Fumarylacetoacetate hydrolase domain-containing protein 2A	FAHD2A	1.59058e+06			Sorting nexin-6;Sorting nexin-6, N-terminally processed	SNX6	2392400
Zinc finger CCCH domain-containing protein 15	ZC3H15	1585800			RNA-binding protein 39	RBM39	2.39163e+06
Carboxymethylenebutenolidase homolog	CMBL	1.58464e+06			Immunity-related GTPase family Q protein	IRGQ	2.38817e+06
2,3-cyclic-nucleotide 3-phosphodiesterase	CNP	1.58413e+06			CD63 antigen	CD63	2.38096e+06
Protein DEK	DEK	1.58165e+06			Nucleoplasmin-3	NPM3	2379020
Regulation of nuclear pre-mRNA domain-containing protein 1B	RPRD1B	1.58033e+06			Guanosine-3,5-bis(diphosphate) 3-pyrophosphohydrolase MESH1	HDDC3	2.37567e+06
Minor histocompatibility antigen H13	HM13	1.57937e+06			Synapse-associated protein 1	SYAP1	2.37407e+06
Succinyl-CoA ligase [GDP-forming] subunit beta, mitochondrial	SUCLG2	1575800			Haloacid dehalogenase-like hydrolase domain-containing protein 2	HDHD2	2367300
Mitochondrial 2-oxoglutarate/malate carrier protein	SLC25A11	1.57523e+06			Serine/arginine-rich splicing factor 11	SRSF11	2362200
CAD protein;Glutamine-dependent carbamoyl-phosphate synthase;Aspartate carbamoyltransferase;Dihydroorotase	CAD	1.57397e+06			Integrin-linked protein kinase	ILK	2.36183e+06
Microtubule-associated protein RP/EB family member 3	MAPRE3	1.57327e+06			Beta-2-syntrophin	SNTB2	2.36093e+06
rRNA 2-O-methyltransferase fibrillarin	FBL	1.57257e+06			AP-1 complex subunit sigma-1A	AP1S1	2.35703e+06
Serine/threonine-protein phosphatase 5	PPP5C	1572200			Very-long-chain enoyl-CoA reductase	TECR	2.35387e+06
Transient receptor potential cation channel subfamily V member 4	TRPV4	1.57153e+06			cAMP-regulated phosphoprotein 19	ARPP19	2353000
Ubiquitin domain-containing protein UBFD1	UBFD1	1.56543e+06			Protein Hook homolog 3	HOOK3	2.3516e+06
Laminin subunit beta-2	LAMB2	1.55997e+06			Calpain-1 catalytic subunit	CAPN1	2347900
Endothelial protein C receptor	PROCR	1557000			Huntingtin-interacting protein 1	HIP1	2346060
U8 snoRNA-decapping enzyme	NUDT16	1.55667e+06			Dermatopontin	DPT	2334100
Calcium-binding mitochondrial carrier protein SCaMC-1	SLC25A24	1.54923e+06			FACT complex subunit SSRP1	SSRP1	2.33247e+06
U1 small nuclear ribonucleoprotein 70 kDa	SNRNP70	1.54783e+06			Gamma-glutamylcyclotransferase	GGCT	2330800
Mitochondrial antiviral-signaling protein	MAVS	1546600			Vasorin	VASN	2.32343e+06
Paraspeckle component 1	PSPC1	1544000			Signal transducing adapter molecule 1	STAM	2.32243e+06
Sterol-4-alpha-carboxylate 3-dehydrogenase, decarboxylating	NSDHL	1.54373e+06			Calponin-2	CNN2	2.31193e+06
Hepatoma-derived growth factor-related protein 3;Hepatoma-derived growth factor-related protein 2	HDGFRP3;HDGFRP2	1.53957e+06			Retinol dehydrogenase 11	RDH11	2308400
DnaJ homolog subfamily C member 3	DNAJC3	1.53766e+06			Golgi integral membrane protein 4	GOLIM4	2.30713e+06
Transmembrane and coiled-coil domain-containing protein 1	TMCO1	1.53507e+06			HD domain-containing protein 2	HDDC2	2295800
Nucleolysin TIAR;Nucleolysin TIA-1 isoform p40	TIAL1;TIA1	1.53387e+06			Mitochondrial antiviral-signaling protein	MAVS	2.29427e+06
NADH dehydrogenase [ubiquinone] iron-sulfur protein 4, mitochondrial	NDUFS4	1.53354e+06			Unconventional myosin-Ie	MYO1E	2.29413e+06
Scaffold attachment factor B1	SAFB	1530280			Transmembrane emp24 domain-containing protein 4	TMED4	2.29207e+06
Protein phosphatase 1 regulatory subunit 14C	PPP1R14C	1.52435e+06			Pyruvate carboxylase, mitochondrial	PC	2.29117e+06
Apoptosis inhibitor 5	API5	1.52337e+06			Acyl-coenzyme A thioesterase 9, mitochondrial	ACOT9	2.29097e+06
Myosin phosphatase Rho-interacting protein	MPRIP	1.52167e+06			Phosphoribosyl pyrophosphate synthase-associated protein 2	PRPSAP2	2273620
Splicing factor 3B subunit 4	SF3B4	1.52117e+06			Probable ATP-dependent RNA helicase DDX5	DDX5	2.26437e+06
Dual specificity protein phosphatase 3	DUSP3	1518900			Dehydrogenase/reductase SDR family member 4	DHRS4	2.26433e+06
Dynamin-1-like protein	DNM1L	1517100			Poly(U)-binding-splicing factor PUF60	PUF60	2.26327e+06
Dolichyl-diphosphooligosaccharide--protein glycosyltransferase subunit STT3B	STT3B	1516200			Heat shock protein beta-7	HSPB7	2.25673e+06
Dr1-associated corepressor	DRAP1	1.51593e+06			Mitochondrial-processing peptidase subunit alpha	PMPCA	2.25169e+06
RNA 3-terminal phosphate cyclase	RTCA	1.51513e+06			Dynactin subunit 4	DCTN4	2.24853e+06
Enoyl-CoA delta isomerase 1, mitochondrial	ECI1	1507300			Hemoglobin subunit beta;LVV-hemorphin-7;Spinorphin;Hemoglobin subunit delta	HBB;HBD	2.24507e+06
TOM1-like protein 2	TOM1L2	1506700			Heterogeneous nuclear ribonucleoprotein A0	HNRNPA0	2.24377e+06
N-acylneuraminate cytidylyltransferase	CMAS	1.50637e+06			ATP-dependent RNA helicase DDX42	DDX42	2.24284e+06
Golgi membrane protein 1	GOLM1	1.50621e+06			D-tyrosyl-tRNA(Tyr) deacylase 1	DTD1	2.24183e+06
Chromatin target of PRMT1 protein	CHTOP	1.50487e+06			Spartin	SPG20	2.24153e+06
ADP/ATP translocase 2;ADP/ATP translocase 2, N-terminally processed	SLC25A5	1.50263e+06			Short coiled-coil protein	SCOC	2238240
Probable ATP-dependent RNA helicase DDX5	DDX5	1499100			Derlin-2	DERL2	2213100
Heat shock protein beta-8	HSPB8	1.49673e+06			Latexin	LXN	2.21067e+06
Guanosine-3,5-bis(diphosphate) 3-pyrophosphohydrolase MESH1	HDDC3	1.49608e+06			UPF0449 protein C19orf25	C19orf25	2209870
Carbohydrate sulfotransferase 3	CHST3	1.49593e+06			Acylglycerol kinase, mitochondrial	AGK	2.20627e+06
Protein jagunal homolog 1	JAGN1	1.49147e+06			Gamma-glutamyl hydrolase	GGH	2.19683e+06
Nicotinate-nucleotide pyrophosphorylase [carboxylating]	QPRT	1485090			Eukaryotic translation initiation factor 4 gamma 2	EIF4G2	2196800
ATP-dependent 6-phosphofructokinase, muscle type	PFKM	1482300			Sorbitol dehydrogenase	SORD	2.19504e+06
Core histone macro-H2A.2	H2AFY2	1480510			Cation-independent mannose-6-phosphate receptor	IGF2R	2.19477e+06
Cytoplasmic FMR1-interacting protein 1	CYFIP1	1.46503e+06			Angiopoietin-related protein 5	ANGPTL5	2.19261e+06
Short coiled-coil protein	SCOC	1464900			Bifunctional ATP-dependent dihydroxyacetone kinase/FAD-AMP lyase (cyclizing);ATP-dependent dihydroxyacetone kinase;FAD-AMP lyase (cyclizing)	DAK	2.19203e+06
Alpha-ketoglutarate-dependent dioxygenase FTO	FTO	1.45353e+06			Mannose-6-phosphate isomerase	MPI	2.19107e+06
COMM domain-containing protein 9	COMMD9	1.45177e+06			Polyadenylate-binding protein-interacting protein 1	PAIP1	2.18843e+06
Nucleoporin Nup37	NUP37	1.44539e+06			BRCA2 and CDKN1A-interacting protein	BCCIP	2.18625e+06
LIM domain only protein 7	LMO7	1.44293e+06			Protein FAM98B	FAM98B	2.17827e+06
Ubiquitin carboxyl-terminal hydrolase isozyme L5	UCHL5	1.44163e+06			Neuroplastin	NPTN	2.17177e+06
Putative adenosylhomocysteinase 2;Putative adenosylhomocysteinase 3	AHCYL1;AHCYL2	1.44082e+06			Ubiquitin-conjugating enzyme E2 D1;Ubiquitin-conjugating enzyme E2 D4	UBE2D1;UBE2D4	2.16818e+06
Trans-3-hydroxy-L-proline dehydratase	L3HYPDH	1.43873e+06			PRA1 family protein 2	PRAF2	2.15943e+06
N-terminal kinase-like protein	SCYL1	1.43863e+06			Prostaglandin reductase 1	PTGR1	2155800
CD63 antigen	CD63	1.43657e+06			Unconventional myosin-Ib	MYO1B	2.14853e+06
Derlin-2	DERL2	1432600			Nexilin	NEXN	2148300
Apoptosis-inducing factor 1, mitochondrial	AIFM1	1.43057e+06			Vesicle-associated membrane protein-associated protein B/C	VAPB	2.14797e+06
Sorting nexin-4	SNX4	1430090					2.14007e+06
Reticulon-3	RTN3	1.42717e+06			Mitochondrial-processing peptidase subunit beta	PMPCB	2.13313e+06
Protein lifeguard 3	TMBIM1	1.42207e+06			Pyrroline-5-carboxylate reductase 3	PYCRL	2130400
Transcription factor COE2	EBF2	1.42077e+06			Histone-binding protein RBBP7	RBBP7	2121570
D-tyrosyl-tRNA(Tyr) deacylase 1	DTD1	1418950			Cystathionine gamma-lyase	CTH	2.11737e+06
Methionine aminopeptidase 2	METAP2	1.41037e+06			NEDD8-activating enzyme E1 regulatory subunit	NAE1	2.11587e+06
Myosin regulatory light polypeptide 9	MYL9	1.40933e+06			GDP-mannose 4,6 dehydratase	GMDS	2.11506e+06
5-AMP-activated protein kinase subunit gamma-1	PRKAG1	1.40433e+06			Sialidase-1	NEU1	2.09503e+06
Plasma membrane calcium-transporting ATPase 4	ATP2B4	1.39373e+06			Stromal cell-derived factor 2	SDF2	2093700
Isoleucine--tRNA ligase, mitochondrial	IARS2	1.39167e+06			Inositol polyphosphate 1-phosphatase	INPP1	2081850
Protein BRICK1	BRK1	1.38887e+06			Guanine nucleotide-binding protein subunit alpha-11	GNA11	2.07983e+06
ATP-binding cassette sub-family F member 1	ABCF1	1386690			Leucine-rich repeat-containing protein 1	LRRC1	2.07908e+06
NADH dehydrogenase [ubiquinone] iron-sulfur protein 6, mitochondrial	NDUFS6	1.38611e+06			Aspartyl aminopeptidase	DNPEP	2.07572e+06
Spartin	SPG20	1.38393e+06			Protein flightless-1 homolog	FLII	2074200
Guanine nucleotide-binding protein subunit alpha-11	GNA11	1.38237e+06			Thyroid hormone receptor-associated protein 3	THRAP3	2069800
Protein lunapark	LNP	1.38181e+06			Collagen alpha-1(V) chain	COL5A1	2.06887e+06
Golgi-specific brefeldin A-resistance guanine nucleotide exchange factor 1	GBF1	1.37957e+06			Procollagen C-endopeptidase enhancer 1	PCOLCE	2.06597e+06
Multidrug resistance-associated protein 1	ABCC1	1.37877e+06			NADH dehydrogenase [ubiquinone] iron-sulfur protein 6, mitochondrial	NDUFS6	2056600
Endoglin	ENG	1361370			Phosphoribosyl pyrophosphate synthase-associated protein 1	PRPSAP1	2.05117e+06
NudC domain-containing protein 2	NUDCD2	1.36083e+06			MMS19 nucleotide excision repair protein homolog	MMS19	2.04259e+06
Polypeptide N-acetylgalactosaminyltransferase 1;Polypeptide N-acetylgalactosaminyltransferase 1 soluble form	GALNT1	1.35589e+06			Deoxyhypusine hydroxylase	DOHH	2.04113e+06
Death-associated protein 1	DAP	1.35317e+06			Protein archease	ZBTB8OS	2.03797e+06
Translation initiation factor eIF-2B subunit epsilon	EIF2B5	1.35313e+06			Laminin subunit beta-1	LAMB1	2.03613e+06
UPF0160 protein MYG1, mitochondrial	C12orf10	1.35206e+06			Golgin subfamily A member 2	GOLGA2	2028300
Deoxyuridine 5-triphosphate nucleotidohydrolase, mitochondrial	DUT	1348400			Phosphomevalonate kinase	PMVK	2025890
Diphosphoinositol polyphosphate phosphohydrolase 2	NUDT4	1345600			Cytosolic purine 5-nucleotidase	NT5C2	2.02087e+06
Wiskott-Aldrich syndrome protein family member 2	WASF2	1.34453e+06			Zinc finger protein-like 1	ZFPL1	2.01537e+06
UV excision repair protein RAD23 homolog A	RAD23A	1.34222e+06			Argininosuccinate lyase	ASL	2011180
Polypeptide N-acetylgalactosaminyltransferase 2;Polypeptide N-acetylgalactosaminyltransferase 2 soluble form	GALNT2	1.34212e+06			Regulator of microtubule dynamics protein 3	RMDN3	2.00783e+06
G-protein-signaling modulator 1	GPSM1	1.34209e+06			Nucleolysin TIAR;Nucleolysin TIA-1 isoform p40	TIAL1;TIA1	2.00714e+06
Alpha-1,3/1,6-mannosyltransferase ALG2	ALG2	1.34098e+06			Regulator of chromosome condensation	RCC1	2.00573e+06
Calponin-2	CNN2	1340900			Reticulon-3	RTN3	2004800
3-beta-hydroxysteroid-Delta(8),Delta(7)-isomerase	EBP	1338700			U1 small nuclear ribonucleoprotein 70 kDa	SNRNP70	2.00213e+06
Regulator of chromosome condensation	RCC1	1336960			Paraspeckle component 1	PSPC1	2.00147e+06
Transcription elongation factor A protein-like 3;Transcription elongation factor A protein-like 6	TCEAL3;TCEAL6	1336120			Phospholipase A-2-activating protein	PLAA	2.00037e+06
Putative uncharacterized protein LOC400499		1.33557e+06			Dehydrogenase/reductase SDR family member 7	DHRS7	1999410
Alpha-taxilin	TXLNA	1.33232e+06			BAG family molecular chaperone regulator 5	BAG5	1.99116e+06
Ethanolamine-phosphate cytidylyltransferase	PCYT2	1330700			Maleylacetoacetate isomerase	GSTZ1	1990800
7,8-dihydro-8-oxoguanine triphosphatase	NUDT1	1.32799e+06			RWD domain-containing protein 4	RWDD4	1986800
Actin-like protein 6A	ACTL6A	1327600			Protein-glutamate O-methyltransferase	ARMT1	1.97173e+06
Far upstream element-binding protein 3	FUBP3	1327380			Peptidyl-prolyl cis-trans isomerase-like 1	PPIL1	1968800
Cleavage and polyadenylation specificity factor subunit 6	CPSF6	1321830			Hematological and neurological expressed 1-like protein	HN1L	1.96737e+06
Peptidyl-prolyl cis-trans isomerase F, mitochondrial	PPIF	1.3186e+06			AMP deaminase 2	AMPD2	1.96523e+06
Bifunctional ATP-dependent dihydroxyacetone kinase/FAD-AMP lyase (cyclizing);ATP-dependent dihydroxyacetone kinase;FAD-AMP lyase (cyclizing)	DAK	1318300			Dynamin-2	DNM2	1958200
Four and a half LIM domains protein 2	FHL2	1314730			N-alpha-acetyltransferase 10	NAA10	1.95487e+06
Prostacyclin synthase	PTGIS	1.31414e+06			m7GpppX diphosphatase	DCPS	1.95483e+06
Zinc finger protein-like 1	ZFPL1	1.31277e+06			Arfaptin-2	ARFIP2	1.95087e+06
Ras GTPase-activating protein-binding protein 2	G3BP2	1.31097e+06			Alpha-taxilin	TXLNA	1.94967e+06
Dehydrogenase/reductase SDR family member 7	DHRS7	1309270			DCC-interacting protein 13-alpha	APPL1	1.94867e+06
U6 snRNA-associated Sm-like protein LSm6	LSM6	1.30817e+06			Microtubule-associated protein 1A;MAP1A heavy chain;MAP1 light chain LC2	MAP1A	1.94783e+06
Ras-related protein Rab-6C	RAB6C	1.30453e+06			Trafficking protein particle complex subunit 4	TRAPPC4	1945060
Protein lin-7 homolog C;Protein lin-7 homolog B;Protein lin-7 homolog A	LIN7C;LIN7B;LIN7A	1303750			COMM domain-containing protein 2	COMMD2	1.94366e+06
Microtubule-associated proteins 1A/1B light chain 3B;Microtubule-associated proteins 1A/1B light chain 3 beta 2;Microtubule-associated proteins 1A/1B light chain 3A	MAP1LC3B;MAP1LC3B2;MAP1LC3A	1.30368e+06			Serine/threonine-protein kinase 24;Serine/threonine-protein kinase 24 36 kDa subunit;Serine/threonine-protein kinase 24 12 kDa subunit	STK24	1.94067e+06
Inactive serine protease PAMR1	PAMR1	1299900			Muscleblind-like protein 1;Muscleblind-like protein 2	MBNL1;MBNL2	1939500
NAD(P)H dehydrogenase [quinone] 1	NQO1	1295350			U1 small nuclear ribonucleoprotein C	SNRPC	1.93863e+06
Methylmalonyl-CoA mutase, mitochondrial	MUT	1.29477e+06			Mitochondrial import inner membrane translocase subunit TIM16	PAM16	1.93313e+06
Catenin delta-1	CTNND1	1274240			CTP synthase 1	CTPS1	1.93184e+06
N-alpha-acetyltransferase 10	NAA10	1.27333e+06			Ras-related protein Rab-8A	RAB8A	1931210
Disks large homolog 1	DLG1	1272000			Sorting nexin-4	SNX4	1929700
Haptoglobin;Haptoglobin alpha chain;Haptoglobin beta chain;Haptoglobin-related protein	HP;HPR	1.26988e+06			Aldose 1-epimerase	GALM	1.92795e+06
LIM and calponin homology domains-containing protein 1	LIMCH1	1.26867e+06			Alpha-1,3/1,6-mannosyltransferase ALG2	ALG2	1.92566e+06
Mitochondrial import receptor subunit TOM20 homolog	TOMM20	1.26587e+06			Tetraspanin-4	TSPAN4	1.92073e+06
Aspartyl aminopeptidase	DNPEP	1264870			Tumor necrosis factor alpha-induced protein 8	TNFAIP8	1.91831e+06
Protein RCC2	RCC2	1261140			Translation initiation factor eIF-2B subunit gamma	EIF2B3	1.90353e+06
Sodium/potassium-transporting ATPase subunit beta-3	ATP1B3	1.26096e+06			Myosin phosphatase Rho-interacting protein	MPRIP	1.89993e+06
Ubiquitin-like modifier-activating enzyme 6	UBA6	1.2597e+06			SPRY domain-containing protein 7	SPRYD7	1.89807e+06
EH domain-containing protein 1	EHD1	1.25862e+06			Pre-mRNA-splicing factor ATP-dependent RNA helicase DHX15	DHX15	1.89731e+06
Replication protein A 14 kDa subunit	RPA3	1257400			Carboxymethylenebutenolidase homolog	CMBL	1897200
Sorting nexin-7	SNX7	1.25627e+06			Acylpyruvase FAHD1, mitochondrial	FAHD1	1.89583e+06
3-hydroxybutyrate dehydrogenase type 2	BDH2	1.25535e+06			Importin-9	IPO9	1.89193e+06
Retinoid-inducible serine carboxypeptidase	SCPEP1	1254300			Glutamine--fructose-6-phosphate aminotransferase [isomerizing] 2	GFPT2	1890900
Signal transducing adapter molecule 1	STAM	1.25399e+06			Protein lunapark	LNP	1.89063e+06
Toll-interacting protein	TOLLIP	1.25291e+06			Coiled-coil domain-containing protein 43	CCDC43	1.88827e+06
SH3 domain-containing kinase-binding protein 1	SH3KBP1	1.2514e+06			Dolichyl-phosphate beta-glucosyltransferase	ALG5	1884190
Vesicle transport protein GOT1B	GOLT1B	1.24952e+06			Methylsterol monooxygenase 1	MSMO1	1.88277e+06
Nitrilase homolog 1	NIT1	1.24807e+06			Phosphopantothenate--cysteine ligase	PPCS	1882700
Peptidyl-prolyl cis-trans isomerase-like 3	PPIL3	1247800			Tumor necrosis factor receptor type 1-associated DEATH domain protein	TRADD	1880040
Protein quaking	QKI	1.24577e+06			Wiskott-Aldrich syndrome protein family member 2	WASF2	1.87993e+06
Protein FAM188A	FAM188A	1245150			Cytochrome b reductase 1	CYBRD1	1.87817e+06
Cytochrome c oxidase subunit 4 isoform 1, mitochondrial	COX4I1	1243210			Cytoplasmic FMR1-interacting protein 1	CYFIP1	1.87311e+06
UPF0449 protein C19orf25	C19orf25	1.24185e+06			Metabotropic glutamate receptor 1	GRM1	1.85605e+06
Zinc finger Ran-binding domain-containing protein 2	ZRANB2	1.23904e+06			Chromobox protein homolog 1	CBX1	1845700
Intraflagellar transport protein 20 homolog	IFT20	1.2361e+06			DNA-dependent protein kinase catalytic subunit	PRKDC	1.84561e+06
AMP deaminase 2	AMPD2	1235720			Dual specificity protein phosphatase 3	DUSP3	1833140
Catenin beta-1	CTNNB1	1235130			Adaptin ear-binding coat-associated protein 2	NECAP2	1.83037e+06
Acylglycerol kinase, mitochondrial	AGK	1233300			Zinc finger CCCH domain-containing protein 15	ZC3H15	1.83027e+06
Charged multivesicular body protein 2a	CHMP2A	1.23275e+06			Exosome complex component RRP41	EXOSC4	1.82987e+06
Stromal interaction molecule 1	STIM1	1.23143e+06			Developmentally-regulated GTP-binding protein 1	DRG1	1829270
Glutathione S-transferase kappa 1	GSTK1	1231300			Synaptophysin-like protein 1	SYPL1	1824880
CDP-diacylglycerol--inositol 3-phosphatidyltransferase	CDIPT	1.22904e+06					1817400
Latent-transforming growth factor beta-binding protein 2	LTBP2	1.22769e+06			Zinc finger Ran-binding domain-containing protein 2	ZRANB2	1812800
Follistatin-related protein 1	FSTL1	1226880			Mammalian ependymin-related protein 1	EPDR1	1.8023e+06
Platelet-activating factor acetylhydrolase IB subunit gamma	PAFAH1B3	1.22397e+06			CAP-Gly domain-containing linker protein 1	CLIP1	1.80207e+06
Ribose-phosphate pyrophosphokinase 2	PRPS2	1.22306e+06			Delta-aminolevulinic acid dehydratase	ALAD	1801720
Geranylgeranyl transferase type-2 subunit alpha	RABGGTA	1222200			Cleavage stimulation factor subunit 2;Cleavage stimulation factor subunit 2 tau variant	CSTF2;CSTF2T	1.79957e+06
Integrin alpha-L	ITGAL	1.22113e+06			Phosducin-like protein 3	PDCL3	1.79677e+06
Arf-GAP with coiled-coil, ANK repeat and PH domain-containing protein 2	ACAP2	1.21777e+06			Mitochondrial carnitine/acylcarnitine carrier protein	SLC25A20	1.79397e+06
Pinin	PNN	1217480			Anamorsin	CIAPIN1	1791530
Bifunctional methylenetetrahydrofolate dehydrogenase/cyclohydrolase, mitochondrial;NAD-dependent methylenetetrahydrofolate dehydrogenase;Methenyltetrahydrofolate cyclohydrolase	MTHFD2	1.21398e+06			DnaJ homolog subfamily B member 1	DNAJB1	1.77998e+06
Epiphycan	EPYC	1.21059e+06			Integral membrane protein 2B;BRI2, membrane form;BRI2 intracellular domain;BRI2C, soluble form;Bri23 peptide	ITM2B	1779500
Ras-related protein Rab-5A	RAB5A	1210200			CDGSH iron-sulfur domain-containing protein 1	CISD1	1.77567e+06
Myeloid-associated differentiation marker	MYADM	1.20855e+06			N-terminal kinase-like protein	SCYL1	1775350
Beta-2-syntrophin	SNTB2	1206050			Haptoglobin;Haptoglobin alpha chain;Haptoglobin beta chain;Haptoglobin-related protein	HP;HPR	1.77123e+06
Tubulin gamma-2 chain;Tubulin gamma-1 chain	TUBG2;TUBG1	1.20094e+06			Dolichyl-diphosphooligosaccharide--protein glycosyltransferase subunit STT3B	STT3B	1.76857e+06
Acyl carrier protein, mitochondrial	NDUFAB1	1199700			Guanine nucleotide-binding protein-like 3	GNL3	1.76751e+06
Eukaryotic translation initiation factor 4 gamma 2	EIF4G2	1.19807e+06			NAD-dependent malic enzyme, mitochondrial	ME2	1.76645e+06
Developmentally-regulated GTP-binding protein 1	DRG1	1.19663e+06			ATPase family AAA domain-containing protein 3A;ATPase family AAA domain-containing protein 3C	ATAD3A;ATAD3C	1.76581e+06
MMS19 nucleotide excision repair protein homolog	MMS19	1196490			Gamma-glutamylaminecyclotransferase	GGACT	1.76029e+06
Importin-9	IPO9	1192700			Splicing factor 1	SF1	1756800
5-nucleotidase	NT5E	1.18873e+06			Lysophospholipase-like protein 1	LYPLAL1	1.75649e+06
Stathmin-2	STMN2	1.18624e+06			Translocating chain-associated membrane protein 1	TRAM1	1.7554e+06
LIM domain and actin-binding protein 1	LIMA1	1.18594e+06			Signal recognition particle 54 kDa protein	SRP54	1.74977e+06
Glypican-1;Secreted glypican-1	GPC1	1.18479e+06			Mitochondrial import inner membrane translocase subunit TIM50	TIMM50	1.74873e+06
Succinyl-CoA ligase [ADP-forming] subunit beta, mitochondrial	SUCLA2	1.18398e+06			N-terminal Xaa-Pro-Lys N-methyltransferase 1;N-terminal Xaa-Pro-Lys N-methyltransferase 1, N-terminally processed	NTMT1	1.74827e+06
Derlin-1	DERL1	1.1834e+06			Protein jagunal homolog 1	JAGN1	1.74323e+06
CDGSH iron-sulfur domain-containing protein 1	CISD1	1.18217e+06			Golgi SNAP receptor complex member 1	GOSR1	1743200
Tetraspanin-4	TSPAN4	1.18083e+06			PDZ domain-containing protein GIPC2	GIPC2	1742590
Integrin beta-like protein 1	ITGBL1	1.17407e+06			Microtubule-associated protein RP/EB family member 2	MAPRE2	1.74035e+06
Ras-related protein Rab-8A	RAB8A	1168450			Geranylgeranyl transferase type-2 subunit alpha	RABGGTA	1.73978e+06
Small nuclear ribonucleoprotein-associated protein N;Small nuclear ribonucleoprotein-associated proteins B and B	SNRPN;SNRPB	1.16777e+06			Leucine zipper transcription factor-like protein 1	LZTFL1	1.73725e+06
Adaptin ear-binding coat-associated protein 2	NECAP2	1.16711e+06			DNA-directed RNA polymerases I, II, and III subunit RPABC3	POLR2H	1.73393e+06
Immunity-related GTPase family Q protein	IRGQ	1.15952e+06			Sorting nexin-7	SNX7	1728100
AP-1 complex subunit sigma-1A	AP1S1	1.15843e+06			Geranylgeranyl transferase type-2 subunit beta	RABGGTB	1.72002e+06
Signal recognition particle 54 kDa protein	SRP54	1156920			MAM domain-containing protein 2	MAMDC2	1.71743e+06
CD99 antigen-like protein 2	CD99L2	1.15614e+06			Transthyretin	TTR	1713500
Phospholipase A-2-activating protein	PLAA	1.15553e+06			CAD protein;Glutamine-dependent carbamoyl-phosphate synthase;Aspartate carbamoyltransferase;Dihydroorotase	CAD	1.71236e+06
Cell cycle and apoptosis regulator protein 2	CCAR2	1.15417e+06			Acetolactate synthase-like protein	ILVBL	1.71102e+06
Proteasome assembly chaperone 1	PSMG1	1.15392e+06			CD99 antigen-like protein 2	CD99L2	1707900
Golgi SNAP receptor complex member 1	GOSR1	1.15366e+06			LIM and calponin homology domains-containing protein 1	LIMCH1	1.70753e+06
Thymidine phosphorylase	TYMP	1.14899e+06			CDP-diacylglycerol--inositol 3-phosphatidyltransferase	CDIPT	1.70208e+06
Autophagy protein 5	ATG5	1.14737e+06			Bleomycin hydrolase	BLMH	1.69904e+06
Ubiquilin-2	UBQLN2	1.14488e+06			UPF0160 protein MYG1, mitochondrial	C12orf10	1684050
Argininosuccinate lyase	ASL	1.1428e+06			Dr1-associated corepressor	DRAP1	1.68349e+06
28S ribosomal protein S36, mitochondrial	MRPS36	1139850			AP-3 complex subunit beta-1	AP3B1	1.68277e+06
Transthyretin	TTR	1139560			39S ribosomal protein L49, mitochondrial	MRPL49	1.68133e+06
Beta-actin-like protein 2	ACTBL2	1137790			Myosin regulatory light polypeptide 9	MYL9	1.68103e+06
Glycolipid transfer protein	GLTP	1134310			Acyl carrier protein, mitochondrial	NDUFAB1	1.67807e+06
Myoferlin	MYOF	1.13354e+06			SH3 and PX domain-containing protein 2B	SH3PXD2B	1.67743e+06
Glycine cleavage system H protein, mitochondrial	GCSH	1.12804e+06			NudC domain-containing protein 2	NUDCD2	1675100
DCN1-like protein 1	DCUN1D1	1.1271e+06			Thimet oligopeptidase	THOP1	1674540
Fatty aldehyde dehydrogenase	ALDH3A2	1.12624e+06			Acetoacetyl-CoA synthetase	AACS	1672420
Fibronectin type III domain-containing protein 1	FNDC1	1.11991e+06			Aspartyl/asparaginyl beta-hydroxylase	ASPH	1.66323e+06
Palladin	PALLD	1.11984e+06			NADH dehydrogenase [ubiquinone] 1 beta subcomplex subunit 11, mitochondrial	NDUFB11	1.66293e+06
Extracellular matrix protein 2	ECM2	1116630			Serine/threonine-protein phosphatase PP1-alpha catalytic subunit	PPP1CA	1.65922e+06
Transmembrane 9 superfamily member 4	TM9SF4	1.11539e+06			Choline transporter-like protein 1	SLC44A1	1.65027e+06
AH receptor-interacting protein	AIP	1112200			NADH dehydrogenase [ubiquinone] 1 alpha subcomplex assembly factor 3	NDUFAF3	1650200
Protein-glutamate O-methyltransferase	ARMT1	1.10977e+06			Dynamin-like 120 kDa protein, mitochondrial;Dynamin-like 120 kDa protein, form S1	OPA1	1.6435e+06
Transmembrane emp24 domain-containing protein 1	TMED1	1.10806e+06			V-type proton ATPase subunit S1	ATP6AP1	1.64333e+06
CTP synthase 1	CTPS1	1.10453e+06			Nucleoporin p54	NUP54	1.64182e+06
Cytochrome c oxidase copper chaperone	COX17	1.10421e+06			Transcription factor p65	RELA	1641700
Ectonucleotide pyrophosphatase/phosphodiesterase family member 2	ENPP2	1.10419e+06			Proline synthase co-transcribed bacterial homolog protein	PROSC	1640500
SPRY domain-containing protein 7	SPRYD7	1.10111e+06			Intraflagellar transport protein 27 homolog	IFT27	1.63989e+06
GDH/6PGL endoplasmic bifunctional protein;Glucose 1-dehydrogenase;6-phosphogluconolactonase	H6PD	1.10045e+06			N(G),N(G)-dimethylarginine dimethylaminohydrolase 2	DDAH2	1.63517e+06
Methyltransferase-like protein 7A	METTL7A	1.09973e+06			Translocation protein SEC63 homolog	SEC63	1.63422e+06
Creatine kinase U-type, mitochondrial;Creatine kinase S-type, mitochondrial	CKMT1A;CKMT2	1.09777e+06			Sequestosome-1	SQSTM1	1.6298e+06
V-type proton ATPase subunit S1	ATP6AP1	1.09641e+06			Vacuolar protein sorting-associated protein 37B	VPS37B	1617920
Peptidyl-prolyl cis-trans isomerase NIMA-interacting 1	PIN1	1095940			Peptidyl-prolyl cis-trans isomerase NIMA-interacting 1	PIN1	1616060
Twisted gastrulation protein homolog 1	TWSG1	1.09587e+06			Septin-8	SEPT8	1613510
Ubiquitin domain-containing protein 2	UBTD2	1092010			NADH dehydrogenase [ubiquinone] iron-sulfur protein 4, mitochondrial	NDUFS4	1.6118e+06
Protein phosphatase 1A;Protein phosphatase 1B	PPM1A;PPM1B	1.09196e+06			Abl interactor 1	ABI1	1.60711e+06
NADH dehydrogenase [ubiquinone] flavoprotein 1, mitochondrial	NDUFV1	1.09163e+06			Derlin-1	DERL1	1600630
EKC/KEOPS complex subunit TPRKB	TPRKB	1.09142e+06			Dynactin subunit 5	DCTN5	1.59886e+06
Uncharacterized protein C14orf142	C14orf142	1.0871e+06			Arf-GAP with coiled-coil, ANK repeat and PH domain-containing protein 2	ACAP2	1.59553e+06
Signal recognition particle 19 kDa protein	SRP19	1.08123e+06			Integrin alpha-V;Integrin alpha-V heavy chain;Integrin alpha-V light chain	ITGAV	1.58852e+06
Deoxyribonuclease-2-alpha	DNASE2	1079830			Actin-like protein 6A	ACTL6A	1587400
39S ribosomal protein L18, mitochondrial	MRPL18	1078500			Autophagy protein 5	ATG5	1578510
SEC14-like protein 2	SEC14L2	1.07757e+06			N(G),N(G)-dimethylarginine dimethylaminohydrolase 1	DDAH1	1578000
Exosome complex component RRP41	EXOSC4	1.07745e+06			C-1-tetrahydrofolate synthase, cytoplasmic;Methylenetetrahydrofolate dehydrogenase;Methenyltetrahydrofolate cyclohydrolase;Formyltetrahydrofolate synthetase;C-1-tetrahydrofolate synthase, cytoplasmic, N-terminally processed	MTHFD1	1.57623e+06
Fin bud initiation factor homolog	FIBIN	1.07674e+06			TLD domain-containing protein 1	TLDC1	1.57038e+06
PDZ and LIM domain protein 1	PDLIM1	1075750			3-hydroxyisobutyryl-CoA hydrolase, mitochondrial	HIBCH	1.56792e+06
Leucine-rich repeat flightless-interacting protein 2	LRRFIP2	1074330			Transcription factor Sp7	SP7	1.56731e+06
Epidermal growth factor receptor substrate 15-like 1	EPS15L1	1073100			Mitogen-activated protein kinase 14	MAPK14	1.56566e+06
Inositol polyphosphate 1-phosphatase	INPP1	1.07124e+06			Transformer-2 protein homolog alpha	TRA2A	1.56263e+06
Gamma-glutamylaminecyclotransferase	GGACT	1.06287e+06			Far upstream element-binding protein 3	FUBP3	1.56223e+06
Cystathionine gamma-lyase	CTH	1.06169e+06			GTP:AMP phosphotransferase AK3, mitochondrial	AK3	1.56058e+06
Laminin subunit alpha-4	LAMA4	1.06041e+06			Sorting nexin-2	SNX2	1557570
LYR motif-containing protein 5	LYRM5	1.05917e+06			DNA-directed RNA polymerase II subunit RPB3	POLR2C	1552430
Gremlin-1	GREM1	1058500			Histone-arginine methyltransferase CARM1	CARM1	1.55238e+06
Dihydrolipoyllysine-residue acetyltransferase component of pyruvate dehydrogenase complex, mitochondrial	DLAT	1052260			RNA-binding protein Raly	RALY	1.54928e+06
Dynactin subunit 5	DCTN5	1.05006e+06			Torsin-1A-interacting protein 2	TOR1AIP2	1.54847e+06
ER membrane protein complex subunit 4	EMC4	1048190			Importin-4	IPO4	1.54472e+06
Ovarian cancer-associated gene 2 protein	OVCA2	1045700			Hepatocyte growth factor-regulated tyrosine kinase substrate	HGS	1.54433e+06
Serrate RNA effector molecule homolog	SRRT	1044560			Zinc transporter 7	SLC30A7	1543480
Rab-like protein 3	RABL3	1.04447e+06			N-acetylgalactosamine-6-sulfatase	GALNS	1.53863e+06
Four and a half LIM domains protein 3	FHL3	1.04152e+06			LIM domain only protein 7	LMO7	1.53813e+06
Haloacid dehalogenase-like hydrolase domain-containing protein 2	HDHD2	1.04048e+06			Ribokinase	RBKS	1.53727e+06
Guanine nucleotide-binding protein-like 3	GNL3	1.04039e+06			Ras-related protein Rap-1b;Ras-related protein Rap-1b-like protein	RAP1B	1535190
Mitogen-activated protein kinase 14	MAPK14	1.03708e+06			GMP synthase [glutamine-hydrolyzing]	GMPS	1529810
PHD finger-like domain-containing protein 5A	PHF5A	1036950			Secretory carrier-associated membrane protein 1	SCAMP1	1528800
Transmembrane protein 214	TMEM214	1.03613e+06			GDP-fucose protein O-fucosyltransferase 1	POFUT1	1523080
THUMP domain-containing protein 1	THUMPD1	1034840			Zinc finger CCCH-type antiviral protein 1	ZC3HAV1	1.52067e+06
Dynactin subunit 4	DCTN4	1.03236e+06			Nucleoporin Nup43	NUP43	1516020
Septin-8	SEPT8	1028200			Protein NipSnap homolog 1	NIPSNAP1	1.51413e+06
Calcium-binding mitochondrial carrier protein Aralar2	SLC25A13	1.02701e+06			ER membrane protein complex subunit 1	EMC1	1.51194e+06
CAP-Gly domain-containing linker protein 1	CLIP1	1.02621e+06			Chromatin target of PRMT1 protein	CHTOP	1510920
Thimet oligopeptidase	THOP1	1.026e+06			Echinoderm microtubule-associated protein-like 2	EML2	1.50848e+06
Equilibrative nucleoside transporter 1	SLC29A1	1.02422e+06			Basic leucine zipper and W2 domain-containing protein 2	BZW2	1.50692e+06
Transformer-2 protein homolog alpha	TRA2A	1.02111e+06			Regulator of cell cycle RGCC	RGCC	1.5066e+06
Calcineurin B homologous protein 1	CHP1	1.01992e+06			E3 ubiquitin/ISG15 ligase TRIM25	TRIM25	1.50083e+06
Microtubule-associated protein RP/EB family member 2	MAPRE2	1019260			5-AMP-activated protein kinase subunit gamma-1	PRKAG1	1500400
Selenide, water dikinase 1	SEPHS1	1019250			39S ribosomal protein L50, mitochondrial	MRPL50	1.49291e+06
SRA stem-loop-interacting RNA-binding protein, mitochondrial	SLIRP	1.01409e+06			Coiled-coil domain-containing protein 90B, mitochondrial	CCDC90B	1488190
Nucleoporin p54	NUP54	1.01378e+06			RNA-binding protein 14	RBM14	1.48072e+06
Integrin alpha-11	ITGA11	1012110			Death-associated protein 1	DAP	1480570
Heme oxygenase 2	HMOX2	1.01011e+06			Pinin	PNN	1.47967e+06
Leucine-rich repeat-containing protein 1	LRRC1	1007040			Thymidine phosphorylase	TYMP	1.47881e+06
Mitochondrial import inner membrane translocase subunit TIM16	PAM16	1.0061e+06			NIF3-like protein 1	NIF3L1	1.45941e+06
Synembryn-A	RIC8A	1.00126e+06			Hsp70-binding protein 1	HSPBP1	1.45614e+06
Nucleoporin Nup43	NUP43	1.00005e+06			Ubiquitin-conjugating enzyme E2 G1;Ubiquitin-conjugating enzyme E2 G1, N-terminally processed	UBE2G1	1453220
RNA-binding protein 14	RBM14	998207			Fragile X mental retardation syndrome-related protein 2	FXR2	1.44967e+06
Sphingolipid delta(4)-desaturase DES1	DEGS1	996930			NFU1 iron-sulfur cluster scaffold homolog, mitochondrial	NFU1	1.44816e+06
LETM1 and EF-hand domain-containing protein 1, mitochondrial	LETM1	995280			Creatine kinase U-type, mitochondrial;Creatine kinase S-type, mitochondrial	CKMT1A;CKMT2	1446400
Nucleoprotein TPR	TPR	995060			Lysosomal alpha-mannosidase;Lysosomal alpha-mannosidase A peptide;Lysosomal alpha-mannosidase B peptide;Lysosomal alpha-mannosidase C peptide;Lysosomal alpha-mannosidase D peptide;Lysosomal alpha-mannosidase E peptide	MAN2B1	1443590
Utrophin	UTRN	987840			Utrophin	UTRN	1443310
Porphobilinogen deaminase	HMBS	987427			Twisted gastrulation protein homolog 1	TWSG1	1.44304e+06
Sepiapterin reductase	SPR	986430			Transforming growth factor beta-1;Latency-associated peptide	TGFB1	1438600
Switch-associated protein 70	SWAP70	985157			Cystathionine beta-synthase	CBS	1.43838e+06
Fragile X mental retardation syndrome-related protein 2	FXR2	983543			Nucleolar RNA helicase 2	DDX21	1435910
Nucleoplasmin-3	NPM3	983190			Unconventional myosin-Id	MYO1D	1.43329e+06
General transcription factor II-I	GTF2I	982797			BRISC complex subunit Abro1	FAM175B	1.42047e+06
Cytosolic Fe-S cluster assembly factor NUBP2	NUBP2	980923			U6 snRNA-associated Sm-like protein LSm6	LSM6	1418190
Tumor necrosis factor receptor type 1-associated DEATH domain protein	TRADD	980223			Optineurin	OPTN	1.41696e+06
E3 ubiquitin/ISG15 ligase TRIM25	TRIM25	977947			WD repeat domain phosphoinositide-interacting protein 1	WIPI1	1.41107e+06
Mannose-P-dolichol utilization defect 1 protein	MPDU1	976753			Lipase maturation factor 2	LMF2	1409860
Phosphatidylinositol 5-phosphate 4-kinase type-2 alpha	PIP4K2A	975637			E3 ubiquitin-protein ligase CHIP	STUB1	1408730
[truncated: 1,509 more rows]
